# Supplementary material for: Association between maternal infertility treatment and child neurodevelopment: findings from the Tohoku Medical Megabank Project Birth and Three-Generation Cohort Study in Miyagi and Iwate Prefectures, Japan
Source: PubMed Central journal article supplement — BMJ Open. 2022 Jun 7;12(6):e060944. doi: 10.1136/bmjopen-2022-060944 (PMC9174802; doi:10.1136/bmjopen-2022-060944), 2022-06-07
Supplement: bmjopen-2022-060944.draft_revisions.pdf [file bmjopen-2022-060944.draft_revisions.pdf]

# BMJ Open

BMJ Open is committed to open peer review. As part of this commitment we make the peer review history of every article we publish publicly available.

When an article is published we post the peer reviewers' comments and the authors' responses online. We also post the versions of the paper that were used during peer review. These are the versions that the peer review comments apply to.

The versions of the paper that follow are the versions that were submitted during the peer review process. They are not the versions of record or the final published versions. They should not be cited or distributed as the published version of this manuscript.

BMJ Open is an open access journal and the full, final, typeset and author-corrected version of record of the manuscript is available on our site with no access controls, subscription charges or pay-per-view fees (<http://bmjopen.bmj.com>).

If you have any questions on BMJ Open's open peer review process please email [info.bmjopen@bmj.com](mailto:info.bmjopen@bmj.com)

# BMJ Open

## Association between infertility treatment and children's neurodevelopment: the Tohoku Medical Megabank Project Birth and Three-Generation Cohort Study

|                               |                                                                                                                                                                                                                                                                                                                                                                                                                                                                                                                                                                                                                                                                                                                                                                                                                                                                                                                                                                                                                                                                                                                                                                                                                                                                                                                                                                                                                                                                                                                                                                                                                                                                                                                                                                                                                                                                                                                                                                                                                                                                                                                                                                                                                   |
|-------------------------------|-------------------------------------------------------------------------------------------------------------------------------------------------------------------------------------------------------------------------------------------------------------------------------------------------------------------------------------------------------------------------------------------------------------------------------------------------------------------------------------------------------------------------------------------------------------------------------------------------------------------------------------------------------------------------------------------------------------------------------------------------------------------------------------------------------------------------------------------------------------------------------------------------------------------------------------------------------------------------------------------------------------------------------------------------------------------------------------------------------------------------------------------------------------------------------------------------------------------------------------------------------------------------------------------------------------------------------------------------------------------------------------------------------------------------------------------------------------------------------------------------------------------------------------------------------------------------------------------------------------------------------------------------------------------------------------------------------------------------------------------------------------------------------------------------------------------------------------------------------------------------------------------------------------------------------------------------------------------------------------------------------------------------------------------------------------------------------------------------------------------------------------------------------------------------------------------------------------------|
| Journal:                      | <i>BMJ Open</i>                                                                                                                                                                                                                                                                                                                                                                                                                                                                                                                                                                                                                                                                                                                                                                                                                                                                                                                                                                                                                                                                                                                                                                                                                                                                                                                                                                                                                                                                                                                                                                                                                                                                                                                                                                                                                                                                                                                                                                                                                                                                                                                                                                                                   |
| Manuscript ID                 | bmjopen-2022-060944                                                                                                                                                                                                                                                                                                                                                                                                                                                                                                                                                                                                                                                                                                                                                                                                                                                                                                                                                                                                                                                                                                                                                                                                                                                                                                                                                                                                                                                                                                                                                                                                                                                                                                                                                                                                                                                                                                                                                                                                                                                                                                                                                                                               |
| Article Type:                 | Original research                                                                                                                                                                                                                                                                                                                                                                                                                                                                                                                                                                                                                                                                                                                                                                                                                                                                                                                                                                                                                                                                                                                                                                                                                                                                                                                                                                                                                                                                                                                                                                                                                                                                                                                                                                                                                                                                                                                                                                                                                                                                                                                                                                                                 |
| Date Submitted by the Author: | 10-Jan-2022                                                                                                                                                                                                                                                                                                                                                                                                                                                                                                                                                                                                                                                                                                                                                                                                                                                                                                                                                                                                                                                                                                                                                                                                                                                                                                                                                                                                                                                                                                                                                                                                                                                                                                                                                                                                                                                                                                                                                                                                                                                                                                                                                                                                       |
| Complete List of Authors:     | <p>Noda, Aoi; Tohoku University, Tohoku Medical Megabank Organization; Tohoku University Graduate School of Medicine</p> <p>Ishikuro, Mami; Tohoku Medical Megabank Organization, Department of Preventive Medicine and Epidemiology; Tohoku University Graduate School of Medicine</p> <p>Obara, Taku; Tohoku University, Tohoku Medical Megabank Organization; Tohoku University Graduate School of Medicine</p> <p>Murakami, Keiko; Tohoku University, Tohoku Medical Megabank Organization; Tohoku University Graduate School of Medicine</p> <p>Ueno, Fumihiko; Tohoku University, Tohoku Medical Megabank Organization; Tohoku University Graduate School of Medicine</p> <p>Matsuzaki, Fumiko; Tohoku University, Tohoku Medical Megabank Organization; Tohoku University Graduate School of Medicine</p> <p>Onuma, Tomomi; Tohoku University, Tohoku Medical Megabank Organization</p> <p>Watanabe, Zen; Tohoku University Graduate School of Medicine; Tohoku University Hospital</p> <p>Shiga, Naomi; Tohoku University Graduate School of Medicine; Tohoku University Hospital</p> <p>Iwama, Noriyuki; Tohoku University Graduate School of Medicine; Tohoku University Hospital</p> <p>Hirota, Hamada; Tohoku University Graduate School of Medicine; Tohoku University Hospital</p> <p>Otsuka, Tatsui; Tohoku University Graduate School of Medicine; Tohoku University Hospital</p> <p>Tachibana, Masahito; Tohoku University Graduate School of Medicine; Tohoku University Hospital</p> <p>Tomita, Hiroaki; Tohoku University Graduate School of Medicine; Tohoku University Hospital</p> <p>Saito, Masatoshi; Tohoku University Graduate School of Medicine; Tohoku University Hospital</p> <p>Sugawara, Junichi; Tohoku Medical Megabank Organization, Tohoku University, Feto-Maternal Medical Science; Tohoku University Graduate School of Medicine, Obstetrics and Gynecology</p> <p>Kure, Shigeo; Tohoku University, Department of Pediatrics</p> <p>Yaegashi, Nobuo; Tohoku University Graduate School of Medicine; Tohoku University Hospital</p> <p>Kuriyama, Shinichi; Tohoku University Graduate School of Medicine, Department of Molecular Epidemiology, Environment and Genome</p> |

1  
2  
3  
4  
5  
6  
7  
8  
9  
10  
11  
12  
13  
14  
15  
16  
17  
18  
19  
20  
21  
22  
23  
24  
25  
26  
27  
28  
29  
30  
31  
32  
33  
34  
35  
36  
37  
38  
39  
40  
41  
42  
43  
44  
45  
46  
47  
48  
49  
50  
51  
52  
53  
54  
55  
56  
57  
58  
59  
60

|           |                                                                                                       |
|-----------|-------------------------------------------------------------------------------------------------------|
|           | Research Center; Tohoku University, Tohoku Medical Megabank Organization                              |
| Keywords: | EPIDEMIOLOGY, Maternal medicine < OBSTETRICS, Developmental neurology & neurodisability < PAEDIATRICS |
|           |                                                                                                       |

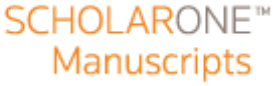

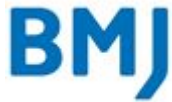

I, the Submitting Author has the right to grant and does grant on behalf of all authors of the Work (as defined in the below author licence), an exclusive licence and/or a non-exclusive licence for contributions from authors who are: i) UK Crown employees; ii) where BMJ has agreed a CC-BY licence shall apply, and/or iii) in accordance with the terms applicable for US Federal Government officers or employees acting as part of their official duties; on a worldwide, perpetual, irrevocable, royalty-free basis to BMJ Publishing Group Ltd ("BMJ") its licensees and where the relevant Journal is co-owned by BMJ to the co-owners of the Journal, to publish the Work in this journal and any other BMJ products and to exploit all rights, as set out in our [licence](#).

The Submitting Author accepts and understands that any supply made under these terms is made by BMJ to the Submitting Author unless you are acting as an employee on behalf of your employer or a postgraduate student of an affiliated institution which is paying any applicable article publishing charge ("APC") for Open Access articles. Where the Submitting Author wishes to make the Work available on an Open Access basis (and intends to pay the relevant APC), the terms of reuse of such Open Access shall be governed by a Creative Commons licence – details of these licences and which [Creative Commons](#) licence will apply to this Work are set out in our licence referred to above.

Other than as permitted in any relevant BMJ Author's Self Archiving Policies, I confirm this Work has not been accepted for publication elsewhere, is not being considered for publication elsewhere and does not duplicate material already published. I confirm all authors consent to publication of this Work and authorise the granting of this licence.

1  
2  
3  
4  
5  
6  
7  
8  
9  
10  
11  
12  
13  
14  
15  
16  
17  
18  
19  
20  
21  
22  
23  
24  
25  
26  
27  
28  
29  
30  
31  
32  
33  
34  
35  
36  
37  
38  
39  
40  
41  
42  
43  
44  
45  
46  
47  
48  
49  
50  
51  
52  
53  
54  
55  
56  
57  
58  
59  
60

# Association between infertility treatment and children's neurodevelopment: the Tohoku Medical Megabank Project Birth and Three-Generation Cohort Study

Aoi Noda<sup>1,2,3</sup>, Mami Ishikuro<sup>1,2</sup>, Taku Obara<sup>1,2,3</sup>, Keiko Murakami<sup>1,2</sup>, Fumihiko Ueno<sup>1,2</sup>, Fumiko Matsuzaki<sup>1,2</sup>, Tomomi Onuma<sup>1</sup>, Zen Watanabe<sup>2,3</sup>, Naomi Shiga<sup>2,3</sup>, Noriyuki Iwama<sup>1,2,3</sup>, Hamada Hirotaka<sup>2,3</sup>, Tatsui Otsuka<sup>2,3</sup>, Masahito Tachibana<sup>2,3</sup>, Hiroaki Tomita<sup>1,2,3,4</sup>, Masatoshi Saito<sup>2,3</sup>, Junichi Sugawara<sup>1,2,3</sup>, Shigeo Kure<sup>1,2,3</sup>, Nobuo Yaegashi<sup>1,2,3</sup>, Shinichi Kuriyama<sup>1,2,4</sup>

<sup>1</sup> Tohoku Medical Megabank Organization, Tohoku University, Sendai, Miyagi, Japan.

<sup>2</sup> Tohoku University Graduate School of Medicine, Sendai, Miyagi, Japan.

<sup>3</sup> Tohoku University Hospital, Sendai, Miyagi, Japan.

<sup>4</sup> International Research Institute of Disaster Science, Tohoku University, Sendai, Miyagi, Japan.

**Correspondence:** Taku Obara

Division of Preventive Medicine and Epidemiology, Tohoku Medical Megabank Organization,

Tohoku University, 2-1 Seiryō-cho, Aoba-ku, Sendai 980-8573, Japan

Tel.: +81 22 717 8104, Fax: +81 22 717 8106, Email: [obara-t@hosp.tohoku.ac.jp](mailto:obara-t@hosp.tohoku.ac.jp)

## Abstract

**Objectives:** This study aims to examine the association between infertility treatment and neurodevelopment in children at 2 and 3.5 years of age.

**Design:** Prospective cohort study

**Setting:** Pregnant women were recruited in obstetric clinics or hospitals and their children were followed up by the questionnaire.

**Participants:** The study population consisted of mother-child pairs who participated in the Tohoku Medical Megabank Project Birth and Three-Generation Cohort Study.

**Primary and secondary outcome measures:** The children's neurodevelopmental outcomes were assessed at 2 and 3.5 years of age using the Ages and Stages Questionnaire, third edition (ASQ-3), which consists of questions on five developmental domains. We performed a multivariate logistic regression analysis of the association between infertility treatment (including ovulation induction [OI], artificial insemination with husband's sperm [AIH], and assisted reproductive technology [ART]) and the clinical range of ASQ-3.

**Results:** Of 9,655 mother-child pairs, 273 (2.8%) and 487 (5.0%) were conceived through OI/AIH and ART, respectively. The odds of having developmental delays at 2 years of age were higher in children conceived through OI/AIH [odds ratio (OR), 1.36; 95% confidence interval

1  
2  
3  
4  
5  
6 (95% confidence interval [CI]), 1.00-1.85] and ART (OR, 1.36; 95% CI, 1.07-1.72) than in those  
7  
8  
9 conceived naturally. Additionally, OI/AIH and ART were significantly associated with  
10  
11  
12 communication (OR, 1.93; 95% CI, 1.25-2.98) and gross motor (OR, 1.50; 95% CI, 1.08-2.09)  
13  
14  
15 delays, respectively. In contrast, infertility treatments were not associated with any domains of  
16  
17  
18 the ASQ-3 in children aged 3.5 years.

19  
20  
21 **Conclusion:** In this study, we found a significant association between infertility treatment and  
22  
23  
24 children's neurodevelopment at 2 years of age, whereas no statistically significant differences  
25  
26  
27 were found at 3.5 years of age.

28  
29  
30  
31  
32  
33 **Keywords:** Ages and Stages Questionnaire, Cohort study, Infertility treatment,  
34  
35  
36 Neurodevelopment, Assisted reproductive technology.

37  
38  
39  
40  
41  
42 **Word count:** 2399

### 43 44 45 46 47 48 **Strengths and limitations of this study**

- 49  
50  
51 ● The large sample size in this study allowed us to investigate the association between each  
52  
53  
54 type of infertility treatment and neurodevelopmental outcomes.
- 55  
56  
57 ● We evaluated children's neurodevelopment at two points—2 and 3.5 years of age.

- ASQ-3 is a screening tool (not a diagnostic tool) for developmental delays.
- The number of children born through specific forms of infertility treatment, such as fresh embryo transfer, was insufficient to allow sub-analysis of fresh or frozen embryo transfer.

## Introduction

With the rapid progress in infertility treatment, the number of women who use infertility treatment is increasing, and more than 10% of the childbearing population has resorted to assisted reproductive technology (ART) for conception.[1] In recent years, the number of fertility treatments in Japan has also been on the increase. In 2018, 56,000 new-borns were conceived through ART, including in vitro fertilisation (IVF) and intracytoplasmic sperm injection (ICSI). This accounts for approximately 6% of all live births in the same year.[2] Because conception using ART involves several processes (such as physical manipulation of gametes and exposure of embryos to hormones and culture media) that differ greatly from those in a natural conception, there is potential for disturbance of normal early developmental processes.[3, 4] Therefore, many studies have investigated the association between ART and neurodevelopmental outcomes. A systematic review of neurodevelopmental disorders,[5] neuromotor, cognitive, language, and behavioural outcomes of children born after ART showed that ART had no significant effect on children's neuromotor and cognitive development.[6] A



1  
2  
3  
4  
5  
6 previous hospital-based cohort study in Japan found that at 2 years of age, no significant  
7  
8  
9 difference in neurodevelopment existed between children conceived through ART and those  
10  
11  
12 conceived naturally.[7] In contrast, the Danish National Birth Cohort study showed that children  
13  
14  
15 conceived through ART had a slight delay in motor and cognitive development at 1.5 years of  
16  
17  
18 age compared to children conceived naturally.[8]  
19

20  
21 The findings have been almost entirely consistent in showing that singleton children  
22  
23  
24 conceived through ART and born at term are no different neurodevelopmentally from those born  
25  
26  
27 following natural conception. However, the evidence remains equivocal,[8–11] and another  
28  
29  
30 review stated that possible associations between infertility treatment and developmental delay  
31  
32  
33 require further assessment in larger studies.[12] The inconsistent results in the previous studies  
34  
35  
36 may have been due to the small sample size (fewer than 1000 children),[3] and a longitudinal  
37  
38  
39 study with a larger sample size is needed.  
40

41  
42 This study aims to investigate the association between infertility treatment and  
43  
44  
45 children's neurodevelopment at 2 and 3.5 years of age in a Japanese birth cohort.  
46  
47  
48  
49  
50

## 51 **Methods**

### 52 ***Study setting and participants***

53  
54  
55  
56  
57  
58  
59  
60

1  
2  
3  
4  
5  
6 This study was based on data obtained by the Tohoku Medical Megabank Project Birth and  
7  
8  
9 Three-Generation Cohort Study (TMM BirThree Cohort Study). The TMM BirThree Cohort Study  
10  
11  
12 is a prospective cohort study based in Miyagi Prefecture, Japan, and has been published  
13  
14  
15 elsewhere.[13, 14] Pregnant women and their family members were contacted in obstetric  
16  
17  
18 clinics or hospitals from 2013 to 2017, and 23,406 pregnant women participated in the study.  
19  
20  
21 Written informed consent was obtained from all participants. All participants were free to decline  
22  
23  
24 consent to participate in the research and were told that there was no disadvantage or risk  
25  
26  
27 involved with their refusal to participate. The TMM BirThree Cohort Study protocol was  
28  
29  
30 approved by the Tohoku University Tohoku Medical Megabank Organization's internal review  
31  
32  
33 board (2013-1-103-1).  
34  
35  
36  
37  
38

### 39 ***Infertility treatments***

40  
41  
42 We extracted infertility treatment types from maternal medical records, and they included  
43  
44  
45 ovulation induction (OI), artificial insemination (AIH), IVF, and ICSI; we refer to IVF and ICSI as  
46  
47  
48 ART in this study.  
49  
50  
51  
52  
53

### 54 ***Neurodevelopmental assessments***

1  
2  
3  
4  
5  
6 The third edition of the Ages and Stages Questionnaire (ASQ-3) was used to evaluate child  
7  
8  
9 neurodevelopment.[15, 16] ASQ-3 is a comprehensive, reliable screening questionnaire that  
10  
11  
12 can be used for children aged 1 and 66 months. The guardians of children aged 2 and 3.5 years  
13  
14  
15 filled in the questionnaire. Each questionnaire contains 30 questions divided into five  
16  
17  
18 developmental domains: “communication”, “fine motor”, “gross motor”, “problem solving”, and  
19  
20  
21 “personal-social”. Each domain has a set of six items, and each item is given a score of 10, 5,  
22  
23  
24 and 0 corresponding to “yes”, “sometimes”, and “not yet”, respectively. The total score ranges  
25  
26  
27 from 0 to 60 for each domain. We defined “developmental delay” in a domain as when the score  
28  
29  
30 was greater than two standard deviations (SD) below the mean in that domain.[17] In this study,  
31  
32  
33 we used the validated Japanese translation of ASQ-3.[16]  
34  
35  
36  
37  
38  
39  
40  
41  
42  
43  
44  
45  
46  
47  
48  
49  
50  
51  
52  
53  
54  
55  
56  
57  
58  
59  
60

## **Covariates**

42 Considering previous studies and the characteristics of the population in this study, we included  
43  
44  
45 maternal age at delivery, parity, preterm birth (PTB), child sex, birth defects, multiple births,  
46  
47  
48 maternal education, and household income as covariates of developmental outcomes.[7, 18]  
49  
50  
51 Maternal age, gestational weeks, parity, child sex, birth defect, and multiple birth were obtained  
52  
53  
54 from medical records. Data on maternal level of education and household income were  
55  
56  
57 obtained using a self-report questionnaire.  
58  
59  
60

## ***Statistical analysis***

Characteristics of mothers and children were compared in three groups: natural conception, OI/AIH, and ART. Continuous and categorical variables were described as mean (SD) and frequency or proportion, respectively. Differences in prevalence were analysed using the chi-square test. Logistic regression analyses were performed to determine the associations between infertility treatment and each of the five domains of ASQ-3 at 2 and 3.5 years of age after adjusting for possible confounding factors. Odds ratios (ORs) and confidence intervals (CIs) were calculated. Children who were conceived naturally were used as the reference group in all analyses. For subgroup analyses, participants were classified into five groups as follows: natural conception, OI, AIH, IVF, and ICSI. Furthermore, we compared developmental outcomes among children born following natural conception, fresh embryo transfer (ET), and frozen-thawed ET. Statistical significance was set at  $p < 0.05$ . All statistical analyses were performed using SAS version 9.4 (SAS Institute, Inc., Cary, NC, USA).

## ***Patient and public involvement***

No participants were involved in this study because we used existing dataset for the analysis.

## Results

### *Characteristics of the participants*

We analysed data from 9,655 eligible mother-child pairs who filled in ASQ-3 questionnaires (Figure 1). Of the 9,655 mother-child pairs, 273 (2.8%) were conceived through OI/AIH and 487 (5.0%) through ART. Maternal and child characteristics are shown in Table 1. Mothers who were exposed to infertility treatment were older and had higher levels of educational and household income. Children who were conceived following infertility treatment were likely to have a lower birth weight (LBW) and gestational age.

### *Infertility treatment and children's neurodevelopment at 2 years of age*

In total, 1,437 children (14.9%) had developmental delay at 2 years of age when screened using the ASQ-3. The proportion of children with developmental delays at 2 years of age was 14.3%, 21.3%, and 22.5% for natural conception, OI/AIH, and ART, respectively. In the multivariable models, the odds of having developmental delays at 2 years of age were higher in children conceived through OI/AIH (OR, 1.36; 95% CI, 1.00-1.85) and ART (OR, 1.36; 95% CI, 1.07-1.72) than in those conceived naturally. OI/AIH and ART were significantly associated with communication (OR, 1.93; 95% CI, 1.25-2.98), and gross motor (OR, 1.50; 95% CI, 1.08-2.09)

1  
2  
3  
4  
5  
6 delays, respectively (Table 2).  
7  
8  
9  
10

### 11 ***Infertility treatment and children's neurodevelopment at 3.5 years of age***

12  
13  
14  
15 In total, 1,257 children (13.0%) had developmental delay at 3.5 years of age when screened  
16  
17  
18 using the ASQ-3. The proportion of children with developmental delay at 3.5 years of age was  
19  
20  
21 12.9%, 14.7%, and 13.8% for natural conception, OI/AIH, and ART, respectively. In the  
22  
23  
24 multivariable models, the odds of having developmental delays at 3.5 years of age were higher  
25  
26  
27 in children conceived through OI/AIH (OR, 1.13; 95% CI, 0.79-1.61) and ART (OR, 1.03; 95%  
28  
29  
30 CI, 0.78-1.37) than in those conceived naturally. Moreover, children conceived through infertility  
31  
32  
33 treatment had no statistically significant differences in any domains at 3.5 years of age (Table  
34  
35  
36 2).  
37  
38

39 Subgroups based on the 5 domains and embryo types were analysed and the results  
40  
41  
42 are shown in supplementary tables S1 to S4. Although the number of children conceived  
43  
44  
45 through each infertility treatment was less, the results, when compared within the five groups or  
46  
47  
48 types of ET, were similar to those within the three groups.  
49  
50  
51  
52  
53

## 54 **Discussion**

55  
56  
57 We investigated the association between infertility treatment and children's neurodevelopment,  
58  
59  
60

1  
2  
3  
4  
5  
6 among 9,655 mother-child pairs. In multivariable models, a significant association between  
7  
8  
9 infertility treatment and neurodevelopment was observed among the children conceived through  
10  
11  
12 infertility treatment, at 2 years of age; no statistically significant differences were found in them  
13  
14  
15 at 3.5 years of age.

16  
17  
18 Children conceived through ART are known to be at risk of LBW, PTB, and birth  
19  
20  
21 defects,[19] which are risk factors for neurodevelopmental disorders.[20, 21] However, the data  
22  
23  
24 from previous studies among children aged 1–5 years suggest that there are no developmental  
25  
26  
27 differences between children conceived through ART and those conceived naturally, after  
28  
29  
30 adjusting for confounding variables.[3, 19, 22] Even when children with congenital anomalies or  
31  
32  
33 genetic syndromes and multiple births (which are known to affect development) were excluded  
34  
35  
36 from the study (n = 9,271), a significant association between infertility treatment and children's  
37  
38  
39 neurodevelopment was seen at 2 years of age, while no statistically significant differences were  
40  
41  
42 found at 3.5 years of age (Table S5). A previous study showed no significant difference in the  
43  
44  
45 neurodevelopmental scores between children conceived through ART and those conceived  
46  
47  
48 naturally; however, it showed a decrease in the score units of each scale among children  
49  
50  
51 conceived through ART.[23] The reason for the discrepancy in results at 2 years of age  
52  
53  
54 between our study and the previous study might be the proportion of children conceived through  
55  
56  
57 infertility treatment. Because infertility treatment has become widespread owing to technological  
58  
59  
60

1  
2  
3  
4  
5  
6 advancement, the proportion of children conceived through infertility treatment was higher in our  
7  
8  
9 study than in previous studies.[24–26] Therefore, statistical differences might be detectable in  
10  
11  
12 our study. In addition, frozen-thawed embryos have been used for most ARTs in Japan.[27]  
13  
14  
15 Frozen-thawed ET is associated with a significantly lower incidence of PTB and LBW, which are  
16  
17  
18 risk factors for neurodevelopmental disorders.[28] Among children with developmental delay at  
19  
20  
21 2 years of age, the proportion with developmental delay at 3.5 years of age was 47.3%,46.6%,  
22  
23  
24 and 38.5% for natural conception, OI/AIH, and ART, respectively. The proportion of children  
25  
26  
27 with developmental delay at 3.5 years of age was low, especially in those conceived through  
28  
29  
30 ART. Our longitudinal study demonstrated that at 2 and 3.5 years of age, the  
31  
32  
33 neurodevelopmental status of children conceived through infertility treatment, especially ART,  
34  
35  
36 might eventually catch up with that of those conceived naturally. In Japan, the health check-up  
37  
38  
39 for children is done at 1.5 years of age, so the counsel provided by doctors and public health  
40  
41  
42 nurses, which is tailored towards individual development, might also help promote the children's  
43  
44  
45 development. A previous study in Japan stated that the developmental state of a child needs to  
46  
47  
48 be understood not only based on the characteristics of the child at one point but also on the  
49  
50  
51 progress of the child's development from the results of the health check-up at 1.5 years of age.  
52  
53  
54 In fact, it has been suggested that it is important to conduct a follow-up health check-up at 3  
55  
56  
57 years of age in relation to the development at the previous age.[29]  
58  
59  
60



1  
2  
3  
4  
5  
6  
7                   Developmental delay in the communication domain was seen at age 2 years in  
8  
9  
10 children conceived through OI/AIH but not in those conceived through ART. A previous study  
11  
12 showed that compared with children conceived naturally, those conceived through OI had lower  
13  
14 verbal ability at 3 years of age, while those conceived through ART had higher verbal ability;  
15  
16 children conceived through infertility treatment had higher verbal ability at 5 years of age than  
17  
18 those conceived naturally.[30] Another study in Japan showed that children conceived through  
19  
20 ART had significantly better language development than those conceived naturally.[7] Although  
21  
22 direct comparisons with other studies assessing neurodevelopment in children conceived  
23  
24 through infertility treatment are difficult because each researcher uses various assessment tools  
25  
26 and control groups, the children conceived through ART might have higher verbal ability or  
27  
28 better language development than those conceived through OI/AIH or naturally. Children  
29  
30 conceived through infertility treatments generally enjoy advantageous socioeconomic benefits. It  
31  
32 is possible that parents who utilise ART to conceive may invest more into rearing the children,  
33  
34 which might have the greatest impact on language skills.[7, 30, 31]  
35  
36  
37  
38  
39  
40  
41  
42  
43  
44  
45  
46  
47

48                   Furthermore, ART was associated with developmental delays in the gross motor  
49  
50 domain at 2 years of age. This association was not seen at 3.5 years of age. A hospital-based  
51  
52 cohort study in Japan reported no significant difference in gross motor function (evaluated using  
53  
54 the Ability for Basic Movement Scale for Children) at 12 months of age between the ART and  
55  
56  
57  
58  
59  
60

1  
2  
3  
4  
5  
6 control groups.[32] In contrast, one study showed that infertility treatment, especially ICSI, may  
7  
8  
9 be associated with a slight delay in gross motor development at 1.5 years of age.[8] However,  
10  
11  
12 another study suggested no differences in motor development at 5 years of age among children  
13  
14  
15 conceived through ICSI, IVF, and natural conception.[33] These findings suggest that infertility  
16  
17  
18 treatment might be associated with children's development in the early stage, but the  
19  
20  
21 neurodevelopment of children conceived through infertility treatment might catch up with that of  
22  
23  
24 those conceived naturally.  
25

26  
27 This study had some limitations. The ASQ-3 is a screening tool (not a diagnostic tool)  
28  
29  
30 for developmental delays; however, it is considered to be highly reliable because it has been  
31  
32  
33 validated in many countries worldwide and has been used in a variety of studies.[18, 34, 35]  
34  
35  
36 Since we focused on children who filled in both questionnaires (at 2 and 3.5 years of age), there  
37  
38  
39 was the concern of bias due to the reduced number of participants and the deterioration of  
40  
41  
42 statistical power in the analysis. However, among the children who did not fill in the  
43  
44  
45 questionnaire at 3.5 years of age, the percentage of those who had neurodevelopmental delay  
46  
47  
48 at 2 years of age was 14.5%, 10.8%, and 15.0% for natural conception, OI/AIH, and ART,  
49  
50  
51 respectively. Therefore, there was no bias such as more children with neurodevelopmental  
52  
53  
54 delay at 2 years of age among children who did not answer the questionnaire at 3.5 years old  
55  
56  
57 and the potential applicability of our results to national populations can be discussed. In the  
58  
59  
60

1  
2  
3  
4  
5  
6 subgroup analysis with detailed classification, the number of children conceived through specific  
7  
8  
9 forms of infertility treatment, such as fresh ET, was insufficient to compare the ET types.

10  
11  
12 Research in this field is complex because of the need to collect various data to determine the  
13  
14  
15 effects of infertility treatment on offspring outcomes. As this was an observational study,  
16  
17  
18 residual confounding might have occurred. However, this study was a large longitudinal birth  
19  
20  
21 cohort with detailed information from the participants, and although continued follow-up of  
22  
23  
24 children born after infertility treatment is needed, this study helps to increase the understanding  
25  
26  
27 of the association between infertility treatment and neurodevelopmental outcomes in Japanese  
28  
29  
30 children.  
31  
32  
33  
34  
35

## 36 **Conclusion**

37  
38  
39 In this study, we found a significant association between infertility treatment and  
40  
41  
42 neurodevelopment among children who were conceived through infertility treatments and those  
43  
44  
45 conceived naturally, at 2 years of age; however, no statistically significant differences were  
46  
47  
48 found at 3.5 years of age.  
49  
50  
51  
52  
53

## 54 **Acknowledgments**

55  
56  
57 We are sincerely grateful to all participants of the TMM BirThree Cohort Study and the staff  
58  
59  
60

1  
2  
3  
4  
5  
6 members of the Tohoku Medical Megabank Organization, Tohoku University. A full list of  
7  
8  
9 members is available at <https://www.megabank.tohoku.ac.jp/english/a210901/>.

10  
11  
12  
13  
14  
15 **Author contributions:** All authors met the criteria of authorship as outlined in the ICMJE and  
16  
17  
18 approved this manuscript for submission. Specific contributions were as follows: data collection:  
19  
20  
21 all authors; conception or design of the work: AN, MI and TO; data analysis and interpretation:  
22  
23  
24 AN, MI and TO; critical revision of the article or drafting of the article: all authors.  
25  
26  
27  
28  
29

30  
31 **Funding:** The TMM BirThree Cohort Study was supported by the Japan Agency for Medical  
32  
33  
34 Research and Development (AMED), Japan (JP21km0105001). Funding sources had no role in  
35  
36  
37 the study design, collection, analysis, or interpretation of the data, writing of the manuscript, or  
38  
39  
40 decision to submit the paper for publication.  
41  
42  
43  
44

45 **Competing interests:** None declared.  
46  
47  
48  
49  
50

51 **Provenance and peer review:** Not commissioned; externally peer reviewed.  
52  
53  
54  
55  
56

57 **Data availability statement:** We share some of the identified data from the BirThree Cohort  
58  
59  
60

Study in the Tohoku Medical Megabank Organization.

## References

- 1 Frederiksen Y, Farver-Vestergaard I, Skovgård NG, et al. Efficacy of psychosocial interventions for psychological and pregnancy outcomes in infertile women and men: a systematic review and meta-analysis. *BMJ Open* 2015;5:e006592.
- 2 Japan society of obstetrics and gynecology (in Japanese). [https://plaza.umin.ac.jp/~jsog-art/2018data\\_20201001.pdf](https://plaza.umin.ac.jp/~jsog-art/2018data_20201001.pdf) (Accessed 31 Dec 2021).
- 3 Wilson CL, Fisher JR, Hammarberg K, et al. Looking downstream: a review of the literature on physical and psychosocial health outcomes in adolescents and young adults who were conceived by ART. *Hum Reprod* 2011;26:1209–19.
- 4 Sullivan-Pyke CS, Senapati S, Mainigi MA, et al. In vitro fertilization and adverse obstetric and perinatal outcomes. *Semin Perinatol* 2017;41:345–53.
- 5 Djuwantono T, Aviani JK, Permadi W, et al. Risk of neurodevelopmental disorders in children born from different ART treatments: a systematic review and meta-analysis. *J Neurodev Disord* 2020;12:33.
- 6 Middelburg KJ, Heineman MJ, Bos AF, et al. Neuromotor, cognitive, language and behavioural outcome in children born following IVF or ICSI-a systematic review. *Hum*

1  
2  
3  
4  
5  
6  
7  
8  
9  
10  
11  
12  
13  
14  
15  
16  
17  
18  
19  
20  
21  
22  
23  
24  
25  
26  
27  
28  
29  
30  
31  
32  
33  
34  
35  
36  
37  
38  
39  
40  
41  
42  
43  
44  
45  
46  
47  
48  
49  
50  
51  
52  
53  
54  
55  
56  
57  
58  
59  
60

*Reprod Update* 2008;14:219–31.

- 7 Aoki S, Hashimoto K, Ogawa K, et al. Developmental outcomes of Japanese children born through assisted reproductive technology (ART) in toddlerhood. *J Obstet Gynaecol Res* 2018;44:929–35.
- 8 Zhu JL, Basso O, Obel C, et al. Infertility, infertility treatment and psychomotor development: the Danish National Birth Cohort. *Paediatr Perinat Epidemiol* 2009;23:98–106.
- 9 Catford SR, McLachlan RI, O'Bryan MK, et al. Long-term follow-up of intra-cytoplasmic sperm injection-conceived offspring compared with in vitro fertilization-conceived offspring: a systematic review of health outcomes beyond the neonatal period. *Andrology* 2017;5:610–21.
- 10 Punamäki RL, Tiitinen A, Lindblom J, et al. Mental health and developmental outcomes for children born after ART: a comparative prospective study on child gender and treatment type. *Hum Reprod* 2016;31:100–7.
- 11 Sutcliffe AG, Ludwig M. Outcome of assisted reproduction. *Lancet* 2007;370:351–9.
- 12 Hvidtjørn D, Schieve L, Schendel D, et al. Cerebral palsy, autism spectrum disorders, and developmental delay in children born after assisted conception: a systematic review and meta-analysis. *Arch Pediatr Adolesc Med* 2009;163:72–83.

- 1  
2  
3  
4  
5  
6  
7 13 Kuriyama S, Metoki H, Kikuya M, et al. Cohort profile: Tohoku Medical Megabank Project  
8  
9 Birth and three-Generation Cohort Study (TMM BirThree Cohort Study): rationale, progress  
10  
11 and perspective. *Int J Epidemiol* 2020;49:18–19.  
12  
13  
14  
15 14 Ishikuro M, Obara T, Osanai T, et al. Strategic methods for recruiting grandparents: the  
16  
17 Tohoku medical Megabank birth and three-generation cohort study. *Tohoku J Exp Med*  
18  
19 2018;246:97–105.  
20  
21  
22  
23  
24 15 Singh A, Yeh CJ, Blanchard SB. Ages and Stages Questionnaire: a global screening scale.  
25  
26  
27 *Bol Med Hosp Infant Mex* 2017;74:5–12.  
28  
29  
30 16 Mezawa H, Aoki S, Nakayama SF, et al. Psychometric profile of the Ages and Stages  
31  
32 Questionnaires, Japanese translation. *Pediatr Int* 2019;61:1086–95.  
33  
34  
35  
36 17 Squires J, Twombly E, Bricker D, et al. B. As Q®-3 User's Guide. 3rd ed. Baltimore, MD:  
37  
38 Brookes 2009.  
39  
40  
41  
42 18 Yeung EH, Sundaram R, Bell EM, et al. Examining infertility treatment and early childhood  
43  
44 development in the upstate KIDS study. *JAMA Pediatr* 2016;170:251–8.  
45  
46  
47  
48 19 Vuong LN, Ly TT, Nguyen NA, et al. Development of children born from freeze-only versus  
49  
50 fresh embryo transfer: follow-up of a randomized controlled trial. *Fertil Steril* 2020;114:558–  
51  
52 66.  
53  
54  
55  
56 20 Helmerhorst FM, Perquin DA, Donker D, et al. Perinatal outcome of singletons and twins  
57  
58  
59  
60

- 1  
2  
3  
4  
5  
6 after assisted conception: a systematic review of controlled studies. *BMJ* 2004;328:261.  
7  
8  
9 21 Jackson RA, Gibson KA, Wu YW, et al. Perinatal outcomes in singletons following in vitro  
10  
11 fertilization: a meta-analysis. *Obstet Gynecol* 2004;103:551–63.  
12  
13  
14 22 Basatemur E, Sutcliffe A. Placenta. *Follow-Up Child Born After Art* 2008;29:135–40.  
15  
16  
17 23 Balayla J, Sheehy O, Fraser WD, et al. Neurodevelopmental outcomes after assisted  
18  
19 reproductive technologies. *Obstet Gynecol* 2017;129:265–72.  
20  
21  
22 24 Dyer S, Chambers GM, de Mouzon J, et al. International Committee for Monitoring  
23  
24 Assisted Reproductive Technologies world report: assisted Reproductive technology 2008,  
25  
26 2009, and 2010. *Hum Reprod* 2016;31:1588–609.  
27  
28  
29 25 de Mouzon J, Chambers GM, Zegers-Hochschild F, et al. International Committee for  
30  
31 Monitoring Assisted Reproductive Technologies world report: assisted reproductive  
32  
33 technology 2012. *Hum Reprod* 2020;35:1900–13.  
34  
35  
36 26 Adamson GD, de Mouzon J, Chambers G, et al. International Committee for Monitoring  
37  
38 Assisted Reproductive Technology. World report on assisted reproductive technology.  
39  
40 *ICMART World Collab Rep Assist Reprod Technol (Art)*.  
41  
42 [https://seureservercdn.net/198.71.233.206/3nz.654.myftpupload.com/wp-](https://seureservercdn.net/198.71.233.206/3nz.654.myftpupload.com/wp-content/uploads/ICMART-ESHRE-WR2017-Preliminary.pdf)  
43  
44 [content/uploads/ICMART-ESHRE-WR2017-Preliminary.pdf](https://seureservercdn.net/198.71.233.206/3nz.654.myftpupload.com/wp-content/uploads/ICMART-ESHRE-WR2017-Preliminary.pdf) (Accessed 31 Dec 2021) 2017.  
45  
46  
47 27 Ishihara O, Jwa SC, Kuwahara A, et al. Assisted reproductive technology in Japan: A  
48  
49  
50  
51  
52  
53  
54  
55  
56  
57  
58  
59  
60



- 1  
2  
3  
4  
5  
6 summary report for 2017 by the Ethics Committee of the Japan Society of Obstetrics and  
7  
8  
9 Gynecology. *Reprod Med Biol* 2019;19:3–12.  
10  
11  
12 28 Ishihara O, Araki R, Kuwahara A, et al. Impact of frozen–thawed single-blastocyst transfer  
13  
14  
15 on maternal and neonatal outcome: an analysis of 277,042 single-embryo transfer cycles  
16  
17  
18 from 2008 to 2010 in Japan. *Fertil Steril* 2014;101:128–33.  
19  
20  
21 29 Hongo K, Yagi S, Kono A. The Research on Follow-up Children's Feature in Health  
22  
23  
24 Checkup for 3-year-old Children (in Japanese). *Pediatr Health Res* 2006;65:806–13.  
25  
26  
27 30 Carson C, Kelly Y, Kurinczuk JJ, et al. Effect of pregnancy planning and fertility treatment  
28  
29  
30 on cognitive outcomes in children at ages 3 and 5: longitudinal cohort study. *BMJ*  
31  
32  
33 2011;343:d4473.  
34  
35  
36 31 Lugo-Gil J, Tamis-LeMonda CS. Family resources and parenting quality: links to children's  
37  
38  
39 cognitive development across the first 3 years. *Child Dev* 2008;79:1065–85.  
40  
41  
42 32 Hashimoto K, Ogawa K, Horikawa R, et al. Gross motor function and general development  
43  
44  
45 of babies born after assisted reproductive technology. *J Obstet Gynaecol Res*  
46  
47  
48 2016;42:266–72.  
49  
50  
51 33 Ponjaert-Kristoffersen I, Bonduelle M, Barnes J, et al. International collaborative study of  
52  
53  
54 intracytoplasmic sperm injection-conceived, in vitro fertilization-conceived, and naturally  
55  
56  
57 conceived 5-year-old child outcomes: cognitive and motor assessments. *Pediatrics*  
58  
59  
60

2005;115:e283–9.

34 Chong KC, Zhou VL, Tarazona D, et al. ASQ-3 scores are sensitive to small differences in age in a Peruvian infant population. *Child Care Health Dev* 2017;43:556–65.

35 Agarwal PK, Xie H, Sathyapalan Rema AS, et al. Evaluation of the Ages and Stages Questionnaire (ASQ 3) as a developmental screener at 9, 18, and 24 months. *Early Hum Dev* 2020;147:105081.

## Figure Legend

Figure 1. Flow chart of the exclusion criteria in the TMM BirThree Cohort Study

This flow chart describes the exclusion criteria and the number of total participants, excluded participants, and eligible participants. ASQ-3, Ages & Stages Questionnaires, Third Edition.

**Table 1.** Characteristics of the study population

|                                             | Total   |      | Infertility treatment |      |        |      |       |      | p       |
|---------------------------------------------|---------|------|-----------------------|------|--------|------|-------|------|---------|
|                                             |         |      | Natural conception    |      | OI/AIH |      | ART   |      |         |
|                                             | n=9,655 | %    | n=8,895               | %    | n=273  | %    | n=487 | %    |         |
| <b>Mother's age, mean (SD), y</b>           | 32.7    | 4.7  | 32.4                  | 4.6  | 34.3   | 3.9  | 37.2  | 3.8  | <0.0001 |
| <b>Pre-pregnancy BMI (kg/m<sup>2</sup>)</b> |         |      |                       |      |        |      |       |      |         |
| < 18.5                                      | 1,365   | 14.1 | 1,279                 | 14.4 | 36     | 13.2 | 50    | 10.3 | 0.0707  |
| 18.5 -< 25.0                                | 7,204   | 74.6 | 6,636                 | 74.6 | 196    | 72.1 | 372   | 76.3 |         |
| ≥ 25.0                                      | 1,083   | 11.2 | 977                   | 11.0 | 41     | 15.0 | 65    | 13.4 |         |
| <b>Educational level</b>                    |         |      |                       |      |        |      |       |      |         |
| High school graduate or less                | 2,711   | 28.1 | 2,565                 | 28.8 | 49     | 18.0 | 97    | 19.9 | <0.0001 |
| Junior or vocational college graduate       | 3,513   | 36.4 | 3,215                 | 36.1 | 100    | 36.6 | 198   | 40.7 |         |
| University graduate or above                | 2,722   | 28.2 | 2,457                 | 27.6 | 102    | 37.4 | 163   | 33.5 |         |
| <b>Household income (JPY/year)</b>          |         |      |                       |      |        |      |       |      |         |
| < 4,000,000                                 | 3,117   | 32.3 | 2,974                 | 33.4 | 63     | 23.1 | 80    | 16.4 | <0.0001 |
| 4,000,000 to < 6,000,000                    | 3,063   | 31.7 | 2,810                 | 31.6 | 86     | 31.5 | 167   | 34.3 |         |
| ≥ 6,000,000                                 | 2,992   | 31.0 | 2,658                 | 29.9 | 111    | 40.7 | 223   | 45.8 |         |
| <b>Cigarette smoking</b>                    |         |      |                       |      |        |      |       |      |         |
| Never                                       | 6,194   | 64.6 | 5,675                 | 64.3 | 195    | 71.4 | 324   | 66.7 | <0.0001 |
| Stopped before pregnancy                    | 2,291   | 23.9 | 2,075                 | 23.5 | 60     | 22.0 | 156   | 32.1 |         |
| Stopped after pregnancy                     | 950     | 9.9  | 928                   | 10.5 | 17     | 6.2  | 5     | 1.0  |         |
| Smoked during early pregnancy               | 152     | 1.6  | 150                   | 1.7  | 1      | 0.4  | 1     | 0.2  |         |
| <b>Alcohol consumption</b>                  |         |      |                       |      |        |      |       |      |         |

|    |                                      |       |      |       |      |     |      |     |      |         |
|----|--------------------------------------|-------|------|-------|------|-----|------|-----|------|---------|
| 1  |                                      |       |      |       |      |     |      |     |      |         |
| 2  |                                      |       |      |       |      |     |      |     |      |         |
| 3  |                                      |       |      |       |      |     |      |     |      |         |
| 4  | Drinking at early pregnancy          | 1,917 | 20.0 | 1,766 | 20.0 | 57  | 21.0 | 94  | 19.3 | 0.5426  |
| 5  | Former                               | 3,273 | 34.1 | 3,023 | 34.2 | 93  | 34.2 | 157 | 32.3 |         |
| 6  | Never                                | 3,871 | 40.3 | 3,568 | 40.4 | 105 | 38.6 | 198 | 40.7 |         |
| 7  |                                      |       |      |       |      |     |      |     |      |         |
| 8  | Cannot drink because of constitution | 536   | 5.6  | 482   | 5.5  | 17  | 6.3  | 37  | 7.6  |         |
| 9  |                                      |       |      |       |      |     |      |     |      |         |
| 10 | <b>Parity</b>                        |       |      |       |      |     |      |     |      |         |
| 11 | Nullipara                            | 4,564 | 47.3 | 4,024 | 45.2 | 202 | 74.0 | 338 | 69.4 | <0.0001 |
| 12 | Multipara                            | 5,091 | 52.7 | 4,871 | 54.8 | 71  | 26.0 | 149 | 30.6 |         |
| 13 |                                      |       |      |       |      |     |      |     |      |         |
| 14 | <b>Child's sex</b>                   |       |      |       |      |     |      |     |      |         |
| 15 | Male                                 | 4,958 | 51.4 | 4,581 | 51.5 | 137 | 50.2 | 240 | 49.3 | 0.5874  |
| 16 | Female                               | 4,697 | 48.7 | 4,314 | 48.5 | 136 | 49.8 | 247 | 50.7 |         |
| 17 |                                      |       |      |       |      |     |      |     |      |         |
| 18 | <b>Gestational age</b>               |       |      |       |      |     |      |     |      |         |
| 19 |                                      |       |      |       |      |     |      |     |      |         |
| 20 | ≥37                                  | 9,017 | 93.4 | 8,338 | 93.7 | 245 | 89.7 | 434 | 89.1 | <0.0001 |
| 21 | < 37                                 | 638   | 6.6  | 557   | 6.3  | 28  | 10.3 | 53  | 10.9 |         |
| 22 |                                      |       |      |       |      |     |      |     |      |         |
| 23 | <b>Birth weight (g)</b>              |       |      |       |      |     |      |     |      |         |
| 24 |                                      |       |      |       |      |     |      |     |      |         |
| 25 | ≥2,500                               | 8,689 | 90.0 | 8,037 | 90.4 | 229 | 83.9 | 423 | 86.9 | 0.0004  |
| 26 | < 2,500                              | 952   | 9.9  | 844   | 9.5  | 44  | 16.1 | 64  | 13.1 |         |
| 27 |                                      |       |      |       |      |     |      |     |      |         |
| 28 | <b>Birth defect</b>                  |       |      |       |      |     |      |     |      |         |
| 29 | No                                   | 9,477 | 98.3 | 8,740 | 98.4 | 269 | 98.5 | 468 | 96.1 | 0.0033  |
| 30 | Yes                                  | 169   | 1.8  | 146   | 1.6  | 4   | 1.5  | 19  | 3.9  |         |
| 31 |                                      |       |      |       |      |     |      |     |      |         |
| 32 | <b>Multiple birth</b>                |       |      |       |      |     |      |     |      |         |
| 33 | No                                   | 9,440 | 97.8 | 8,746 | 98.3 | 244 | 89.4 | 450 | 92.4 | <0.0001 |
| 34 | Yes                                  | 215   | 2.2  | 149   | 1.7  | 29  | 10.6 | 37  | 7.6  |         |
| 35 |                                      |       |      |       |      |     |      |     |      |         |
| 36 |                                      |       |      |       |      |     |      |     |      |         |
| 37 |                                      |       |      |       |      |     |      |     |      |         |
| 38 |                                      |       |      |       |      |     |      |     |      |         |
| 39 |                                      |       |      |       |      |     |      |     |      |         |
| 40 |                                      |       |      |       |      |     |      |     |      |         |
| 41 |                                      |       |      |       |      |     |      |     |      |         |
| 42 |                                      |       |      |       |      |     |      |     |      |         |
| 43 |                                      |       |      |       |      |     |      |     |      |         |
| 44 |                                      |       |      |       |      |     |      |     |      |         |
| 45 |                                      |       |      |       |      |     |      |     |      |         |
| 46 |                                      |       |      |       |      |     |      |     |      |         |

1  
2  
3  
4  
5  
6  
7  
8  
9  
10  
11  
12  
13  
14  
15  
16  
17  
18  
19  
20  
21  
22  
23  
24  
25  
26  
27  
28  
29  
30  
31  
32  
33  
34  
35  
36  
37  
38  
39  
40  
41  
42  
43  
44  
45  
46

**ASQ-3 (2Y)**

|             |       |      |       |      |     |      |     |      |         |
|-------------|-------|------|-------|------|-----|------|-----|------|---------|
| > Mean -2SD | 8,218 | 85.1 | 7,626 | 85.7 | 215 | 78.8 | 377 | 77.4 | <0.0001 |
| ≤ Mean -2SD | 1,437 | 14.9 | 1,269 | 14.3 | 58  | 21.3 | 110 | 22.6 |         |

**ASQ-3 (3.5Y)**

|             |       |      |       |      |     |      |     |      |        |
|-------------|-------|------|-------|------|-----|------|-----|------|--------|
| > Mean -2SD | 8,398 | 87.0 | 7,746 | 87.1 | 233 | 85.4 | 419 | 86.0 | 0.5749 |
| ≤ Mean -2SD | 1,257 | 13.0 | 1,149 | 12.9 | 40  | 14.7 | 68  | 14.0 |        |

**Father's age, mean (SD), y**

|         |         |       |         |
|---------|---------|-------|---------|
| n=4,183 | n=3,784 | n=142 | n=257   |
| 34.5    | 5.7     | 34.2  | 5.6     |
|         |         | 35.1  | 4.8     |
|         |         |       | 38.8    |
|         |         |       | 5.2     |
|         |         |       | <0.0001 |

---

Standard deviation: SD, Body mass index: BMI, Ovulation induction: OI, Artificial Insemination with husband's semen: AIH.  
 Assisted reproductive technology: ART, Ages & Stages Questionnaires, Third Edition: ASQ-3.

**Table 2.** Odds ratios (95% CIs) from logistic regression models for infertility treatment and children's neurodevelopment at the age of 2 and 3.5 years (n=9,655)

|                    | N     | 2 years |       |       |        |       |          |        |       |       | 3.5 years |       |        |       |          |        |       |
|--------------------|-------|---------|-------|-------|--------|-------|----------|--------|-------|-------|-----------|-------|--------|-------|----------|--------|-------|
|                    |       | n       | %     | Crude |        |       | Adjusted |        |       | n     | %         | Crude |        |       | Adjusted |        |       |
|                    |       |         |       | OR    | 95% CI |       | OR       | 95% CI |       |       |           | OR    | 95% CI |       | OR       | 95% CI |       |
|                    |       |         |       |       | Lower  | Upper |          | Lower  | Upper |       |           |       | Lower  | Upper |          | Lower  | Upper |
| Total score        |       |         |       |       |        |       |          |        |       |       |           |       |        |       |          |        |       |
| Natural conception | 8,895 | 1,269   | 14.27 | ref   |        |       | ref      |        |       | 1,149 | 12.92     | ref   |        |       | ref      |        |       |
| OI/AIH             | 273   | 58      | 21.25 | 1.62  | 1.21   | 2.18  | 1.36     | 1.00   | 1.85  | 40    | 14.65     | 1.16  | 0.82   | 1.63  | 1.13     | 0.79   | 1.61  |
| ART                | 487   | 110     | 22.59 | 1.75  | 1.41   | 2.19  | 1.36     | 1.07   | 1.72  | 68    | 13.96     | 1.09  | 0.84   | 1.42  | 1.03     | 0.78   | 1.37  |
| Communication      |       |         |       |       |        |       |          |        |       |       |           |       |        |       |          |        |       |
| Natural conception | 8,895 | 445     | 5.00  | ref   |        |       | ref      |        |       | 482   | 5.42      | ref   |        |       | ref      |        |       |
| OI/AIH             | 273   | 27      | 9.89  | 2.09  | 1.39   | 3.14  | 1.93     | 1.25   | 2.98  | 17    | 6.23      | 1.16  | 0.70   | 1.91  | 1.13     | 0.68   | 1.90  |
| ART                | 487   | 27      | 5.54  | 1.12  | 0.75   | 1.66  | 0.95     | 0.62   | 1.45  | 29    | 5.95      | 1.11  | 0.75   | 1.63  | 1.04     | 0.69   | 1.56  |
| Gross motor        |       |         |       |       |        |       |          |        |       |       |           |       |        |       |          |        |       |
| Natural conception | 8,895 | 483     | 5.43  | ref   |        |       | ref      |        |       | 367   | 4.13      | ref   |        |       | ref      |        |       |
| OI/AIH             | 273   | 20      | 7.33  | 1.38  | 0.87   | 2.19  | 1.15     | 0.72   | 1.85  | 16    | 5.86      | 1.45  | 0.86   | 2.42  | 1.26     | 0.74   | 2.13  |
| ART                | 487   | 49      | 10.06 | 1.95  | 1.43   | 2.65  | 1.50     | 1.08   | 2.09  | 25    | 5.13      | 1.26  | 0.83   | 1.91  | 1.03     | 0.67   | 1.60  |
| Fine motor         |       |         |       |       |        |       |          |        |       |       |           |       |        |       |          |        |       |
| Natural conception | 8,895 | 389     | 4.37  | ref   |        |       | ref      |        |       | 513   | 5.77      | ref   |        |       | ref      |        |       |
| OI/AIH             | 273   | 17      | 6.23  | 1.45  | 0.88   | 2.40  | 1.28     | 0.76   | 2.13  | 19    | 6.96      | 1.22  | 0.76   | 1.97  | 1.20     | 0.74   | 1.96  |
| ART                | 487   | 34      | 6.98  | 1.64  | 1.14   | 2.36  | 1.27     | 0.86   | 1.86  | 31    | 6.37      | 1.11  | 0.76   | 1.62  | 1.05     | 0.71   | 1.56  |
| Problem solving    |       |         |       |       |        |       |          |        |       |       |           |       |        |       |          |        |       |
| Natural conception | 8,895 | 354     | 3.98  | ref   |        |       | ref      |        |       | 505   | 5.68      | ref   |        |       | ref      |        |       |

1  
2  
3  
4  
5  
6  
7  
8  
9  
10  
11  
12  
13  
14  
15  
16  
17  
18  
19  
20  
21  
22  
23  
24  
25  
26  
27  
28  
29  
30  
31  
32  
33  
34  
35  
36  
37  
38  
39  
40  
41  
42  
43  
44  
45  
46

|  |                    |       |     |      |      |      |      |      |      |      |     |      |      |      |      |      |      |      |
|--|--------------------|-------|-----|------|------|------|------|------|------|------|-----|------|------|------|------|------|------|------|
|  | OI/AIH             | 273   | 13  | 4.76 | 1.21 | 0.68 | 2.13 | 0.90 | 0.50 | 1.60 | 18  | 6.59 | 1.17 | 0.72 | 1.91 | 1.20 | 0.73 | 1.98 |
|  | ART                | 487   | 32  | 6.57 | 1.70 | 1.17 | 2.47 | 1.18 | 0.79 | 1.75 | 27  | 5.54 | 0.98 | 0.66 | 1.45 | 0.91 | 0.60 | 1.38 |
|  | Personal-social    |       |     |      |      |      |      |      |      |      |     |      |      |      |      |      |      |      |
|  | Natural conception | 8,895 | 449 | 5.05 | ref  |      |      | ref  |      |      | 400 | 4.5  | ref  |      |      | ref  |      |      |
|  | OI/AIH             | 273   | 24  | 8.79 | 1.81 | 1.18 | 2.79 | 1.46 | 0.93 | 2.28 | 16  | 5.86 | 1.32 | 0.79 | 2.21 | 1.20 | 0.70 | 2.04 |
|  | ART                | 487   | 42  | 8.62 | 1.78 | 1.28 | 2.47 | 1.25 | 0.88 | 1.77 | 28  | 5.75 | 1.30 | 0.87 | 1.92 | 1.05 | 0.69 | 1.60 |

Confidence interval: CI, odds ratio: OR, Ovulation induction: OI, Artificial Insemination with husband's semen: AIH, Assisted reproductive technology: ART

Multivariable logistic models were adjusted for maternal age, parity, gestational week, child sex, birth defect, multiple birth, maternal education level, and household income.

For peer review only

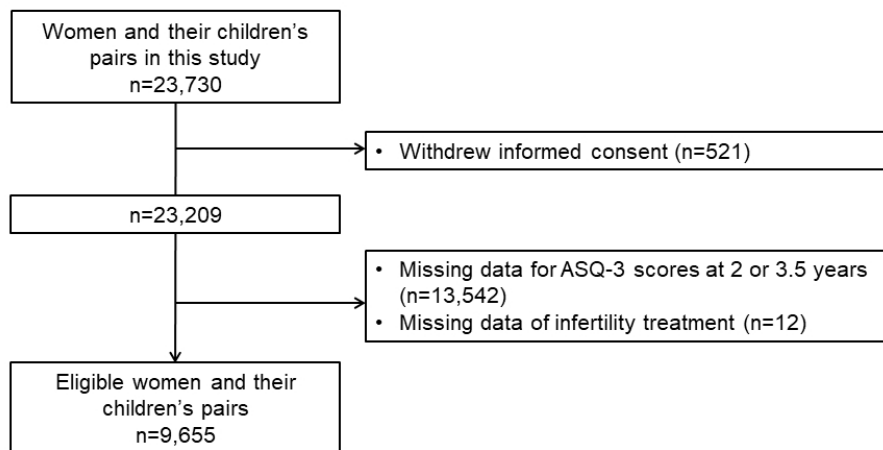

Figure 1. Flow chart of the exclusion criteria in the TMM BirThree Cohort Study

254x190mm (96 x 96 DPI)



Table S1. Characteristics of the study population

|                                               | Total   |      | Infertility treatment |      |       |      |       |      |       |      |       |      |         |  | P |
|-----------------------------------------------|---------|------|-----------------------|------|-------|------|-------|------|-------|------|-------|------|---------|--|---|
|                                               |         |      | Natural conception    |      | OI    |      | AIH   |      | IVF   |      | ICSI  |      |         |  |   |
|                                               | n=9,655 | %    | n=8,895               | %    | n=147 | %    | n=126 | %    | n=342 | %    | n=145 | %    |         |  |   |
| <b>Mother's age, mean (SD), y</b>             | 32.7    | 4.7  | 32.4                  | 4.6  | 33.1  | 3.7  | 35.6  | 3.7  | 37.1  | 3.7  | 37.3  | 3.9  | <0.0001 |  |   |
| <b>Pre-pregnancy BMI (kg/m<sup>2</sup>)</b>   |         |      |                       |      |       |      |       |      |       |      |       |      |         |  |   |
| < 18.5                                        | 1,365   | 14.1 | 1,279                 | 14.4 | 16    | 10.9 | 20    | 15.9 | 29    | 8.5  | 21    | 14.5 | 0.0283  |  |   |
| 18.5 to < 25.0                                | 7,204   | 74.6 | 6,636                 | 74.6 | 104   | 70.8 | 92    | 73.0 | 261   | 76.3 | 111   | 76.6 |         |  |   |
| ≥ 25.0                                        | 1,083   | 11.2 | 977                   | 11.0 | 27    | 18.4 | 14    | 11.1 | 52    | 15.2 | 13    | 9.0  |         |  |   |
| <b>Educational level</b>                      |         |      |                       |      |       |      |       |      |       |      |       |      |         |  |   |
| High school graduate or less                  | 2,711   | 28.1 | 2,565                 | 28.8 | 28    | 19.1 | 21    | 16.7 | 74    | 21.6 | 23    | 15.9 | <0.0001 |  |   |
| Junior college or vocational college graduate | 3,513   | 36.4 | 3,215                 | 36.1 | 51    | 34.7 | 49    | 38.9 | 135   | 39.5 | 63    | 43.5 |         |  |   |
| University graduate or above                  | 2,722   | 28.2 | 2,457                 | 27.6 | 56    | 38.1 | 46    | 36.5 | 111   | 32.5 | 52    | 35.9 |         |  |   |
| <b>Household income (JPY/year)</b>            |         |      |                       |      |       |      |       |      |       |      |       |      |         |  |   |
| < 4,000,000                                   | 3,117   | 32.3 | 2,974                 | 33.4 | 42    | 28.6 | 21    | 16.7 | 64    | 18.7 | 16    | 11.0 | <0.0001 |  |   |
| 4,000,000 to < 6,000,000                      | 3,063   | 31.7 | 2,810                 | 31.6 | 37    | 25.2 | 49    | 38.9 | 120   | 35.1 | 47    | 32.4 |         |  |   |
| ≥ 6,000,000                                   | 2,992   | 31.0 | 2,658                 | 29.9 | 62    | 42.2 | 49    | 38.9 | 145   | 42.4 | 78    | 53.8 |         |  |   |
| <b>Cigarette smoking</b>                      |         |      |                       |      |       |      |       |      |       |      |       |      |         |  |   |
| Never                                         | 6,194   | 64.6 | 5,675                 | 64.3 | 100   | 68.0 | 95    | 75.4 | 221   | 64.8 | 103   | 71.0 | <0.0001 |  |   |
| Stopped before pregnancy                      | 2,291   | 23.9 | 2,075                 | 23.5 | 31    | 21.1 | 29    | 23.0 | 115   | 33.7 | 41    | 28.3 |         |  |   |
| Stopped after pregnancy                       | 950     | 9.9  | 928                   | 10.5 | 15    | 10.2 | 2     | 1.6  | 5     | 1.5  | 0     | 0.0  |         |  |   |
| Smoking at early pregnancy                    | 152     | 1.6  | 150                   | 1.7  | 1     | 0.7  | 0     | 0.0  | 0     | 0.0  | 1     | 0.7  |         |  |   |
| <b>Alcohol drinking</b>                       |         |      |                       |      |       |      |       |      |       |      |       |      |         |  |   |
| Drinking at early pregnancy                   | 1,917   | 20.0 | 1,766                 | 20.0 | 25    | 17.0 | 32    | 25.6 | 75    | 22.0 | 19    | 13.1 | 0.0741  |  |   |
| Former                                        | 3,273   | 34.1 | 3,023                 | 34.2 | 55    | 37.4 | 38    | 30.4 | 112   | 32.8 | 45    | 31.0 |         |  |   |
| Never                                         | 3,871   | 40.3 | 3,568                 | 40.4 | 54    | 36.7 | 51    | 40.8 | 128   | 37.5 | 70    | 48.3 |         |  |   |
| Cannot drink because of constitution          | 536     | 5.6  | 482                   | 5.5  | 13    | 8.8  | 4     | 3.2  | 26    | 7.6  | 11    | 7.6  |         |  |   |
| <b>Parity</b>                                 |         |      |                       |      |       |      |       |      |       |      |       |      |         |  |   |
| Nullipara                                     | 4,564   | 47.3 | 4,024                 | 45.2 | 100   | 68.0 | 102   | 81.0 | 242   | 70.8 | 96    | 66.2 | <0.0001 |  |   |
| Multipara                                     | 5,091   | 52.7 | 4,871                 | 54.8 | 47    | 32.0 | 24    | 19.1 | 100   | 29.2 | 49    | 33.8 |         |  |   |
| <b>Child sex</b>                              |         |      |                       |      |       |      |       |      |       |      |       |      |         |  |   |
| Male                                          | 4,958   | 51.4 | 4,581                 | 51.5 | 84    | 57.1 | 53    | 42.1 | 158   | 46.2 | 82    | 56.6 | 0.0205  |  |   |
| Female                                        | 4,697   | 48.7 | 4,314                 | 48.5 | 63    | 42.9 | 73    | 57.9 | 184   | 53.8 | 63    | 43.5 |         |  |   |
| <b>Gestational week</b>                       |         |      |                       |      |       |      |       |      |       |      |       |      |         |  |   |
| ≥37                                           | 9,017   | 93.4 | 8,338                 | 93.7 | 130   | 88.4 | 115   | 91.3 | 302   | 88.3 | 132   | 91.0 | <0.0001 |  |   |
| < 37                                          | 638     | 6.6  | 557                   | 6.3  | 17    | 11.6 | 11    | 8.7  | 40    | 11.7 | 13    | 9.0  |         |  |   |
| <b>Birth weight (g)</b>                       |         |      |                       |      |       |      |       |      |       |      |       |      |         |  |   |
| ≥2,500                                        | 8,689   | 90.0 | 8,037                 | 90.4 | 126   | 85.7 | 103   | 81.8 | 294   | 86.0 | 129   | 89.0 | 0.0039  |  |   |
| < 2,500                                       | 952     | 9.9  | 844                   | 9.5  | 21    | 14.3 | 23    | 18.3 | 48    | 14.0 | 16    | 11.0 |         |  |   |
| <b>Birth defect</b>                           |         |      |                       |      |       |      |       |      |       |      |       |      |         |  |   |
| No                                            | 9,477   | 98.3 | 8,740                 | 98.4 | 145   | 98.6 | 124   | 98.4 | 330   | 96.5 | 138   | 95.2 | 0.005   |  |   |
| Yes                                           | 169     | 1.8  | 146                   | 1.6  | 2     | 1.4  | 2     | 1.6  | 12    | 3.5  | 7     | 4.8  |         |  |   |
| <b>Multiple birth</b>                         |         |      |                       |      |       |      |       |      |       |      |       |      |         |  |   |
| No                                            | 9,440   | 97.8 | 8,746                 | 98.3 | 128   | 87.1 | 116   | 92.1 | 311   | 90.9 | 139   | 95.9 | <0.0001 |  |   |
| Yes                                           | 215     | 2.2  | 149                   | 1.7  | 19    | 12.9 | 10    | 7.9  | 31    | 9.1  | 6     | 4.1  |         |  |   |
| <b>ASQ-3 (2Y)</b>                             |         |      |                       |      |       |      |       |      |       |      |       |      |         |  |   |
| > Mean -2SD                                   | 8,218   | 85.1 | 7,626                 | 85.7 | 119   | 81.0 | 96    | 76.2 | 265   | 77.5 | 112   | 77.2 | <0.0001 |  |   |
| ≤ Mean-2SD                                    | 1,437   | 14.9 | 1,269                 | 14.3 | 28    | 19.1 | 30    | 23.8 | 77    | 22.5 | 33    | 22.8 |         |  |   |
| <b>ASQ-3 (3.5Y)</b>                           |         |      |                       |      |       |      |       |      |       |      |       |      |         |  |   |
| > Mean -2SD                                   | 8,398   | 87.0 | 7,746                 | 87.1 | 127   | 86.4 | 106   | 84.1 | 295   | 86.3 | 124   | 85.5 | 0.8329  |  |   |
| ≤ Mean-2SD                                    | 1,257   | 13.0 | 1,149                 | 12.9 | 20    | 13.6 | 20    | 15.9 | 47    | 13.7 | 21    | 14.5 |         |  |   |
| <b>Father's age, mean (SD), y</b>             | n=4,183 |      | n=3,784               |      | n=74  |      | n=68  |      | n=172 |      | n=85  |      |         |  |   |
|                                               | 34.5    | 5.7  | 34.2                  | 5.6  | 34.3  | 4.7  | 35.9  | 4.7  | 38.5  | 5.4  | 39.6  | 4.9  | <0.0001 |  |   |

Standard deviation: SD, Body mass index: BMI, Ovulation induction: OI, Artificial Insemination with husband's semen: AIH, In vitro fertilization: IVF, intracytoplasmic sperm injection: ICSI, Ages & Stages Questionnaires, Third Edition: ASQ-3.

**Table S2.** Odds ratios (95% CIs) from logistic regression models for infertility treatment and children’s neurodevelopment at the age of 2 and 3.5 years (n=9,655)

|                        | 2 years |       |       |       |        |       |          |        |       |       | 3.5 years |       |        |       |          |        |      |      |
|------------------------|---------|-------|-------|-------|--------|-------|----------|--------|-------|-------|-----------|-------|--------|-------|----------|--------|------|------|
|                        | N       | n     | %     | Crude |        |       | Adjusted |        |       | n     | %         | Crude |        |       | Adjusted |        |      |      |
|                        |         |       |       | OR    | 95% CI |       | OR       | 95% CI |       |       |           | OR    | 95% CI |       | OR       | 95% CI |      |      |
|                        |         |       |       | Lower | Upper  | Lower | Upper    | Lower  | Upper |       |           | Lower | Upper  | Lower | Upper    | Upper  |      |      |
| <b>Total score</b>     |         |       |       |       |        |       |          |        |       |       |           |       |        |       |          |        |      |      |
| Natural conception     | 8,895   | 1,269 | 14.27 | ref   |        |       |          | ref    |       | 1,149 | 12.92     | ref   |        |       |          | ref    |      |      |
| OI                     | 147     | 28    | 19.05 | 1.41  | 0.93   | 2.14  |          | 1.22   | 0.79  | 1.87  | 20        | 13.61 | 1.06   | 0.66  | 1.71     | 1.01   | 0.62 | 1.64 |
| AIH                    | 126     | 30    | 23.81 | 1.88  | 1.24   | 2.84  |          | 1.53   | 0.99  | 2.34  | 20        | 15.87 | 1.27   | 0.79  | 2.06     | 1.29   | 0.78 | 2.13 |
| IVF                    | 342     | 77    | 22.51 | 1.75  | 1.35   | 2.27  |          | 1.34   | 1.02  | 1.76  | 47        | 13.74 | 1.07   | 0.79  | 1.47     | 1.02   | 0.73 | 1.42 |
| ICSI                   | 145     | 33    | 22.76 | 1.77  | 1.20   | 2.62  |          | 1.41   | 0.94  | 2.11  | 21        | 14.48 | 1.14   | 0.72  | 1.82     | 1.07   | 0.66 | 1.74 |
| <b>Communication</b>   |         |       |       |       |        |       |          |        |       |       |           |       |        |       |          |        |      |      |
| Natural conception     | 8,895   | 445   | 5     | ref   |        |       |          | ref    |       | 482   | 5.42      | ref   |        |       |          | ref    |      |      |
| OI                     | 147     | 16    | 10.88 | 2.32  | 1.37   | 3.93  |          | 2.12   | 1.22  | 3.69  | 9         | 6.12  | 1.14   | 0.58  | 2.25     | 1.05   | 0.52 | 2.12 |
| AIH                    | 126     | 11    | 8.73  | 1.82  | 0.97   | 3.40  |          | 1.71   | 0.88  | 3.30  | 8         | 6.35  | 1.18   | 0.58  | 2.44     | 1.23   | 0.59 | 2.59 |
| IVF                    | 342     | 19    | 5.56  | 1.12  | 0.70   | 1.79  |          | 0.94   | 0.57  | 1.54  | 20        | 5.85  | 1.08   | 0.68  | 1.72     | 1.02   | 0.63 | 1.64 |
| ICSI                   | 145     | 8     | 5.52  | 1.11  | 0.54   | 2.28  |          | 0.98   | 0.47  | 2.05  | 9         | 6.21  | 1.16   | 0.59  | 2.28     | 1.10   | 0.55 | 2.20 |
| <b>Gross motor</b>     |         |       |       |       |        |       |          |        |       |       |           |       |        |       |          |        |      |      |
| Natural conception     | 8,895   | 483   | 5.43  | ref   |        |       |          | ref    |       | 367   | 4.13      | ref   |        |       |          | ref    |      |      |
| OI                     | 147     | 7     | 4.76  | 0.87  | 0.41   | 1.87  |          | 0.76   | 0.35  | 1.64  | 8         | 5.44  | 1.34   | 0.65  | 2.75     | 1.19   | 0.57 | 2.48 |
| AIH                    | 126     | 13    | 10.32 | 2.00  | 1.12   | 3.58  |          | 1.59   | 0.88  | 2.89  | 8         | 6.35  | 1.58   | 0.76  | 3.25     | 1.32   | 0.63 | 2.77 |
| IVF                    | 342     | 32    | 9.36  | 1.80  | 1.24   | 2.62  |          | 1.38   | 0.93  | 2.05  | 14        | 4.09  | 0.99   | 0.58  | 1.71     | 0.80   | 0.45 | 1.40 |
| ICSI                   | 145     | 17    | 11.72 | 2.31  | 1.38   | 3.87  |          | 1.81   | 1.07  | 3.07  | 11        | 7.59  | 1.91   | 1.02  | 3.56     | 1.64   | 0.87 | 3.12 |
| <b>Fine motor</b>      |         |       |       |       |        |       |          |        |       |       |           |       |        |       |          |        |      |      |
| Natural conception     | 8,895   | 389   | 4.37  | ref   |        |       |          | ref    |       | 513   | 5.77      | ref   |        |       |          | ref    |      |      |
| OI                     | 147     | 7     | 4.76  | 1.09  | 0.51   | 2.35  |          | 1.02   | 0.47  | 2.22  | 10        | 6.8   | 1.19   | 0.62  | 2.28     | 1.12   | 0.58 | 2.17 |
| AIH                    | 126     | 10    | 7.94  | 1.89  | 0.98   | 3.63  |          | 1.55   | 0.80  | 3.03  | 9         | 7.14  | 1.26   | 0.63  | 2.49     | 1.29   | 0.64 | 2.62 |
| IVF                    | 342     | 27    | 7.89  | 1.87  | 1.25   | 2.81  |          | 1.45   | 0.95  | 2.22  | 18        | 5.26  | 0.91   | 0.56  | 1.47     | 0.86   | 0.52 | 1.43 |
| ICSI                   | 145     | 7     | 4.83  | 1.11  | 0.52   | 2.39  |          | 0.87   | 0.40  | 1.89  | 13        | 8.97  | 1.61   | 0.90  | 2.86     | 1.49   | 0.82 | 2.70 |
| <b>Problem solving</b> |         |       |       |       |        |       |          |        |       |       |           |       |        |       |          |        |      |      |
| Natural conception     | 8,895   | 354   | 3.98  | ref   |        |       |          | ref    |       | 505   | 5.68      | ref   |        |       |          | ref    |      |      |
| OI                     | 147     | 6     | 4.08  | 1.03  | 0.45   | 2.34  |          | 0.80   | 0.34  | 1.84  | 9         | 6.12  | 1.08   | 0.55  | 2.14     | 1.12   | 0.56 | 2.23 |
| AIH                    | 126     | 7     | 5.56  | 1.42  | 0.66   | 3.06  |          | 1.00   | 0.46  | 2.20  | 9         | 7.14  | 1.28   | 0.65  | 2.53     | 1.31   | 0.65 | 2.64 |
| IVF                    | 342     | 22    | 6.43  | 1.66  | 1.06   | 2.59  |          | 1.13   | 0.70  | 1.80  | 20        | 5.85  | 1.03   | 0.65  | 1.64     | 0.98   | 0.60 | 1.57 |
| ICSI                   | 145     | 10    | 6.9   | 1.79  | 0.93   | 3.43  |          | 1.31   | 0.67  | 2.55  | 7         | 4.83  | 0.84   | 0.39  | 1.81     | 0.76   | 0.35 | 1.66 |
| <b>Personal-social</b> |         |       |       |       |        |       |          |        |       |       |           |       |        |       |          |        |      |      |
| Natural conception     | 8,895   | 449   | 5.05  | ref   |        |       |          | ref    |       | 400   | 4.5       | ref   |        |       |          | ref    |      |      |
| OI                     | 147     | 10    | 6.8   | 1.37  | 0.72   | 2.63  |          | 1.17   | 0.60  | 2.27  | 8         | 5.44  | 1.22   | 0.60  | 2.51     | 1.13   | 0.54 | 2.35 |
| AIH                    | 126     | 14    | 11.11 | 2.35  | 1.34   | 4.13  |          | 1.77   | 0.99  | 3.19  | 8         | 6.35  | 1.44   | 0.70  | 2.97     | 1.28   | 0.60 | 2.70 |
| IVF                    | 342     | 26    | 7.6   | 1.55  | 1.03   | 2.33  |          | 1.09   | 0.71  | 1.68  | 20        | 5.85  | 1.32   | 0.83  | 2.10     | 1.09   | 0.67 | 1.78 |
| ICSI                   | 145     | 16    | 11.03 | 2.33  | 1.38   | 3.96  |          | 1.63   | 0.94  | 2.82  | 8         | 5.52  | 1.24   | 0.60  | 2.55     | 0.97   | 0.46 | 2.02 |

Confidence interval: CI, odds ratio: OR, Ovulation induction: OI, Artificial Insemination with husband’s semen: AIH, In vitro fertilization: IVF, intracytoplasmic sperm injection: ICSI.

Multivariable logistic models were adjusted for maternal age, parity, gestational week, child sex, birth defect, multiple birth, maternal education level, and household income.

Table S3. Characteristics of study population for ET

|                                               | Total   |      | Natural conception |      | ART (n=485) |      |                  |      |         |      | P       |
|-----------------------------------------------|---------|------|--------------------|------|-------------|------|------------------|------|---------|------|---------|
|                                               | n=9,382 | %    | n=8,895            | %    | Fresh ET    |      | Frozen-thawed ET |      | Missing |      |         |
|                                               |         |      |                    |      | n=46        | %    | n=314            | %    | n=127   | %    |         |
| <b>Mother's age, mean (SD), y</b>             | 32.7    | 4.7  | 32.4               | 4.6  | 37.8        | 3.6  | 37.3             | 3.8  | 36.8    | 3.6  | <0.0001 |
| <b>Pre-pregnancy BMI (kg/m<sup>2</sup>)</b>   |         |      |                    |      |             |      |                  |      |         |      |         |
| < 18.5                                        | 1,329   | 14.2 | 1,279              | 14.4 | 9           | 19.6 | 30               | 9.6  | 11      | 8.7  | 0.2997  |
| 18.5 to < 25.0                                | 7,008   | 74.7 | 6,636              | 74.6 | 32          | 69.6 | 242              | 77.1 | 98      | 77.2 |         |
| ≥ 25.0                                        | 1,042   | 11.1 | 977                | 11.0 | 5           | 10.9 | 42               | 13.4 | 18      | 14.2 |         |
| <b>Educational level</b>                      |         |      |                    |      |             |      |                  |      |         |      |         |
| High school graduate or less                  | 2,662   | 28.4 | 2,565              | 28.8 | 9           | 19.6 | 64               | 20.4 | 24      | 18.9 | 0.0018  |
| Junior college or vocational college graduate | 3,413   | 36.4 | 3,215              | 36.1 | 23          | 50.0 | 122              | 38.9 | 53      | 41.7 |         |
| University graduate or above                  | 2,620   | 27.9 | 2,457              | 27.6 | 12          | 26.1 | 111              | 35.4 | 40      | 31.5 |         |
| <b>Household income (JPY/year)</b>            |         |      |                    |      |             |      |                  |      |         |      |         |
| < 4,000,000                                   | 3,054   | 32.6 | 2,974              | 33.4 | 6           | 13.0 | 53               | 16.9 | 21      | 16.5 | <0.0001 |
| 4,000,000 to < 6,000,000                      | 2,977   | 31.7 | 2,810              | 31.6 | 16          | 34.8 | 108              | 34.4 | 43      | 33.9 |         |
| ≥ 6,000,000                                   | 2,881   | 30.7 | 2,658              | 29.9 | 22          | 47.8 | 144              | 45.9 | 57      | 44.9 |         |
| <b>Cigarette smoking</b>                      |         |      |                    |      |             |      |                  |      |         |      |         |
| Never                                         | 5,999   | 64.4 | 5,675              | 64.3 | 24          | 52.2 | 209              | 66.8 | 91      | 71.7 | <0.0001 |
| Stopped before pregnancy                      | 2,231   | 24.0 | 2,075              | 23.5 | 22          | 47.8 | 99               | 31.6 | 35      | 27.6 |         |
| Stopped after pregnancy                       | 933     | 10.0 | 928                | 10.5 | 0           | 0.0  | 4                | 1.3  | 1       | 0.8  |         |
| Smoking at early pregnancy                    | 151     | 1.6  | 150                | 1.7  | 0           | 0.0  | 1                | 0.3  | 0       | 0.0  |         |
| <b>Alcohol drinking</b>                       |         |      |                    |      |             |      |                  |      |         |      |         |
| Drinking at early pregnancy                   | 1,860   | 20.0 | 1,766              | 20.0 | 6           | 13.0 | 60               | 19.2 | 28      | 22.1 | 0.2181  |
| Former                                        | 3,180   | 34.1 | 3,023              | 34.2 | 22          | 47.8 | 98               | 31.3 | 37      | 29.1 |         |
| Never                                         | 3,766   | 40.4 | 3,568              | 40.4 | 16          | 34.8 | 128              | 40.9 | 54      | 42.5 |         |
| Cannot drink because of constitution          | 519     | 5.6  | 482                | 5.5  | 2           | 4.4  | 27               | 8.6  | 8       | 6.3  |         |
| <b>Parity</b>                                 |         |      |                    |      |             |      |                  |      |         |      |         |
| Nullipara                                     | 4,362   | 46.5 | 4,024              | 45.2 | 35          | 76.1 | 212              | 67.5 | 91      | 71.7 | <0.0001 |
| Multipara                                     | 5,020   | 53.5 | 4,871              | 54.8 | 11          | 23.9 | 102              | 32.5 | 36      | 28.4 |         |
| <b>Child sex</b>                              |         |      |                    |      |             |      |                  |      |         |      |         |
| Male                                          | 4,821   | 51.4 | 4,581              | 51.5 | 22          | 47.8 | 156              | 49.7 | 62      | 48.8 | 0.806   |
| Female                                        | 4,561   | 48.6 | 4,314              | 48.5 | 24          | 52.2 | 158              | 50.3 | 65      | 51.2 |         |
| <b>Gestational week</b>                       |         |      |                    |      |             |      |                  |      |         |      |         |
| ≥37                                           | 8,772   | 93.5 | 8,338              | 93.7 | 38          | 82.6 | 285              | 90.8 | 111     | 87.4 | <0.0001 |
| < 37                                          | 610     | 6.5  | 557                | 6.3  | 8           | 17.4 | 29               | 9.2  | 16      | 12.6 |         |
| <b>Birth weight (g)</b>                       |         |      |                    |      |             |      |                  |      |         |      |         |
| ≥2,500                                        | 8,460   | 90.2 | 8,037              | 90.4 | 41          | 89.1 | 277              | 88.2 | 105     | 82.7 | 0.0814  |
| < 2,500                                       | 908     | 9.7  | 844                | 9.5  | 5           | 10.9 | 37               | 11.8 | 22      | 17.3 |         |
| <b>Birth defect</b>                           |         |      |                    |      |             |      |                  |      |         |      |         |
| No                                            | 9,208   | 98.2 | 8,740              | 98.4 | 45          | 97.8 | 302              | 96.2 | 121     | 95.3 | 0.0019  |
| Yes                                           | 165     | 1.8  | 146                | 1.6  | 1           | 2.2  | 12               | 3.8  | 6       | 4.7  |         |
| <b>Multiple birth</b>                         |         |      |                    |      |             |      |                  |      |         |      |         |
| No                                            | 9,196   | 98.0 | 8,746              | 98.3 | 42          | 91.3 | 287              | 91.4 | 121     | 95.3 | <0.0001 |
| Yes                                           | 186     | 2.0  | 149                | 1.7  | 4           | 8.7  | 27               | 8.6  | 6       | 4.7  |         |
| <b>ASQ-3 (2Y)</b>                             |         |      |                    |      |             |      |                  |      |         |      |         |
| > Mean -2SD                                   | 8,003   | 85.3 | 7,626              | 85.7 | 33          | 71.7 | 242              | 77.1 | 102     | 80.3 | <0.0001 |
| ≤ Mean-2SD                                    | 1,379   | 14.7 | 1,269              | 14.3 | 13          | 28.3 | 72               | 22.9 | 25      | 19.7 |         |
| <b>ASQ-3 (3.5Y)</b>                           |         |      |                    |      |             |      |                  |      |         |      |         |
| > Mean -2SD                                   | 8,165   | 87.0 | 7,746              | 87.1 | 39          | 84.8 | 269              | 85.7 | 111     | 87.4 | 0.8594  |
| ≤ Mean-2SD                                    | 1,217   | 13.0 | 1,149              | 12.9 | 7           | 15.2 | 45               | 14.3 | 16      | 12.6 |         |
| <b>Father's age, mean (SD), y</b>             | n=4,041 |      | n=3,784            |      | n=25        |      | n=169            |      | n=63    |      |         |
|                                               | 34.5    | 5.7  | 34.2               | 5.6  | 38.9        | 4.1  | 38.9             | 5.3  | 38.8    | 5.4  | <0.0001 |

Standard deviation: SD, Body mass index: BMI, Embryo transfer: ET, Assisted reproductive technology: ART, Ages &amp; Stages Questionnaires, Third Edition: ASQ-3.

For peer review only - <http://bmjopen.bmj.com/site/about/guidelines.xhtml>

**Table S4.** Odds ratios (95% CIs) from logistic regression models for ET and children’s neurodevelopment at the age of 2 and 3.5 years (n=485)

|                    | 2 years |       |       |       |        |       |          |        |       | 3.5 years |       |       |        |       |          |        |       |
|--------------------|---------|-------|-------|-------|--------|-------|----------|--------|-------|-----------|-------|-------|--------|-------|----------|--------|-------|
|                    | N       | n     | %     | Crude |        |       | Adjusted |        |       | n         | %     | Crude |        |       | Adjusted |        |       |
|                    |         |       |       | OR    | 95% CI |       | OR       | 95% CI |       |           |       | OR    | 95% CI |       | OR       | 95% CI |       |
|                    |         |       |       |       | Lower  | Upper |          | Lower  | Upper |           |       |       | Lower  | Upper |          | Lower  | Upper |
| Total score        |         |       |       |       |        |       |          |        |       |           |       |       |        |       |          |        |       |
| Natural conception | 8,895   | 1,269 | 14.27 | ref   |        |       | ref      |        |       | 1,149     | 12.92 | ref   |        |       | ref      |        |       |
| Fresh ET           | 46      | 13    | 28.26 | 2.37  | 1.24   | 4.51  | 1.71     | 0.88   | 3.33  | 7         | 15.22 | 1.21  | 0.54   | 2.71  | 1.12     | 0.49   | 2.58  |
| Frozen-thawed ET   | 314     | 72    | 22.93 | 1.79  | 1.37   | 2.34  | 1.39     | 1.05   | 1.85  | 45        | 14.33 | 1.13  | 0.82   | 1.56  | 1.07     | 0.76   | 1.50  |
| Communication      |         |       |       |       |        |       |          |        |       |           |       |       |        |       |          |        |       |
| Natural conception | 8,895   | 445   | 5     | ref   |        |       | ref      |        |       | 482       | 5.42  | ref   |        |       | ref      |        |       |
| Fresh ET           | 46      | 4     | 8.7   | 1.81  | 0.65   | 5.07  | 1.43     | 0.49   | 4.19  | 1         | 2.17  | 0.39  | 0.05   | 2.82  | 0.33     | 0.04   | 2.42  |
| Frozen-thawed ET   | 314     | 16    | 5.1   | 1.02  | 0.61   | 1.70  | 0.88     | 0.52   | 1.50  | 23        | 7.32  | 1.38  | 0.89   | 2.13  | 1.28     | 0.81   | 2.02  |
| Gross motor        |         |       |       |       |        |       |          |        |       |           |       |       |        |       |          |        |       |
| Natural conception | 8,895   | 483   | 5.43  | ref   |        |       | ref      |        |       | 367       | 4.13  | ref   |        |       | ref      |        |       |
| Fresh ET           | 46      | 5     | 10.87 | 2.12  | 0.84   | 5.40  | 1.51     | 0.59   | 3.90  | 2         | 4.35  | 1.06  | 0.26   | 4.37  | 0.84     | 0.20   | 3.53  |
| Frozen-thawed ET   | 314     | 34    | 10.83 | 2.12  | 1.47   | 3.06  | 1.65     | 1.12   | 2.43  | 21        | 6.69  | 1.67  | 1.06   | 2.63  | 1.37     | 0.85   | 2.21  |
| Fine motor         |         |       |       |       |        |       |          |        |       |           |       |       |        |       |          |        |       |
| Natural conception | 8,895   | 389   | 4.37  | ref   |        |       | ref      |        |       | 513       | 5.77  | ref   |        |       | ref      |        |       |
| Fresh ET           | 46      | 3     | 6.52  | 1.53  | 0.47   | 4.94  | 1.06     | 0.32   | 3.47  | 3         | 6.52  | 1.14  | 0.35   | 3.69  | 1.11     | 0.34   | 3.67  |
| Frozen-thawed ET   | 314     | 21    | 6.69  | 1.57  | 1.00   | 2.47  | 1.21     | 0.75   | 1.94  | 19        | 6.05  | 1.05  | 0.66   | 1.69  | 1.01     | 0.62   | 1.65  |
| Problem solving    |         |       |       |       |        |       |          |        |       |           |       |       |        |       |          |        |       |
| Natural conception | 8,895   | 354   | 3.98  | ref   |        |       | ref      |        |       | 505       | 5.68  | ref   |        |       | ref      |        |       |
| Fresh ET           | 46      | 3     | 6.52  | 1.68  | 0.52   | 5.45  | 1.07     | 0.32   | 3.56  | 1         | 2.17  | 0.37  | 0.05   | 2.68  | 0.34     | 0.05   | 2.49  |
| Frozen-thawed ET   | 314     | 23    | 7.32  | 1.91  | 1.23   | 2.95  | 1.33     | 0.84   | 2.11  | 18        | 5.73  | 1.01  | 0.62   | 1.64  | 0.95     | 0.57   | 1.56  |
| Personal-social    |         |       |       |       |        |       |          |        |       |           |       |       |        |       |          |        |       |
| Natural conception | 8,895   | 449   | 5.05  | ref   |        |       | ref      |        |       | 400       | 4.5   | ref   |        |       | ref      |        |       |
| Fresh ET           | 46      | 3     | 6.52  | 1.31  | 0.41   | 4.25  | 0.82     | 0.25   | 2.74  | 2         | 4.35  | 0.97  | 0.23   | 4.00  | 0.75     | 0.18   | 3.19  |
| Frozen-thawed ET   | 314     | 36    | 11.46 | 2.44  | 1.70   | 3.49  | 1.76     | 1.20   | 2.58  | 17        | 5.41  | 1.22  | 0.74   | 2.00  | 0.99     | 0.59   | 1.66  |

Confidence interval: CI, odds ratio: OR, Embryo transfer: ET.

Multivariable logistic models were adjusted for maternal age, parity, gestational week, child sex, birth defect, multiple birth, maternal education level, and household income.

1  
2  
3  
4  
5  
6  
7  
8  
9  
10  
11  
12  
13  
14  
15  
16  
17  
18  
19  
20  
21  
22  
23  
24  
25  
26  
27  
28  
29  
30  
31  
32  
33  
34  
35  
36  
37  
38  
39  
40  
41  
42  
43  
44  
45  
46

**Table S5.** Odds ratios (95% CIs) from logistic regression models for infertility treatment and children’s neurodevelopment at the age of 2 and 3.5 years (n=9,271)

|                        | N     | n     | %     | 2 years |        |       |          |        |       | 3.5 years |        |       |          |        |       |      |      |
|------------------------|-------|-------|-------|---------|--------|-------|----------|--------|-------|-----------|--------|-------|----------|--------|-------|------|------|
|                        |       |       |       | Crude   |        |       | Adjusted |        |       | Crude     |        |       | Adjusted |        |       |      |      |
|                        |       |       |       | OR      | 95% CI |       | OR       | 95% CI |       | OR        | 95% CI |       | OR       | 95% CI |       |      |      |
|                        |       |       |       |         | Lower  | Upper |          | Lower  | Upper |           | Lower  | Upper |          | Lower  | Upper |      |      |
| <b>Total score</b>     |       |       |       |         |        |       |          |        |       |           |        |       |          |        |       |      |      |
| Natural conception     | 8,602 | 1,200 | 13.95 | ref     |        |       | ref      |        |       | 1,092     | 12.69  | ref   |          |        | ref   |      |      |
| OI/AIH                 | 239   | 48    | 20.08 | 1.55    | 1.12   | 2.14  | 1.36     | 0.98   | 1.89  | 35        | 14.64  | 1.18  | 0.82     | 1.70   | 1.20  | 0.83 | 1.75 |
| ART                    | 430   | 90    | 20.93 | 1.63    | 1.28   | 2.08  | 1.33     | 1.03   | 1.71  | 57        | 13.26  | 1.05  | 0.79     | 1.40   | 1.05  | 0.78 | 1.41 |
| <b>Communication</b>   |       |       |       |         |        |       |          |        |       |           |        |       |          |        |       |      |      |
| Natural conception     | 8,602 | 411   | 4.78  | ref     |        |       | ref      |        |       | 452       | 5.25   | ref   |          |        | ref   |      |      |
| OI/AIH                 | 239   | 19    | 7.95  | 1.72    | 1.07   | 2.78  | 1.77     | 1.08   | 2.90  | 15        | 6.28   | 1.21  | 0.71     | 2.05   | 1.30  | 0.76 | 2.23 |
| ART                    | 430   | 19    | 4.42  | 0.92    | 0.58   | 1.48  | 0.87     | 0.53   | 1.41  | 22        | 5.12   | 0.97  | 0.63     | 1.51   | 1.01  | 0.64 | 1.59 |
| <b>Gross motor</b>     |       |       |       |         |        |       |          |        |       |           |        |       |          |        |       |      |      |
| Spontaneous pregnancy  | 8,602 | 452   | 5.25  | ref     |        |       | ref      |        |       | 336       | 3.91   | ref   |          |        | ref   |      |      |
| OI/AIH                 | 239   | 17    | 7.11  | 1.38    | 0.84   | 2.28  | 1.14     | 0.69   | 1.90  | 13        | 5.44   | 1.42  | 0.80     | 2.50   | 1.26  | 0.71 | 2.24 |
| ART                    | 430   | 40    | 9.30  | 1.85    | 1.32   | 2.60  | 1.50     | 1.05   | 2.14  | 21        | 4.88   | 1.26  | 0.80     | 1.99   | 1.10  | 0.69 | 1.76 |
| <b>Fine motor</b>      |       |       |       |         |        |       |          |        |       |           |        |       |          |        |       |      |      |
| Natural conception     | 8,602 | 363   | 4.22  | ref     |        |       | ref      |        |       | 479       | 5.57   | ref   |          |        | ref   |      |      |
| OI/AIH                 | 239   | 17    | 7.11  | 1.74    | 1.05   | 2.88  | 1.51     | 0.90   | 2.52  | 16        | 6.69   | 1.22  | 0.73     | 2.04   | 1.19  | 0.70 | 2.02 |
| ART                    | 430   | 30    | 6.98  | 1.70    | 1.16   | 2.50  | 1.33     | 0.89   | 2.00  | 26        | 6.05   | 1.09  | 0.73     | 1.64   | 1.09  | 0.71 | 1.67 |
| <b>Problem solving</b> |       |       |       |         |        |       |          |        |       |           |        |       |          |        |       |      |      |
| Natural conception     | 8,602 | 326   | 3.79  | ref     |        |       | ref      |        |       | 475       | 5.52   | ref   |          |        | ref   |      |      |
| OI/AIH                 | 239   | 11    | 4.6   | 1.23    | 0.66   | 2.27  | 0.98     | 0.53   | 1.84  | 17        | 7.11   | 1.31  | 0.79     | 2.17   | 1.34  | 0.80 | 2.24 |
| ART                    | 430   | 25    | 5.81  | 1.57    | 1.03   | 2.38  | 1.20     | 0.77   | 1.85  | 22        | 5.12   | 0.92  | 0.60     | 1.43   | 0.89  | 0.57 | 1.40 |
| <b>Personal-social</b> |       |       |       |         |        |       |          |        |       |           |        |       |          |        |       |      |      |
| Natural conception     | 8,602 | 417   | 4.85  | ref     |        |       | ref      |        |       | 372       | 4.32   | ref   |          |        | ref   |      |      |
| OI/AIH                 | 239   | 21    | 8.79  | 1.89    | 1.20   | 2.99  | 1.55     | 0.97   | 2.49  | 15        | 6.28   | 1.48  | 0.87     | 2.52   | 1.35  | 0.78 | 2.34 |
| ART                    | 430   | 35    | 8.14  | 1.74    | 1.21   | 2.49  | 1.28     | 0.88   | 1.86  | 22        | 5.12   | 1.19  | 0.77     | 1.86   | 1.02  | 0.65 | 1.62 |

Confidence interval: CI, odds ratio: OR, Ovulation induction: OI, Artificial Insemination with husband’s semen: AIH, Assisted reproductive technology: ART.

Multivariable logistic models were adjusted for maternal age, parity, gestational week, childsex, maternal education level, and household income.

STROBE Statement—Checklist of items that should be included in reports of *cohort studies*

|                              | Item No | Recommendation                                                                                                                                                                                                                                                                                                         | Page No |
|------------------------------|---------|------------------------------------------------------------------------------------------------------------------------------------------------------------------------------------------------------------------------------------------------------------------------------------------------------------------------|---------|
| <b>Title and abstract</b>    | 1       | (a) Indicate the study's design with a commonly used term in the title or the abstract<br>(b) Provide in the abstract an informative and balanced summary of what was done and what was found                                                                                                                          | 1, 2    |
| <b>Introduction</b>          |         |                                                                                                                                                                                                                                                                                                                        |         |
| Background/rationale         | 2       | Explain the scientific background and rationale for the investigation being reported                                                                                                                                                                                                                                   | 4       |
| Objectives                   | 3       | State specific objectives, including any prespecified hypotheses                                                                                                                                                                                                                                                       | 4       |
| <b>Methods</b>               |         |                                                                                                                                                                                                                                                                                                                        |         |
| Study design                 | 4       | Present key elements of study design early in the paper                                                                                                                                                                                                                                                                | 5,6     |
| Setting                      | 5       | Describe the setting, locations, and relevant dates, including periods of recruitment, exposure, follow-up, and data collection                                                                                                                                                                                        | 6,      |
| Participants                 | 6       | (a) Give the eligibility criteria, and the sources and methods of selection of participants. Describe methods of follow-up<br>(b) For matched studies, give matching criteria and number of exposed and unexposed                                                                                                      | 6       |
| Variables                    | 7       | Clearly define all outcomes, exposures, predictors, potential confounders, and effect modifiers. Give diagnostic criteria, if applicable                                                                                                                                                                               | 6, 7    |
| Data sources/<br>measurement | 8*      | For each variable of interest, give sources of data and details of methods of assessment (measurement). Describe comparability of assessment methods if there is more than one group                                                                                                                                   | 6, 7    |
| Bias                         | 9       | Describe any efforts to address potential sources of bias                                                                                                                                                                                                                                                              |         |
| Study size                   | 10      | Explain how the study size was arrived at                                                                                                                                                                                                                                                                              | 5,6,9   |
| Quantitative variables       | 11      | Explain how quantitative variables were handled in the analyses. If applicable, describe which groupings were chosen and why                                                                                                                                                                                           | 8       |
| Statistical methods          | 12      | (a) Describe all statistical methods, including those used to control for confounding<br>(b) Describe any methods used to examine subgroups and interactions<br>(c) Explain how missing data were addressed<br>(d) If applicable, explain how loss to follow-up was addressed<br>(e) Describe any sensitivity analyses | 8       |
| <b>Results</b>               |         |                                                                                                                                                                                                                                                                                                                        |         |
| Participants                 | 13*     | (a) Report numbers of individuals at each stage of study—eg numbers potentially eligible, examined for eligibility, confirmed eligible, included in the study, completing follow-up, and analysed<br>(b) Give reasons for non-participation at each stage<br>(c) Consider use of a flow diagram                        | 9       |
| Descriptive data             | 14*     | (a) Give characteristics of study participants (eg demographic, clinical, social) and information on exposures and potential confounders<br>(b) Indicate number of participants with missing data for each variable of interest<br>(c) Summarise follow-up time (eg, average and total amount)                         | 9,10    |
| Outcome data                 | 15*     | Report numbers of outcome events or summary measures over time                                                                                                                                                                                                                                                         | 9,10    |

|    |                          |                                                                                                                  |                                                                                                                                                                                                              |       |
|----|--------------------------|------------------------------------------------------------------------------------------------------------------|--------------------------------------------------------------------------------------------------------------------------------------------------------------------------------------------------------------|-------|
| 1  | Main results             | 16                                                                                                               | (a) Give unadjusted estimates and, if applicable, confounder-adjusted estimates and their precision (eg, 95% confidence interval). Make clear which confounders were adjusted for and why they were included | 9,10  |
| 2  |                          | (b) Report category boundaries when continuous variables were categorized                                        |                                                                                                                                                                                                              |       |
| 3  |                          | (c) If relevant, consider translating estimates of relative risk into absolute risk for a meaningful time period |                                                                                                                                                                                                              |       |
| 4  | Other analyses           | 17                                                                                                               | Report other analyses done—eg analyses of subgroups and interactions, and sensitivity analyses                                                                                                               | 10    |
| 5  | <b>Discussion</b>        |                                                                                                                  |                                                                                                                                                                                                              |       |
| 6  | Key results              | 18                                                                                                               | Summarise key results with reference to study objectives                                                                                                                                                     | 10,11 |
| 7  | Limitations              | 19                                                                                                               | Discuss limitations of the study, taking into account sources of potential bias or imprecision. Discuss both direction and magnitude of any potential bias                                                   | 14    |
| 8  | Interpretation           | 20                                                                                                               | Give a cautious overall interpretation of results considering objectives, limitations, multiplicity of analyses, results from similar studies, and other relevant evidence                                   | 11-14 |
| 9  | Generalisability         | 21                                                                                                               | Discuss the generalisability (external validity) of the study results                                                                                                                                        | 14    |
| 10 | <b>Other information</b> |                                                                                                                  |                                                                                                                                                                                                              |       |
| 11 | Funding                  | 22                                                                                                               | Give the source of funding and the role of the funders for the present study and, if applicable, for the original study on which the present article is based                                                | 16    |

\*Give information separately for exposed and unexposed groups.

**Note:** An Explanation and Elaboration article discusses each checklist item and gives methodological background and published examples of transparent reporting. The STROBE checklist is best used in conjunction with this article (freely available on the Web sites of PLoS Medicine at <http://www.plosmedicine.org/>, Annals of Internal Medicine at <http://www.annals.org/>, and Epidemiology at <http://www.epidem.com/>). Information on the STROBE Initiative is available at <http://www.strobe-statement.org>.

# BMJ Open

## Association between maternal infertility treatment and child neurodevelopment: findings from the Tohoku Medical Megabank Project Birth and Three-Generation Cohort Study in Miyagi and Iwate Prefectures, Japan

|                               |                                                                                                                                                                                                                                                                                                                                                                                                                                                                                                                                                                                                                                                                                                                                                                                                                                                                                                                                                                                                                                                                                                                                                                                                                                                                                                                                                                                                                                                                                                                                                                                                                                                                                                                                                                                                                                                                                                                                                                                                                                                                                                                                                      |
|-------------------------------|------------------------------------------------------------------------------------------------------------------------------------------------------------------------------------------------------------------------------------------------------------------------------------------------------------------------------------------------------------------------------------------------------------------------------------------------------------------------------------------------------------------------------------------------------------------------------------------------------------------------------------------------------------------------------------------------------------------------------------------------------------------------------------------------------------------------------------------------------------------------------------------------------------------------------------------------------------------------------------------------------------------------------------------------------------------------------------------------------------------------------------------------------------------------------------------------------------------------------------------------------------------------------------------------------------------------------------------------------------------------------------------------------------------------------------------------------------------------------------------------------------------------------------------------------------------------------------------------------------------------------------------------------------------------------------------------------------------------------------------------------------------------------------------------------------------------------------------------------------------------------------------------------------------------------------------------------------------------------------------------------------------------------------------------------------------------------------------------------------------------------------------------------|
| Journal:                      | <i>BMJ Open</i>                                                                                                                                                                                                                                                                                                                                                                                                                                                                                                                                                                                                                                                                                                                                                                                                                                                                                                                                                                                                                                                                                                                                                                                                                                                                                                                                                                                                                                                                                                                                                                                                                                                                                                                                                                                                                                                                                                                                                                                                                                                                                                                                      |
| Manuscript ID                 | bmjopen-2022-060944.R1                                                                                                                                                                                                                                                                                                                                                                                                                                                                                                                                                                                                                                                                                                                                                                                                                                                                                                                                                                                                                                                                                                                                                                                                                                                                                                                                                                                                                                                                                                                                                                                                                                                                                                                                                                                                                                                                                                                                                                                                                                                                                                                               |
| Article Type:                 | Original research                                                                                                                                                                                                                                                                                                                                                                                                                                                                                                                                                                                                                                                                                                                                                                                                                                                                                                                                                                                                                                                                                                                                                                                                                                                                                                                                                                                                                                                                                                                                                                                                                                                                                                                                                                                                                                                                                                                                                                                                                                                                                                                                    |
| Date Submitted by the Author: | 26-Apr-2022                                                                                                                                                                                                                                                                                                                                                                                                                                                                                                                                                                                                                                                                                                                                                                                                                                                                                                                                                                                                                                                                                                                                                                                                                                                                                                                                                                                                                                                                                                                                                                                                                                                                                                                                                                                                                                                                                                                                                                                                                                                                                                                                          |
| Complete List of Authors:     | <p>Noda, Aoi; Tohoku University, Tohoku Medical Megabank Organization; Tohoku University Graduate School of Medicine</p> <p>Ishikuro, Mami; Tohoku Medical Megabank Organization, Department of Preventive Medicine and Epidemiology; Tohoku University Graduate School of Medicine</p> <p>Obara, Taku; Tohoku University, Tohoku Medical Megabank Organization; Tohoku University Graduate School of Medicine</p> <p>Murakami, Keiko; Tohoku University, Tohoku Medical Megabank Organization; Tohoku University Graduate School of Medicine</p> <p>Ueno, Fumihiko; Tohoku University, Tohoku Medical Megabank Organization; Tohoku University Graduate School of Medicine</p> <p>Matsuzaki, Fumiko; Tohoku University, Tohoku Medical Megabank Organization; Tohoku University Graduate School of Medicine</p> <p>Onuma, Tomomi; Tohoku University, Tohoku Medical Megabank Organization</p> <p>Watanabe, Zen; Tohoku University Graduate School of Medicine; Tohoku University Hospital</p> <p>Shiga, Naomi; Tohoku University Graduate School of Medicine; Tohoku University Hospital</p> <p>Iwama, Noriyuki; Tohoku University Graduate School of Medicine; Tohoku University Hospital</p> <p>Hirota, Hamada; Tohoku University Graduate School of Medicine; Tohoku University Hospital</p> <p>Otsuka, Tatsui; Tohoku University Graduate School of Medicine; Tohoku University Hospital</p> <p>Tachibana, Masahito; Tohoku University Graduate School of Medicine; Tohoku University Hospital</p> <p>Tomita, Hiroaki; Tohoku University Graduate School of Medicine; Tohoku University Hospital</p> <p>Saito, Masatoshi; Tohoku University Graduate School of Medicine; Tohoku University Hospital</p> <p>Sugawara, Junichi; Tohoku Medical Megabank Organization, Tohoku University, Feto-Maternal Medical Science; Tohoku University Graduate School of Medicine, Obstetrics and Gynecology</p> <p>Kure, Shigeo; Tohoku University, Department of Pediatrics</p> <p>Yaegashi, Nobuo; Tohoku University Graduate School of Medicine; Tohoku University Hospital</p> <p>Kuriyama, Shinichi; Tohoku University Graduate School of Medicine,</p> |



1  
2  
3  
4  
5  
6  
7  
8  
9  
10  
11  
12  
13  
14  
15  
16  
17  
18  
19  
20  
21  
22  
23  
24  
25  
26  
27  
28  
29  
30  
31  
32  
33  
34  
35  
36  
37  
38  
39  
40  
41  
42  
43  
44  
45  
46  
47  
48  
49  
50  
51  
52  
53  
54  
55  
56  
57  
58  
59  
60

|                                    |                                                                                                                                       |
|------------------------------------|---------------------------------------------------------------------------------------------------------------------------------------|
|                                    | Department of Molecular Epidemiology, Environment and Genome Research Center; Tohoku University, Tohoku Medical Megabank Organization |
| <b>Primary Subject Heading</b> :   | Epidemiology                                                                                                                          |
| <b>Secondary Subject Heading</b> : | Obstetrics and gynaecology, Paediatrics                                                                                               |
| <b>Keywords</b> :                  | EPIDEMIOLOGY, Maternal medicine < OBSTETRICS, Developmental neurology & neurodisability < PAEDIATRICS                                 |
|                                    |                                                                                                                                       |

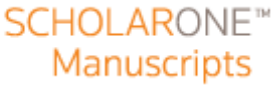



I, the Submitting Author has the right to grant and does grant on behalf of all authors of the Work (as defined in the below author licence), an exclusive licence and/or a non-exclusive licence for contributions from authors who are: i) UK Crown employees; ii) where BMJ has agreed a CC-BY licence shall apply, and/or iii) in accordance with the terms applicable for US Federal Government officers or employees acting as part of their official duties; on a worldwide, perpetual, irrevocable, royalty-free basis to BMJ Publishing Group Ltd ("BMJ") its licensees and where the relevant Journal is co-owned by BMJ to the co-owners of the Journal, to publish the Work in this journal and any other BMJ products and to exploit all rights, as set out in our [licence](#).

The Submitting Author accepts and understands that any supply made under these terms is made by BMJ to the Submitting Author unless you are acting as an employee on behalf of your employer or a postgraduate student of an affiliated institution which is paying any applicable article publishing charge ("APC") for Open Access articles. Where the Submitting Author wishes to make the Work available on an Open Access basis (and intends to pay the relevant APC), the terms of reuse of such Open Access shall be governed by a Creative Commons licence – details of these licences and which [Creative Commons](#) licence will apply to this Work are set out in our licence referred to above.

Other than as permitted in any relevant BMJ Author's Self Archiving Policies, I confirm this Work has not been accepted for publication elsewhere, is not being considered for publication elsewhere and does not duplicate material already published. I confirm all authors consent to publication of this Work and authorise the granting of this licence.

1  
2  
3  
4  
5  
6  
7  
8  
9  
10  
11  
12  
13  
14  
15  
16  
17  
18  
19  
20  
21  
22  
23  
24  
25  
26  
27  
28  
29  
30  
31  
32  
33  
34  
35  
36  
37  
38  
39  
40  
41  
42  
43  
44  
45  
46  
47  
48  
49  
50  
51  
52  
53  
54  
55  
56  
57  
58  
59  
60

# Association between maternal infertility treatment and child neurodevelopment: findings from the Tohoku Medical Megabank Project Birth and Three-Generation Cohort Study in Miyagi and Iwate Prefectures, Japan

Aoi Noda<sup>1,2,3</sup>, Mami Ishikuro<sup>1,2</sup>, Taku Obara<sup>1,2,3</sup>, Keiko Murakami<sup>1,2</sup>, Fumihiko Ueno<sup>1,2</sup>, Fumiko

Matsuzaki<sup>1,2</sup>, Tomomi Onuma<sup>1</sup>, Zen Watanabe<sup>2,3</sup>, Naomi Shiga<sup>2,3</sup>, Noriyuki Iwama<sup>1,2,3</sup>, Hamada

Hiroataka<sup>2,3</sup>, Tatsui Otsuka<sup>2,3</sup>, Masahito Tachibana<sup>2,3</sup>, Hiroaki Tomita<sup>1,2,3,4</sup>, Masatoshi Saito<sup>2,3</sup>,

Junichi Sugawara<sup>1,2,3</sup>, Shigeo Kure<sup>1,2,3</sup>, Nobuo Yaegashi<sup>1,2,3</sup>, Shinichi Kuriyama<sup>1,2,4</sup>

<sup>1</sup> Tohoku Medical Megabank Organization, Tohoku University, Sendai, Miyagi, Japan.

<sup>2</sup> Tohoku University Graduate School of Medicine, Sendai, Miyagi, Japan.

<sup>3</sup> Tohoku University Hospital, Sendai, Miyagi, Japan.

<sup>4</sup> International Research Institute of Disaster Science, Tohoku University, Sendai, Miyagi, Japan.

**Correspondence to:** Taku Obara, Division of Preventive Medicine and Epidemiology, Tohoku

Medical Megabank Organization, Tohoku University, 2-1 Seiryu-cho, Aoba-ku, Sendai 980-

8573, Japan

Tel.: +81 22 717 8104, Fax: +81 22 717 8106, Email: [obara-t@hosp.tohoku.ac.jp](mailto:obara-t@hosp.tohoku.ac.jp)

## Abstract

**Objectives:** This study aimed to examine the association between infertility treatment and neurodevelopment in children at 2 and 3.5 years of age.

**Design:** Prospective cohort study.

**Setting and participants:** The study population consisted of mother-child pairs who participated in the Tohoku Medical Megabank Project Birth and Three-Generation Cohort Study in Miyagi and Iwate Prefectures, Japan. Pregnant women were recruited in obstetric clinics or hospitals and their children were followed up by the questionnaire.

**Outcome measures:** The children's neurodevelopmental outcomes were assessed at 2 and 3.5 years of age using the Ages and Stages Questionnaire, third edition (ASQ-3), which consists of questions on five developmental domains. We performed a multivariate logistic regression analysis of the association between infertility treatment (including ovulation induction [OI], artificial insemination with husband's sperm [AIH], and assisted reproductive technology [ART]) and the clinical range of ASQ-3.

**Results:** Of 9,655 mother-child pairs, 273 (2.8%) and 487 (5.0%) were conceived through OI/AIH and ART, respectively. The odds of having developmental delays at 2 years of age were

1  
2  
3  
4  
5  
6 higher in children conceived through OI/AIH (odds ratio [OR], 1.36; 95% confidence interval  
7  
8  
9 [95% confidence interval (CI)], 1.00-1.85) and ART (OR, 1.36; 95% CI, 1.07-1.72) than in those  
10  
11  
12 conceived naturally. Additionally, OI/AIH and ART were significantly associated with  
13  
14  
15 communication (OR, 1.93; 95% CI, 1.25-2.98) and gross motor (OR, 1.50; 95% CI, 1.08-2.09)  
16  
17  
18 delays, respectively. There were no statistically significant differences in the odds of having  
19  
20  
21 developmental delays at 3.5 years of age in children conceived through OI/AIH (OR, 1.13; 95%  
22  
23  
24 CI, 0.79-1.61) and ART (OR, 1.03; 95% CI, 0.78-1.37).  
25  
26

27 **Conclusion:** In this study, we found a significant association between infertility treatment and  
28  
29 children's neurodevelopment at 2 years of age, whereas no statistically significant differences  
30  
31  
32 were found at 3.5 years of age.  
33  
34

35  
36  
37  
38  
39 **Keywords:** Ages and Stages Questionnaire, Cohort study, Infertility treatment,  
40  
41  
42 Neurodevelopment, Assisted reproductive technology.  
43  
44  
45  
46  
47

48 **Word count:** 2488  
49  
50  
51  
52  
53

## 54 **Strengths and limitations of this study**

55  
56

- 57 ● The large sample size in this study allowed us to investigate the association between each  
58  
59  
60

1  
2  
3  
4  
5  
6 type of infertility treatment and neurodevelopmental outcomes.  
7  
8

- 9
- 10 ● We evaluated children's neurodevelopment at two points—2 and 3.5 years of age.
  - 11
  - 12 ● ASQ-3 is a screening tool (not a diagnostic tool) for developmental delays.
  - 13
  - 14
  - 15 ● The number of children born through specific forms of infertility treatment, such as fresh
  - 16
  - 17 embryo transfer, was insufficient to allow sub-analysis of fresh or frozen embryo transfer.
  - 18
  - 19
  - 20
  - 21
  - 22
  - 23

## 24 Introduction

25  
26  
27 With the rapid progress in infertility treatment, the number of women who use infertility treatment  
28  
29 is increasing, and more than 10% of the childbearing population has resorted to assisted  
30  
31 reproductive technology (ART) for conception.[1] In recent years, the number of fertility  
32  
33 treatments in Japan has also been on the increase. In 2018, 56,000 new-borns were conceived  
34  
35 through ART, including in vitro fertilisation (IVF) and intracytoplasmic sperm injection (ICSI).  
36  
37 This accounts for approximately 6% of all live births in the same year.[2] Because conception  
38  
39 using ART involves several processes (such as physical manipulation of gametes and exposure  
40  
41 of embryos to hormones and culture media) that differ greatly from those in a natural  
42  
43 conception, there is potential for disturbance of normal early developmental processes.[3, 4]  
44  
45 Therefore, many studies have investigated the association between ART and  
46  
47 neurodevelopmental outcomes. [5–8]  
48  
49  
50  
51  
52  
53  
54  
55  
56  
57  
58  
59  
60

1  
2  
3  
4  
5  
6 The findings have been almost entirely consistent in showing that singleton children  
7  
8  
9 conceived through ART and born at term are no different neurodevelopmentally from those born  
10  
11  
12 following natural conception. However, the evidence remains equivocal,[8–11] and another  
13  
14  
15 review stated that possible associations between infertility treatment and developmental delay  
16  
17  
18 require further assessment in larger studies.[12] The inconsistent results in the previous studies  
19  
20  
21 may have been due to the small sample size (fewer than 1000 children),[3] and a longitudinal  
22  
23  
24 study with a larger sample size is needed.  
25

26  
27 This study aims to investigate the association between infertility treatment and  
28  
29  
30 children's neurodevelopment at 2 and 3.5 years of age in a Japanese birth cohort.  
31  
32  
33  
34  
35

## 36 **Methods**

### 37 ***Study setting and participants***

38  
39  
40 This study was based on data obtained by the Tohoku Medical Megabank Project Birth and  
41  
42  
43 Three-Generation Cohort Study (TMM BirThree Cohort Study). The TMM BirThree Cohort Study  
44  
45  
46 is a prospective cohort study based in Miyagi and Iwate Prefectures, Japan, and has been  
47  
48  
49 published elsewhere.[13, 14] Pregnant women and their family members were contacted in  
50  
51  
52  
53  
54  
55  
56  
57  
58  
59  
60  
61  
62  
63  
64  
65  
66  
67  
68  
69  
70  
71  
72  
73  
74  
75  
76  
77  
78  
79  
80  
81  
82  
83  
84  
85  
86  
87  
88  
89  
90  
91  
92  
93  
94  
95  
96  
97  
98  
99  
100  
101  
102  
103  
104  
105  
106  
107  
108  
109  
110  
111  
112  
113  
114  
115  
116  
117  
118  
119  
120  
121  
122  
123  
124  
125  
126  
127  
128  
129  
130  
131  
132  
133  
134  
135  
136  
137  
138  
139  
140  
141  
142  
143  
144  
145  
146  
147  
148  
149  
150  
151  
152  
153  
154  
155  
156  
157  
158  
159  
160  
161  
162  
163  
164  
165  
166  
167  
168  
169  
170  
171  
172  
173  
174  
175  
176  
177  
178  
179  
180  
181  
182  
183  
184  
185  
186  
187  
188  
189  
190  
191  
192  
193  
194  
195  
196  
197  
198  
199  
200  
201  
202  
203  
204  
205  
206  
207  
208  
209  
210  
211  
212  
213  
214  
215  
216  
217  
218  
219  
220  
221  
222  
223  
224  
225  
226  
227  
228  
229  
230  
231  
232  
233  
234  
235  
236  
237  
238  
239  
240  
241  
242  
243  
244  
245  
246  
247  
248  
249  
250  
251  
252  
253  
254  
255  
256  
257  
258  
259  
260  
261  
262  
263  
264  
265  
266  
267  
268  
269  
270  
271  
272  
273  
274  
275  
276  
277  
278  
279  
280  
281  
282  
283  
284  
285  
286  
287  
288  
289  
290  
291  
292  
293  
294  
295  
296  
297  
298  
299  
300  
301  
302  
303  
304  
305  
306  
307  
308  
309  
310  
311  
312  
313  
314  
315  
316  
317  
318  
319  
320  
321  
322  
323  
324  
325  
326  
327  
328  
329  
330  
331  
332  
333  
334  
335  
336  
337  
338  
339  
340  
341  
342  
343  
344  
345  
346  
347  
348  
349  
350  
351  
352  
353  
354  
355  
356  
357  
358  
359  
360  
361  
362  
363  
364  
365  
366  
367  
368  
369  
370  
371  
372  
373  
374  
375  
376  
377  
378  
379  
380  
381  
382  
383  
384  
385  
386  
387  
388  
389  
390  
391  
392  
393  
394  
395  
396  
397  
398  
399  
400  
401  
402  
403  
404  
405  
406  
407  
408  
409  
410  
411  
412  
413  
414  
415  
416  
417  
418  
419  
420  
421  
422  
423  
424  
425  
426  
427  
428  
429  
430  
431  
432  
433  
434  
435  
436  
437  
438  
439  
440  
441  
442  
443  
444  
445  
446  
447  
448  
449  
450  
451  
452  
453  
454  
455  
456  
457  
458  
459  
460  
461  
462  
463  
464  
465  
466  
467  
468  
469  
470  
471  
472  
473  
474  
475  
476  
477  
478  
479  
480  
481  
482  
483  
484  
485  
486  
487  
488  
489  
490  
491  
492  
493  
494  
495  
496  
497  
498  
499  
500  
501  
502  
503  
504  
505  
506  
507  
508  
509  
510  
511  
512  
513  
514  
515  
516  
517  
518  
519  
520  
521  
522  
523  
524  
525  
526  
527  
528  
529  
530  
531  
532  
533  
534  
535  
536  
537  
538  
539  
540  
541  
542  
543  
544  
545  
546  
547  
548  
549  
550  
551  
552  
553  
554  
555  
556  
557  
558  
559  
560  
561  
562  
563  
564  
565  
566  
567  
568  
569  
570  
571  
572  
573  
574  
575  
576  
577  
578  
579  
580  
581  
582  
583  
584  
585  
586  
587  
588  
589  
590  
591  
592  
593  
594  
595  
596  
597  
598  
599  
600  
601  
602  
603  
604  
605  
606  
607  
608  
609  
610  
611  
612  
613  
614  
615  
616  
617  
618  
619  
620  
621  
622  
623  
624  
625  
626  
627  
628  
629  
630  
631  
632  
633  
634  
635  
636  
637  
638  
639  
640  
641  
642  
643  
644  
645  
646  
647  
648  
649  
650  
651  
652  
653  
654  
655  
656  
657  
658  
659  
660  
661  
662  
663  
664  
665  
666  
667  
668  
669  
670  
671  
672  
673  
674  
675  
676  
677  
678  
679  
680  
681  
682  
683  
684  
685  
686  
687  
688  
689  
690  
691  
692  
693  
694  
695  
696  
697  
698  
699  
700  
701  
702  
703  
704  
705  
706  
707  
708  
709  
710  
711  
712  
713  
714  
715  
716  
717  
718  
719  
720  
721  
722  
723  
724  
725  
726  
727  
728  
729  
730  
731  
732  
733  
734  
735  
736  
737  
738  
739  
740  
741  
742  
743  
744  
745  
746  
747  
748  
749  
750  
751  
752  
753  
754  
755  
756  
757  
758  
759  
760  
761  
762  
763  
764  
765  
766  
767  
768  
769  
770  
771  
772  
773  
774  
775  
776  
777  
778  
779  
780  
781  
782  
783  
784  
785  
786  
787  
788  
789  
790  
791  
792  
793  
794  
795  
796  
797  
798  
799  
800  
801  
802  
803  
804  
805  
806  
807  
808  
809  
810  
811  
812  
813  
814  
815  
816  
817  
818  
819  
820  
821  
822  
823  
824  
825  
826  
827  
828  
829  
830  
831  
832  
833  
834  
835  
836  
837  
838  
839  
840  
841  
842  
843  
844  
845  
846  
847  
848  
849  
850  
851  
852  
853  
854  
855  
856  
857  
858  
859  
860  
861  
862  
863  
864  
865  
866  
867  
868  
869  
870  
871  
872  
873  
874  
875  
876  
877  
878  
879  
880  
881  
882  
883  
884  
885  
886  
887  
888  
889  
890  
891  
892  
893  
894  
895  
896  
897  
898  
899  
900  
901  
902  
903  
904  
905  
906  
907  
908  
909  
910  
911  
912  
913  
914  
915  
916  
917  
918  
919  
920  
921  
922  
923  
924  
925  
926  
927  
928  
929  
930  
931  
932  
933  
934  
935  
936  
937  
938  
939  
940  
941  
942  
943  
944  
945  
946  
947  
948  
949  
950  
951  
952  
953  
954  
955  
956  
957  
958  
959  
960  
961  
962  
963  
964  
965  
966  
967  
968  
969  
970  
971  
972  
973  
974  
975  
976  
977  
978  
979  
980  
981  
982  
983  
984  
985  
986  
987  
988  
989  
990  
991  
992  
993  
994  
995  
996  
997  
998  
999  
1000

1  
2  
3  
4  
5  
6 decline consent to participate in the research and were told that there was no disadvantage or  
7  
8  
9 risk involved with their refusal to participate. The TMM BirThree Cohort Study protocol was  
10  
11  
12 approved by the Tohoku University Tohoku Medical Megabank Organization's internal review  
13  
14  
15 board (2013-1-103-1).  
16  
17  
18  
19  
20

### 21 ***Infertility treatments***

22  
23  
24 We extracted infertility treatment types from maternal medical records, and they included  
25  
26  
27 ovulation induction (OI), artificial insemination (AIH), IVF, and ICSI; we refer to IVF and ICSI as  
28  
29  
30 ART in this study.  
31  
32  
33  
34  
35

### 36 ***Neurodevelopmental assessments***

37  
38  
39 The third edition of the Ages and Stages Questionnaire (ASQ-3) was used to evaluate child  
40  
41  
42 neurodevelopment.[15, 16] ASQ-3 is a comprehensive, reliable screening questionnaire that  
43  
44  
45 can be used for children aged 1 and 66 months. The guardians of children aged 2 and 3.5 years  
46  
47  
48 filled in the questionnaire. Each questionnaire contains 30 questions divided into five  
49  
50  
51 developmental domains: "communication", "fine motor", "gross motor", "problem solving", and  
52  
53  
54 "personal-social". Each domain has a set of six items, and each item is given a score of 10, 5,  
55  
56  
57 and 0 corresponding to "yes", "sometimes", and "not yet", respectively. The total score ranges  
58  
59  
60



1  
2  
3  
4  
5  
6 from 0 to 60 for each domain. We defined “developmental delay” in a domain as when the score  
7  
8  
9 was greater than two standard deviations (SD) below the mean in that domain.[17] In this study,  
10  
11  
12 we used the validated Japanese translation of ASQ-3.[16]  
13  
14  
15  
16  
17

## 18 **Covariates**

19  
20  
21 Considering previous studies and the characteristics of the population in this study, we included  
22  
23  
24 maternal age at delivery, parity, preterm birth (PTB), child sex, birth defects, multiple births,  
25  
26  
27 maternal education, and household income as covariates of developmental outcomes.[7, 18]  
28  
29

30 Maternal age, gestational weeks, parity, child sex, birth defect, and multiple birth were obtained  
31  
32  
33 from medical records. Birth defects were defined in this study as follow; anencephaly,  
34  
35  
36 microcephaly, hydrocephalus, craniotabes, holoprosencephaly, agenesis of the corpus  
37  
38  
39 callosum, other head or brain abnormalities, omphalocele, abdominal fissure, epidermolysis  
40  
41  
42 bullosa hereditarian, incontinentia pigmenti, myelomeningocele, Down's syndrome, trisomy 18,  
43  
44  
45 trisomy 13, achondroplasia, osteogenesis imperfecta, arthrogryposis multiplex congenita, other  
46  
47  
48 skeletal or muscle abnormalities, amniotic band syndrome, and other chromosomal abnormality.  
49

50  
51 Data on maternal level of education and household income were obtained using a self-report  
52  
53  
54 questionnaire.  
55  
56  
57  
58  
59  
60

## ***Statistical analysis***

Characteristics of mothers and children were compared in three groups: natural conception, OI/AIH, and ART. Continuous and categorical variables were described as mean (SD) and frequency or proportion, respectively. Differences in prevalence were analysed using the chi-square test. Logistic regression analyses were performed to determine the associations between infertility treatment and each of the five domains of ASQ-3 at 2 and 3.5 years of age after adjusting for possible confounding factors. Odds ratios (ORs) and confidence intervals (CIs) were calculated. Children who were conceived naturally were used as the reference group in all analyses. For subgroup analyses, participants were classified into five groups as follows: natural conception, OI, AIH, IVF, and ICSI. Furthermore, we compared developmental outcomes among children born following natural conception, fresh embryo transfer (ET), and frozen-thawed ET. Statistical significance was set at  $p < 0.05$ . All statistical analyses were performed using SAS version 9.4 (SAS Institute, Inc., Cary, NC, USA).

## ***Patient and public involvement***

No participants were involved in this study because we used an existing dataset for the analysis.

## Results

### *Characteristics of the participants*

We analysed data from 9,655 eligible mother-child pairs who filled in ASQ-3 questionnaires (Figure 1). Of the 9,655 mother-child pairs, 273 (2.8%) were conceived through OI/AIH and 487 (5.0%) through ART. Maternal and child characteristics are shown in Table 1. Mothers who were exposed to infertility treatment were older and had higher levels of educational and household income. Children who were conceived following infertility treatment were likely to have a lower birth weight (LBW) and gestational age.

### *Infertility treatment and children's neurodevelopment at 2 years of age*

In total, 1,437 children (14.9%) had developmental delay at 2 years of age when screened using the ASQ-3. The proportion of children with developmental delays at 2 years of age was 14.3%, 21.3%, and 22.5% for natural conception, OI/AIH, and ART, respectively. In the multivariable models, the odds of having developmental delays at 2 years of age were higher in children conceived through OI/AIH (OR, 1.36; 95% CI, 1.00-1.85) and ART (OR, 1.36; 95% CI, 1.07-1.72) than in those conceived naturally. OI/AIH and ART were significantly associated with communication (OR, 1.93; 95% CI, 1.25-2.98), and gross motor (OR, 1.50; 95% CI, 1.08-2.09) delays, respectively (Table 2).

### ***Infertility treatment and children's neurodevelopment at 3.5 years of age***

In total, 1,257 children (13.0%) had developmental delay at 3.5 years of age when screened using the ASQ-3. The proportion of children with developmental delay at 3.5 years of age was 12.9%, 14.7%, and 13.8% for natural conception, OI/AIH, and ART, respectively. In the multivariable models, the odds of having developmental delays at 3.5 years of age were higher in children conceived through OI/AIH (OR, 1.13; 95% CI, 0.79-1.61) and ART (OR, 1.03; 95% CI, 0.78-1.37) than in those conceived naturally. Moreover, children conceived through infertility treatment had no statistically significant differences in any domains at 3.5 years of age (Table 2).

Subgroups based on the 5 domains and embryo types were analysed and the results are shown in supplementary tables S1 to S4. Although the number of children conceived through each infertility treatment was less, the results, when compared within the five groups or types of ET, were similar to those within the three groups.

## **Discussion**

We investigated the association between infertility treatment and children's neurodevelopment, among 9,655 mother-child pairs. In multivariable models, a significant association between

1  
2  
3  
4  
5  
6 infertility treatment and neurodevelopment was observed among the children conceived through  
7  
8  
9 infertility treatment, at 2 years of age; no statistically significant differences were found in them  
10  
11  
12 at 3.5 years of age.  
13  
14

15 Children conceived through ART are known to be at risk of LBW, PTB, and birth  
16  
17 defects,[19] which are risk factors for neurodevelopmental disorders.[20, 21] However, the data  
18  
19 from previous studies among children aged 1–5 years suggest that there are no developmental  
20  
21 differences between children conceived through ART and those conceived naturally, after  
22  
23 adjusting for confounding variables.[3, 19, 22] Even when children with congenital anomalies or  
24  
25 genetic syndromes and multiple births (which are known to affect development) were excluded  
26  
27 from the study (n = 9,271), a significant association between infertility treatment and children's  
28  
29 neurodevelopment was seen at 2 years of age, while no statistically significant differences were  
30  
31 found at 3.5 years of age (Table S5). Furthermore, we took into account very preterm (< 34  
32  
33 weeks) or extremely preterm (< 29 weeks) birth for adjusting the results for important risk  
34  
35 factors and the similar result was obtained (Table S6). We also performed analysis adjusted for  
36  
37 birth weight and the similar result was obtained (Table S7). A systematic review of  
38  
39 neurodevelopmental disorders,[5] neuromotor, cognitive, language, and behavioural outcomes  
40  
41 of children born after ART showed that ART had no significant effect on children's neuromotor  
42  
43 and cognitive development.[6] A previous study showed no significant difference in the  
44  
45  
46  
47  
48  
49  
50  
51  
52  
53  
54  
55  
56  
57  
58  
59  
60

1  
2  
3  
4  
5  
6 neurodevelopmental scores between children conceived through ART and those conceived  
7  
8  
9 naturally; however, it showed a decrease in the score units of each scale among children  
10  
11  
12 conceived through ART.[23] The reason for the discrepancy in results at 2 years of age  
13  
14  
15 between our study and the previous study might be the proportion of children conceived through  
16  
17  
18 infertility treatment. Because infertility treatment has become widespread owing to technological  
19  
20  
21 advancement, the proportion of children conceived through infertility treatment was higher in our  
22  
23  
24 study than in previous studies.[24–26] Therefore, statistical differences might be detectable in  
25  
26  
27 our study. In addition, frozen-thawed embryos have been used for most ARTs in Japan.[27]  
28  
29  
30 Frozen-thawed ET is associated with a significantly lower incidence of PTB and LBW, which are  
31  
32  
33 risk factors for neurodevelopmental disorders.[28] Among children with developmental delay at  
34  
35  
36 2 years of age, the proportion with developmental delay at 3.5 years of age was 47.3%,46.6%,  
37  
38  
39 and 38.5% for natural conception, OI/AIH, and ART, respectively. The proportion of children  
40  
41  
42 with developmental delay at 3.5 years of age was low, especially in those conceived through  
43  
44  
45 ART. Our longitudinal study demonstrated that at 2 and 3.5 years of age, the  
46  
47  
48 neurodevelopmental status of children conceived through infertility treatment, especially ART,  
49  
50  
51 might eventually catch up with that of those conceived naturally. In Japan, the health check-up  
52  
53  
54 for children is done at 1.5 years of age, so the counsel provided by doctors and public health  
55  
56  
57 nurses, which is tailored towards individual development, might also help promote the children's  
58  
59  
60

1  
2  
3  
4  
5  
6 development. A previous study in Japan stated that the developmental state of a child needs to  
7  
8  
9 be understood not only based on the characteristics of the child at one point but also on the  
10  
11  
12 progress of the child's development from the results of the health check-up at 1.5 years of age.  
13  
14  
15 In fact, it has been suggested that it is important to conduct a follow-up health check-up at 3  
16  
17  
18 years of age in relation to the development at the previous age.[29]  
19  
20

21           Developmental delay in the communication domain was seen at age 2 years in  
22  
23 children conceived through OI/AIH but not in those conceived through ART. A previous study  
24  
25 showed that compared with children conceived naturally, those conceived through OI had lower  
26  
27 verbal ability at 3 years of age, while those conceived through ART had higher verbal ability;  
28  
29 children conceived through infertility treatment had higher verbal ability at 5 years of age than  
30  
31 those conceived naturally.[30] A previous hospital-based cohort study in Japan showed that  
32  
33 children conceived through ART had significantly better language development than those  
34  
35 conceived naturally.[7] Although direct comparisons with other studies assessing  
36  
37 neurodevelopment in children conceived through infertility treatment are difficult because each  
38  
39 researcher uses various assessment tools and control groups, the children conceived through  
40  
41 ART might have higher verbal ability or better language development than those conceived  
42  
43 through OI/AIH or naturally. Children conceived through infertility treatments generally enjoy  
44  
45 advantageous socioeconomic benefits. It is possible that parents who utilise ART to conceive  
46  
47  
48  
49  
50  
51  
52  
53  
54  
55  
56  
57  
58  
59  
60

1  
2  
3  
4  
5  
6 may invest more into rearing the children, which might have the greatest impact on language  
7  
8  
9 skills.[7, 30, 31]  
10

11  
12 Furthermore, ART was associated with developmental delays in the gross motor  
13  
14 domain at 2 years of age. This association was not seen at 3.5 years of age. A hospital-based  
15  
16 cohort study in Japan reported no significant difference in gross motor function (evaluated using  
17  
18 the Ability for Basic Movement Scale for Children) at 12 months of age between the ART and  
19  
20 control groups.[32] In contrast, the Danish National Birth Cohort study showed that infertility  
21  
22 treatment, especially ICSI, may be associated with a slight delay in gross motor development at  
23  
24 1.5 years of age.[8] However, another study suggested no differences in motor development at  
25  
26 5 years of age among children conceived through ICSI, IVF, and natural conception.[33] These  
27  
28 findings suggest that infertility treatment might be associated with children's development in the  
29  
30 early stage, but the neurodevelopment of children conceived through infertility treatment might  
31  
32 catch up with that of those conceived naturally.  
33  
34  
35  
36  
37  
38  
39  
40  
41  
42  
43  
44

45 This study had some limitations. The ASQ-3 is a screening tool (not a diagnostic tool)  
46  
47 for developmental delays; however, it is considered to be highly reliable because it has been  
48  
49 validated in many countries worldwide and has been used in a variety of studies.[18, 34, 35]  
50  
51  
52 Since we focused on children who filled in both questionnaires (at 2 and 3.5 years of age), there  
53  
54  
55 was the concern of bias due to the reduced number of participants and the deterioration of  
56  
57  
58  
59  
60



1  
2  
3  
4  
5  
6 statistical power in the analysis. However, among the children who did not fill in the  
7  
8  
9 questionnaire at 3.5 years of age, the percentage of those who had neurodevelopmental delay  
10  
11  
12 at 2 years of age was 14.5%, 10.8%, and 15.0% for natural conception, OI/AIH, and ART,  
13  
14  
15 respectively. Therefore, there was no bias such as more children with neurodevelopmental  
16  
17  
18 delay at 2 years of age among children who did not answer the questionnaire at 3.5 years old  
19  
20  
21 and the potential applicability of our results to national populations can be discussed. In the  
22  
23  
24 subgroup analysis with detailed classification, the number of children conceived through specific  
25  
26  
27 forms of infertility treatment, such as fresh ET, was insufficient to compare the ET types. Male  
28  
29  
30 infertility or the time to pregnancy should be taken into account when evaluating subfertility  
31  
32  
33 patients. [36] However, it was difficult to include these factors because we did not collect them  
34  
35  
36 in this study. Research in this field is complex because of the need to collect various data to  
37  
38  
39 determine the effects of infertility treatment on offspring outcomes. As this was an observational  
40  
41  
42 study, residual confounding might have occurred. However, this study was a large longitudinal  
43  
44  
45 birth cohort with detailed information from the participants, and although continued follow-up of  
46  
47  
48 children born after infertility treatment is needed, this study helps to increase the understanding  
49  
50  
51 of the association between infertility treatment and neurodevelopmental outcomes in Japanese  
52  
53  
54 children.  
55  
56  
57  
58  
59  
60

## Conclusion

In this study, we found a significant association between infertility treatment and neurodevelopment among children who were conceived through infertility treatments and those conceived naturally, at 2 years of age; however, no statistically significant differences were found at 3.5 years of age.

## Acknowledgments

We are sincerely grateful to all participants of the TMM BirThree Cohort Study and the staff members of the Tohoku Medical Megabank Organization, Tohoku University. A full list of members is available at <https://www.megabank.tohoku.ac.jp/english/a210901/>.

**Contributors:** AN, MI, and T.Obara designed the study. AN, MI, T.Obara, KM, FU, FM, T.Onuma, ZW, NS, NI, HH, MT, MS, JS, S.Kure, NY, and S.Kuriyama contributed to data collection. AN, MI and TO contributed to data analysis and interpretation. AN, MI, T.Obara, KM, FU, FM, T.Onuma, ZW, NS, NI, HH, T. Otsuka, MT, HT, MS, JS, S.Kure, NY, and S.Kuriyama provided advice regarding critically important intellectual content and helped to draft the manuscript.

**Funding:** The TMM BirThree Cohort Study was supported by the Japan Agency for Medical

1  
2  
3  
4  
5  
6 Research and Development (AMED), Japan [grant number, JP21km0105001, JP21tm0124005].  
7  
8

9 Funding sources had no role in the study design, collection, analysis, or interpretation of the data,  
10  
11  
12 writing of the manuscript, or decision to submit the paper for publication.  
13  
14  
15  
16  
17

18 **Competing interests:** None declared.  
19  
20  
21  
22  
23

24 **Provenance and peer review:** Not commissioned; externally peer reviewed.  
25  
26  
27  
28  
29

30 **Data availability statement:** The data obtained through the TMM BirThree Cohort Study are  
31  
32  
33 incorporated into the TMM biobank. All data analyzed during the present study are available for  
34  
35  
36 research purpose with the approval by the Sample and Data Access Committee of the Biobank.  
37  
38  
39  
40  
41

## 42 **References**

43  
44

- 45 1 Frederiksen Y, Farver-Vestergaard I, Skovgård NG, et al. Efficacy of psychosocial  
46  
47 interventions for psychological and pregnancy outcomes in infertile women and men: a  
48  
49 systematic review and meta-analysis. *BMJ Open* 2015;5:e006592.  
50  
51
- 52 2 Japan society of obstetrics and gynecology (in Japanese). [https://plaza.umin.ac.jp/~jsog-](https://plaza.umin.ac.jp/~jsog-art/2018data_20201001.pdf)  
53  
54  
55  
56  
57  
58  
59  
60 art/2018data\_20201001.pdf (Accessed 31 Dec 2021).

- 1  
2  
3  
4  
5  
6  
7  
8  
9  
10  
11  
12  
13  
14  
15  
16  
17  
18  
19  
20  
21  
22  
23  
24  
25  
26  
27  
28  
29  
30  
31  
32  
33  
34  
35  
36  
37  
38  
39  
40  
41  
42  
43  
44  
45  
46  
47  
48  
49  
50  
51  
52  
53  
54  
55  
56  
57  
58  
59  
60
- 3 Wilson CL, Fisher JR, Hammarberg K, et al. Looking downstream: a review of the literature on physical and psychosocial health outcomes in adolescents and young adults who were conceived by ART. *Hum Reprod* 2011;26:1209–19.
  - 4 Sullivan-Pyke CS, Senapati S, Mainigi MA, et al. In vitro fertilization and adverse obstetric and perinatal outcomes. *Semin Perinatol* 2017;41:345–53.
  - 5 Djuwantono T, Aviani JK, Permadi W, et al. Risk of neurodevelopmental disorders in children born from different ART treatments: a systematic review and meta-analysis. *J Neurodev Disord* 2020;12:33.
  - 6 Middelburg KJ, Heineman MJ, Bos AF, et al. Neuromotor, cognitive, language and behavioural outcome in children born following IVF or ICSI-a systematic review. *Hum Reprod Update* 2008;14:219–31.
  - 7 Aoki S, Hashimoto K, Ogawa K, et al. Developmental outcomes of Japanese children born through assisted reproductive technology (ART) in toddlerhood. *J Obstet Gynaecol Res* 2018;44:929–35.
  - 8 Zhu JL, Basso O, Obel C, et al. Infertility, infertility treatment and psychomotor development: the Danish National Birth Cohort. *Paediatr Perinat Epidemiol* 2009;23:98–106.
  - 9 Catford SR, McLachlan RI, O'Bryan MK, et al. Long-term follow-up of intra-cytoplasmic

- 1  
2  
3  
4  
5  
6 sperm injection-conceived offspring compared with in vitro fertilization-conceived offspring:  
7  
8  
9 a systematic review of health outcomes beyond the neonatal period. *Andrology*  
10  
11  
12 2017;5:610–21.  
13  
14
- 15 10 Punamäki RL, Tiitinen A, Lindblom J, et al. Mental health and developmental outcomes for  
16  
17 children born after ART: a comparative prospective study on child gender and treatment  
18  
19 type. *Hum Reprod* 2016;31:100–7.  
20  
21  
22
- 23 11 Sutcliffe AG, Ludwig M. Outcome of assisted reproduction. *Lancet* 2007;370:351–9.  
24  
25  
26
- 27 12 Hvidtjørn D, Schieve L, Schendel D, et al. Cerebral palsy, autism spectrum disorders, and  
28  
29 developmental delay in children born after assisted conception: a systematic review and  
30  
31 meta-analysis. *Arch Pediatr Adolesc Med* 2009;163:72–83.  
32  
33  
34
- 35 13 Kuriyama S, Metoki H, Kikuya M, et al. Cohort profile: Tohoku Medical Megabank Project  
36  
37 Birth and three-Generation Cohort Study (TMM BirThree Cohort Study): rationale, progress  
38  
39 and perspective. *Int J Epidemiol* 2020;49:18–19.  
40  
41  
42  
43
- 44 14 Ishikuro M, Obara T, Osanai T, et al. Strategic methods for recruiting grandparents: the  
45  
46 Tohoku medical Megabank birth and three-generation cohort study. *Tohoku J Exp Med*  
47  
48 2018;246:97–105.  
49  
50  
51  
52
- 53 15 Singh A, Yeh CJ, Blanchard SB. Ages and Stages Questionnaire: a global screening scale.  
54  
55  
56  
57 *Bol Med Hosp Infant Mex* 2017;74:5–12.  
58  
59  
60

- 1  
2  
3  
4  
5  
6  
7  
8  
9  
10  
11  
12  
13  
14  
15  
16  
17  
18  
19  
20  
21  
22  
23  
24  
25  
26  
27  
28  
29  
30  
31  
32  
33  
34  
35  
36  
37  
38  
39  
40  
41  
42  
43  
44  
45  
46  
47  
48  
49  
50  
51  
52  
53  
54  
55  
56  
57  
58  
59  
60
- 16 Mezawa H, Aoki S, Nakayama SF, et al. Psychometric profile of the Ages and Stages Questionnaires, Japanese translation. *Pediatr Int* 2019;61:1086–95.
- 17 Squires J, Twombly E, Bricker D, et al. *B. As Q®-3 User's Guide*. 3rd ed. Baltimore, MD: Brookes 2009.
- 18 Yeung EH, Sundaram R, Bell EM, et al. Examining infertility treatment and early childhood development in the upstate KIDS study. *JAMA Pediatr* 2016;170:251–8.
- 19 Vuong LN, Ly TT, Nguyen NA, et al. Development of children born from freeze-only versus fresh embryo transfer: follow-up of a randomized controlled trial. *Fertil Steril* 2020;114:558–66.
- 20 Helmerhorst FM, Perquin DA, Donker D, et al. Perinatal outcome of singletons and twins after assisted conception: a systematic review of controlled studies. *BMJ* 2004;328:261.
- 21 Jackson RA, Gibson KA, Wu YW, et al. Perinatal outcomes in singletons following in vitro fertilization: a meta-analysis. *Obstet Gynecol* 2004;103:551–63.
- 22 Basatemur E, Sutcliffe A. Placenta. *Follow-Up Child Born After Art* 2008;29:135–40.
- 23 Balayla J, Sheehy O, Fraser WD, et al. Neurodevelopmental outcomes after assisted reproductive technologies. *Obstet Gynecol* 2017;129:265–72.
- 24 Dyer S, Chambers GM, de Mouzon J, et al. International Committee for Monitoring Assisted Reproductive Technologies world report: assisted Reproductive technology 2008,

- 1  
2  
3  
4  
5  
6 2009, and 2010. *Hum Reprod* 2016;31:1588–609.
- 7  
8  
9 25 de Mouzon J, Chambers GM, Zegers-Hochschild F, et al. International Committee for  
10  
11  
12 Monitoring Assisted Reproductive Technologies world report: assisted reproductive  
13  
14  
15 technology 2012. *Hum Reprod* 2020;35:1900–13.
- 16  
17  
18 26 Adamson GD, de Mouzon J, Chambers G, et al. International Committee for Monitoring  
19  
20  
21 Assisted Reproductive Technology. World report on assisted reproductive technology.  
22  
23  
24 *ICMART World Collab Rep Assist Reprod Technol (Art)*.  
25  
26  
27 <https://seureservercdn.net/198.71.233.206/3nz.654.myftpupload.com/wp->  
28  
29  
30 content/uploads/ICMART-ESHRE-WR2017-Preliminary.pdf (Accessed 31 Dec 2021) 2017.
- 31  
32  
33 27 Ishihara O, Jwa SC, Kuwahara A, et al. Assisted reproductive technology in Japan: A  
34  
35  
36 summary report for 2017 by the Ethics Committee of the Japan Society of Obstetrics and  
37  
38  
39 Gynecology. *Reprod Med Biol* 2019;19:3–12.
- 40  
41  
42 28 Ishihara O, Araki R, Kuwahara A, et al. Impact of frozen–thawed single-blastocyst transfer  
43  
44  
45 on maternal and neonatal outcome: an analysis of 277,042 single-embryo transfer cycles  
46  
47  
48 from 2008 to 2010 in Japan. *Fertil Steril* 2014;101:128–33.
- 49  
50  
51 29 Hongo K, Yagi S, Kono A. The Research on Follow-up Children’s Feature in Health  
52  
53  
54 Checkup for 3-year-old Children (in Japanese). *Pediatr Health Res* 2006;65:806–13.
- 55  
56  
57 30 Carson C, Kelly Y, Kurinczuk JJ, et al. Effect of pregnancy planning and fertility treatment  
58  
59  
60

- 1  
2  
3  
4  
5  
6 on cognitive outcomes in children at ages 3 and 5: longitudinal cohort study. *BMJ*  
7  
8  
9 2011;343:d4473.  
10  
11  
12 31 Lugo-Gil J, Tamis-LeMonda CS. Family resources and parenting quality: links to children's  
13  
14 cognitive development across the first 3 years. *Child Dev* 2008;79:1065–85.  
15  
16  
17 32 Hashimoto K, Ogawa K, Horikawa R, et al. Gross motor function and general development  
18  
19 of babies born after assisted reproductive technology. *J Obstet Gynaecol Res*  
20  
21  
22 2016;42:266–72.  
23  
24  
25  
26  
27 33 Ponjaert-Kristoffersen I, Bonduelle M, Barnes J, et al. International collaborative study of  
28  
29 intracytoplasmic sperm injection-conceived, in vitro fertilization-conceived, and naturally  
30  
31 conceived 5-year-old child outcomes: cognitive and motor assessments. *Pediatrics*  
32  
33  
34 2005;115:e283–9.  
35  
36  
37  
38  
39 34 Chong KC, Zhou VL, Tarazona D, et al. ASQ-3 scores are sensitive to small differences in  
40  
41 age in a Peruvian infant population. *Child Care Health Dev* 2017;43:556–65.  
42  
43  
44  
45 35 Agarwal PK, Xie H, Sathyapalan Rema AS, et al. Evaluation of the Ages and Stages  
46  
47 Questionnaire (ASQ 3) as a developmental screener at 9, 18, and 24 months. *Early Hum*  
48  
49  
50  
51  
52 *Dev* 2020;147:105081.  
53  
54  
55 36 Esteves SC, Roque M, Bedoschi G, et al. Intracytoplasmic sperm injection for male  
56  
57 infertility and consequences for offspring. *Nat Rev Urol*. 2018;15(9):535-562.  
58  
59  
60



1  
2  
3  
4  
5  
6  
7  
8  
9 **Figure Legend**  
10

11  
12 **Figure 1. Flow chart of the exclusion criteria in the TMM BirThree Cohort Study**  
13

14  
15 This flow chart describes the exclusion criteria and the number of total participants, excluded  
16  
17  
18 participants, and eligible participants. ASQ-3, Ages & Stages Questionnaires, Third Edition.  
19  
20  
21  
22  
23  
24  
25  
26  
27  
28  
29  
30  
31  
32  
33  
34  
35  
36  
37  
38  
39  
40  
41  
42  
43  
44  
45  
46  
47  
48  
49  
50  
51  
52  
53  
54  
55  
56  
57  
58  
59  
60

For peer review only

**Table 1. Characteristics of the study population**

|                                             | Total   |      | Infertility treatment |      |        |      |       |      | p       |
|---------------------------------------------|---------|------|-----------------------|------|--------|------|-------|------|---------|
|                                             |         |      | Natural conception    |      | OI/AIH |      | ART   |      |         |
|                                             | n=9,655 | %    | n=8,895               | %    | n=273  | %    | n=487 | %    |         |
| <b>Mother's age, mean (SD), y</b>           | 32.7    | 4.7  | 32.4                  | 4.6  | 34.3   | 3.9  | 37.2  | 3.8  | <0.0001 |
| <b>Pre-pregnancy BMI (kg/m<sup>2</sup>)</b> |         |      |                       |      |        |      |       |      |         |
| < 18.5                                      | 1,365   | 14.1 | 1,279                 | 14.4 | 36     | 13.2 | 50    | 10.3 | 0.0707  |
| 18.5 to < 25.0                              | 7,204   | 74.6 | 6,636                 | 74.6 | 196    | 72.1 | 372   | 76.3 |         |
| ≥ 25.0                                      | 1,083   | 11.2 | 977                   | 11.0 | 41     | 15.0 | 65    | 13.4 |         |
| <b>Educational level</b>                    |         |      |                       |      |        |      |       |      |         |
| High school graduate or less                | 2,711   | 28.1 | 2,565                 | 28.8 | 49     | 18.0 | 97    | 19.9 | <0.0001 |
| Junior or vocational college graduate       | 3,513   | 36.4 | 3,215                 | 36.1 | 100    | 36.6 | 198   | 40.7 |         |
| University graduate or above                | 2,722   | 28.2 | 2,457                 | 27.6 | 102    | 37.4 | 163   | 33.5 |         |
| <b>Household income (JPY/year)</b>          |         |      |                       |      |        |      |       |      |         |
| < 4,000,000                                 | 3,117   | 32.3 | 2,974                 | 33.4 | 63     | 23.1 | 80    | 16.4 | <0.0001 |
| 4,000,000 to < 6,000,000                    | 3,063   | 31.7 | 2,810                 | 31.6 | 86     | 31.5 | 167   | 34.3 |         |
| ≥ 6,000,000                                 | 2,992   | 31.0 | 2,658                 | 29.9 | 111    | 40.7 | 223   | 45.8 |         |
| <b>Cigarette smoking</b>                    |         |      |                       |      |        |      |       |      |         |
| Never                                       | 6,194   | 64.6 | 5,675                 | 64.3 | 195    | 71.4 | 324   | 66.7 | <0.0001 |
| Stopped before pregnancy                    | 2,291   | 23.9 | 2,075                 | 23.5 | 60     | 22.0 | 156   | 32.1 |         |
| Stopped after pregnancy                     | 950     | 9.9  | 928                   | 10.5 | 17     | 6.2  | 5     | 1.0  |         |
| Smoked during early pregnancy               | 152     | 1.6  | 150                   | 1.7  | 1      | 0.4  | 1     | 0.2  |         |
| <b>Alcohol consumption</b>                  |         |      |                       |      |        |      |       |      |         |
| Drinking at early pregnancy                 | 1,917   | 20.0 | 1,766                 | 20.0 | 57     | 21.0 | 94    | 19.3 | 0.5426  |

|    |  |                                      |       |      |       |      |     |      |     |      |
|----|--|--------------------------------------|-------|------|-------|------|-----|------|-----|------|
| 1  |  |                                      |       |      |       |      |     |      |     |      |
| 2  |  |                                      |       |      |       |      |     |      |     |      |
| 3  |  | Former                               | 3,273 | 34.1 | 3,023 | 34.2 | 93  | 34.2 | 157 | 32.3 |
| 4  |  | Never                                | 3,871 | 40.3 | 3,568 | 40.4 | 105 | 38.6 | 198 | 40.7 |
| 5  |  | Cannot drink because of constitution | 536   | 5.6  | 482   | 5.5  | 17  | 6.3  | 37  | 7.6  |
| 6  |  |                                      |       |      |       |      |     |      |     |      |
| 7  |  |                                      |       |      |       |      |     |      |     |      |
| 8  |  | <b>Parity</b>                        |       |      |       |      |     |      |     |      |
| 9  |  | Nullipara                            | 4,564 | 47.3 | 4,024 | 45.2 | 202 | 74.0 | 338 | 69.4 |
| 10 |  | Multipara                            | 5,091 | 52.7 | 4,871 | 54.8 | 71  | 26.0 | 149 | 30.6 |
| 11 |  |                                      |       |      |       |      |     |      |     |      |
| 12 |  | <b>Child's sex</b>                   |       |      |       |      |     |      |     |      |
| 13 |  | Male                                 | 4,958 | 51.4 | 4,581 | 51.5 | 137 | 50.2 | 240 | 49.3 |
| 14 |  | Female                               | 4,697 | 48.7 | 4,314 | 48.5 | 136 | 49.8 | 247 | 50.7 |
| 15 |  |                                      |       |      |       |      |     |      |     |      |
| 16 |  |                                      |       |      |       |      |     |      |     |      |
| 17 |  | <b>Gestational age (weeks)</b>       |       |      |       |      |     |      |     |      |
| 18 |  | ≥37                                  | 9,017 | 93.4 | 8,338 | 93.7 | 245 | 89.7 | 434 | 89.1 |
| 19 |  | 34 to < 37                           | 482   | 5.0  | 417   | 4.7  | 26  | 9.5  | 39  | 8.0  |
| 20 |  | 29 to < 34                           | 113   | 1.2  | 98    | 1.1  | 2   | 0.7  | 13  | 2.7  |
| 21 |  | < 29                                 | 33    | 0.3  | 32    | 0.4  | 0   | 0.0  | 1   | 0.2  |
| 22 |  |                                      |       |      |       |      |     |      |     |      |
| 23 |  |                                      |       |      |       |      |     |      |     |      |
| 24 |  | <b>Birth weight (g)</b>              |       |      |       |      |     |      |     |      |
| 25 |  | ≥2,500                               | 8,689 | 90.0 | 8,037 | 90.4 | 229 | 83.9 | 423 | 86.9 |
| 26 |  | < 2,500                              | 952   | 9.9  | 844   | 9.5  | 44  | 16.1 | 64  | 13.1 |
| 27 |  |                                      |       |      |       |      |     |      |     |      |
| 28 |  |                                      |       |      |       |      |     |      |     |      |
| 29 |  | <b>Birth defect</b>                  |       |      |       |      |     |      |     |      |
| 30 |  | No                                   | 9,477 | 98.3 | 8,740 | 98.4 | 269 | 98.5 | 468 | 96.1 |
| 31 |  | Yes                                  | 169   | 1.8  | 146   | 1.6  | 4   | 1.5  | 19  | 3.9  |
| 32 |  |                                      |       |      |       |      |     |      |     |      |
| 33 |  | <b>Multiple birth</b>                |       |      |       |      |     |      |     |      |
| 34 |  | No                                   | 9,440 | 97.8 | 8,746 | 98.3 | 244 | 89.4 | 450 | 92.4 |
| 35 |  | Yes                                  | 215   | 2.2  | 149   | 1.7  | 29  | 10.6 | 37  | 7.6  |
| 36 |  |                                      |       |      |       |      |     |      |     |      |
| 37 |  |                                      |       |      |       |      |     |      |     |      |
| 38 |  |                                      |       |      |       |      |     |      |     |      |
| 39 |  |                                      |       |      |       |      |     |      |     |      |
| 40 |  |                                      |       |      |       |      |     |      |     |      |
| 41 |  |                                      |       |      |       |      |     |      |     |      |
| 42 |  |                                      |       |      |       |      |     |      |     |      |
| 43 |  |                                      |       |      |       |      |     |      |     |      |
| 44 |  |                                      |       |      |       |      |     |      |     |      |
| 45 |  |                                      |       |      |       |      |     |      |     |      |
| 46 |  |                                      |       |      |       |      |     |      |     |      |

**ASQ-3 (2Y)**

|             |       |      |       |      |     |      |     |      |         |
|-------------|-------|------|-------|------|-----|------|-----|------|---------|
| > Mean -2SD | 8,218 | 85.1 | 7,626 | 85.7 | 215 | 78.8 | 377 | 77.4 | <0.0001 |
| ≤ Mean -2SD | 1,437 | 14.9 | 1,269 | 14.3 | 58  | 21.3 | 110 | 22.6 |         |

**ASQ-3 (3.5Y)**

|             |       |      |       |      |     |      |     |      |        |
|-------------|-------|------|-------|------|-----|------|-----|------|--------|
| > Mean -2SD | 8,398 | 87.0 | 7,746 | 87.1 | 233 | 85.4 | 419 | 86.0 | 0.5749 |
| ≤ Mean -2SD | 1,257 | 13.0 | 1,149 | 12.9 | 40  | 14.7 | 68  | 14.0 |        |

**Father's age, mean (SD), y**

|         |         |       |       |         |
|---------|---------|-------|-------|---------|
| n=4,183 | n=3,784 | n=142 | n=257 |         |
| 34.5    | 5.7     | 34.2  | 5.6   |         |
|         |         | 35.1  | 4.8   |         |
|         |         |       | 38.8  |         |
|         |         |       | 5.2   | <0.0001 |

Standard deviation: SD, Body mass index: BMI, Ovulation induction: OI, Artificial Insemination with husband's semen: AIH.

Assisted reproductive technology: ART, Ages & Stages Questionnaires, Third Edition: ASQ-3.

Table 2. Odds ratios (95% CIs) from logistic regression models for infertility treatment and children’s neurodevelopment at the age of 2 and 3.5 years (n=9,655)

|                    | N     | 2 years |       |       |        |       |          |        |       |    | 3.5 years |       |        |       |          |        |       |
|--------------------|-------|---------|-------|-------|--------|-------|----------|--------|-------|----|-----------|-------|--------|-------|----------|--------|-------|
|                    |       | n       | %     | Crude |        |       | Adjusted |        |       | n  | %         | Crude |        |       | Adjusted |        |       |
|                    |       |         |       | OR    | 95% CI |       | OR       | 95% CI |       |    |           | OR    | 95% CI |       | OR       | 95% CI |       |
|                    |       |         |       |       | Lower  | Upper |          | Lower  | Upper |    |           |       | Lower  | Upper |          | Lower  | Upper |
| Total score        |       |         |       |       |        |       |          |        |       |    |           |       |        |       |          |        |       |
| Natural conception | 8,895 | 1,269   | 14.27 | ref   |        |       |          | ref    |       |    | 1,149     | 12.92 | ref    |       |          | ref    |       |
| OI/AIH             | 273   | 58      | 21.25 | 1.62  | 1.21   | 2.18  | 1.36     | 1.00   | 1.85  | 40 | 14.65     | 1.16  | 0.82   | 1.63  | 1.13     | 0.79   | 1.61  |
| ART                | 487   | 110     | 22.59 | 1.75  | 1.41   | 2.19  | 1.36     | 1.07   | 1.72  | 68 | 13.96     | 1.09  | 0.84   | 1.42  | 1.03     | 0.78   | 1.37  |
| Communication      |       |         |       |       |        |       |          |        |       |    |           |       |        |       |          |        |       |
| Natural conception | 8,895 | 445     | 5.00  | ref   |        |       |          | ref    |       |    | 482       | 5.42  | ref    |       |          | ref    |       |
| OI/AIH             | 273   | 27      | 9.89  | 2.09  | 1.39   | 3.14  | 1.93     | 1.25   | 2.98  | 17 | 6.23      | 1.16  | 0.70   | 1.91  | 1.13     | 0.68   | 1.90  |
| ART                | 487   | 27      | 5.54  | 1.12  | 0.75   | 1.66  | 0.95     | 0.62   | 1.45  | 29 | 5.95      | 1.11  | 0.75   | 1.63  | 1.04     | 0.69   | 1.56  |
| Gross motor        |       |         |       |       |        |       |          |        |       |    |           |       |        |       |          |        |       |
| Natural conception | 8,895 | 483     | 5.43  | ref   |        |       |          | ref    |       |    | 367       | 4.13  | ref    |       |          | ref    |       |
| OI/AIH             | 273   | 20      | 7.33  | 1.38  | 0.87   | 2.19  | 1.15     | 0.72   | 1.85  | 16 | 5.86      | 1.45  | 0.86   | 2.42  | 1.26     | 0.74   | 2.13  |
| ART                | 487   | 49      | 10.06 | 1.95  | 1.43   | 2.65  | 1.50     | 1.08   | 2.09  | 25 | 5.13      | 1.26  | 0.83   | 1.91  | 1.03     | 0.67   | 1.60  |
| Fine motor         |       |         |       |       |        |       |          |        |       |    |           |       |        |       |          |        |       |
| Natural conception | 8,895 | 389     | 4.37  | ref   |        |       |          | ref    |       |    | 513       | 5.77  | ref    |       |          | ref    |       |
| OI/AIH             | 273   | 17      | 6.23  | 1.45  | 0.88   | 2.40  | 1.28     | 0.76   | 2.13  | 19 | 6.96      | 1.22  | 0.76   | 1.97  | 1.20     | 0.74   | 1.96  |
| ART                | 487   | 34      | 6.98  | 1.64  | 1.14   | 2.36  | 1.27     | 0.86   | 1.86  | 31 | 6.37      | 1.11  | 0.76   | 1.62  | 1.05     | 0.71   | 1.56  |
| Problem solving    |       |         |       |       |        |       |          |        |       |    |           |       |        |       |          |        |       |
| Natural conception | 8,895 | 354     | 3.98  | ref   |        |       |          | ref    |       |    | 505       | 5.68  | ref    |       |          | ref    |       |
| OI/AIH             | 273   | 13      | 4.76  | 1.21  | 0.68   | 2.13  | 0.90     | 0.50   | 1.60  | 18 | 6.59      | 1.17  | 0.72   | 1.91  | 1.20     | 0.73   | 1.99  |

|                    |       |     |      |      |      |      |      |      |      |     |      |      |      |      |      |      |      |
|--------------------|-------|-----|------|------|------|------|------|------|------|-----|------|------|------|------|------|------|------|
| ART                | 487   | 32  | 6.57 | 1.70 | 1.17 | 2.47 | 1.18 | 0.79 | 1.75 | 27  | 5.54 | 0.98 | 0.66 | 1.45 | 0.91 | 0.60 | 1.38 |
| Personal-social    |       |     |      |      |      |      |      |      |      |     |      |      |      |      |      |      |      |
| Natural conception | 8,895 | 449 | 5.05 | ref  |      |      | ref  |      |      | 400 | 4.5  | ref  |      |      | ref  |      |      |
| OI/AIH             | 273   | 24  | 8.79 | 1.81 | 1.18 | 2.79 | 1.46 | 0.93 | 2.28 | 16  | 5.86 | 1.32 | 0.79 | 2.21 | 1.20 | 0.70 | 2.04 |
| ART                | 487   | 42  | 8.62 | 1.78 | 1.28 | 2.47 | 1.25 | 0.88 | 1.77 | 28  | 5.75 | 1.30 | 0.87 | 1.92 | 1.05 | 0.69 | 1.60 |

Confidence interval: CI, odds ratio: OR, Ovulation induction: OI, Artificial Insemination with husband's semen: AIH, Assisted reproductive technology: ART

Multivariable logistic models were adjusted for maternal age, parity, gestational week (< 37 weeks), child sex, birth defect, multiple birth, maternal education level, and household income.

1  
2  
3  
4  
5  
6  
7  
8  
9  
10  
11  
12  
13  
14  
15  
16  
17  
18  
19  
20  
21  
22  
23  
24  
25  
26  
27  
28  
29  
30  
31  
32  
33  
34  
35  
36  
37  
38  
39  
40  
41  
42  
43  
44  
45  
46  
47  
48  
49  
50  
51  
52  
53  
54  
55  
56  
57  
58  
59  
60

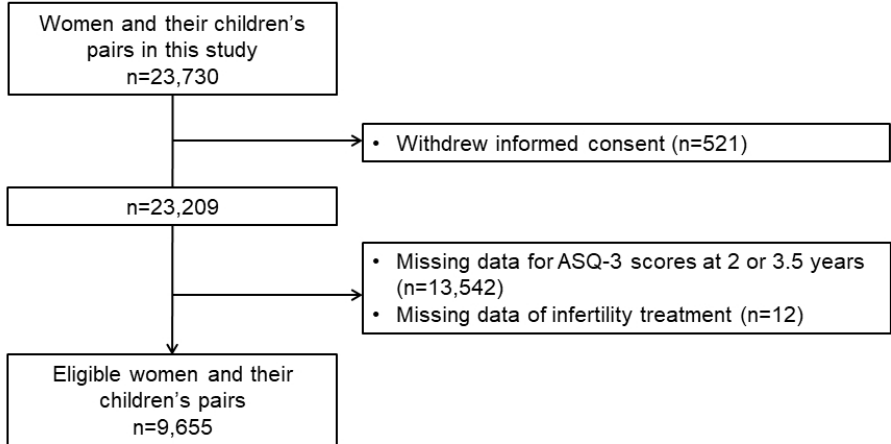

Figure 1. Flow chart of the exclusion criteria in the TMM BirThree Cohort Study

254x190mm (96 x 96 DPI)

**Table S1.** Characteristics of the study population

|                                               | Total   |      | Infertility treatment |      |       |      |       |      |       |      |       |      | p       |
|-----------------------------------------------|---------|------|-----------------------|------|-------|------|-------|------|-------|------|-------|------|---------|
|                                               |         |      | Natural conception    |      | OI    |      | AIH   |      | IVF   |      | ICSI  |      |         |
|                                               | n=9,655 | %    | n=8,895               | %    | n=147 | %    | n=126 | %    | n=342 | %    | n=145 | %    |         |
| <b>Mother's age, mean (SD), y</b>             | 32.7    | 4.7  | 32.4                  | 4.6  | 33.1  | 3.7  | 35.6  | 3.7  | 37.1  | 3.7  | 37.3  | 3.9  | <0.0001 |
| <b>Pre-pregnancy BMI (kg/m<sup>2</sup>)</b>   |         |      |                       |      |       |      |       |      |       |      |       |      |         |
| < 18.5                                        | 1,365   | 14.1 | 1,279                 | 14.4 | 16    | 10.9 | 20    | 15.9 | 29    | 8.5  | 21    | 14.5 | 0.0283  |
| 18.5 to < 25.0                                | 7,204   | 74.6 | 6,636                 | 74.6 | 104   | 70.8 | 92    | 73.0 | 261   | 76.3 | 111   | 76.6 |         |
| ≥ 25.0                                        | 1,083   | 11.2 | 977                   | 11.0 | 27    | 18.4 | 14    | 11.1 | 52    | 15.2 | 13    | 9.0  |         |
| <b>Educational level</b>                      |         |      |                       |      |       |      |       |      |       |      |       |      |         |
| High school graduate or less                  | 2,711   | 28.1 | 2,565                 | 28.8 | 28    | 19.1 | 21    | 16.7 | 74    | 21.6 | 23    | 15.9 | <0.0001 |
| Junior college or vocational college graduate | 3,513   | 36.4 | 3,215                 | 36.1 | 51    | 34.7 | 49    | 38.9 | 135   | 39.5 | 63    | 43.5 |         |
| University graduate or above                  | 2,722   | 28.2 | 2,457                 | 27.6 | 56    | 38.1 | 46    | 36.5 | 111   | 32.5 | 52    | 35.9 |         |
| <b>Household income (JPY/year)</b>            |         |      |                       |      |       |      |       |      |       |      |       |      |         |
| < 4,000,000                                   | 3,117   | 32.3 | 2,974                 | 33.4 | 42    | 28.6 | 21    | 16.7 | 64    | 18.7 | 16    | 11.0 | <0.0001 |
| 4,000,000 to < 6,000,000                      | 3,063   | 31.7 | 2,810                 | 31.6 | 37    | 25.2 | 49    | 38.9 | 120   | 35.1 | 47    | 32.4 |         |
| ≥ 6,000,000                                   | 2,992   | 31.0 | 2,658                 | 29.9 | 62    | 42.2 | 49    | 38.9 | 145   | 42.4 | 78    | 53.8 |         |
| <b>Cigarette smoking</b>                      |         |      |                       |      |       |      |       |      |       |      |       |      |         |
| Never                                         | 6,194   | 64.6 | 5,675                 | 64.3 | 100   | 68.0 | 95    | 75.4 | 221   | 64.8 | 103   | 71.0 | <0.0001 |
| Stopped before pregnancy                      | 2,291   | 23.9 | 2,075                 | 23.5 | 31    | 21.1 | 29    | 23.0 | 115   | 33.7 | 41    | 28.3 |         |
| Stopped after pregnancy                       | 950     | 9.9  | 928                   | 10.5 | 15    | 10.2 | 2     | 1.6  | 5     | 1.5  | 0     | 0.0  |         |
| Smoking at early pregnancy                    | 152     | 1.6  | 150                   | 1.7  | 1     | 0.7  | 0     | 0.0  | 0     | 0.0  | 1     | 0.7  |         |
| <b>Alcohol drinking</b>                       |         |      |                       |      |       |      |       |      |       |      |       |      |         |
| Drinking at early pregnancy                   | 1,917   | 20.0 | 1,766                 | 20.0 | 25    | 17.0 | 32    | 25.6 | 75    | 22.0 | 19    | 13.1 | 0.0741  |
| Former                                        | 3,273   | 34.1 | 3,023                 | 34.2 | 55    | 37.4 | 38    | 30.4 | 112   | 32.8 | 45    | 31.0 |         |
| Never                                         | 3,871   | 40.3 | 3,568                 | 40.4 | 54    | 36.7 | 51    | 40.8 | 128   | 37.5 | 70    | 48.3 |         |
| Cannot drink because of constitution          | 536     | 5.6  | 482                   | 5.5  | 13    | 8.8  | 4     | 3.2  | 26    | 7.6  | 11    | 7.6  |         |
| <b>Parity</b>                                 |         |      |                       |      |       |      |       |      |       |      |       |      |         |
| Nullipara                                     | 4,564   | 47.3 | 4,024                 | 45.2 | 100   | 68.0 | 102   | 81.0 | 242   | 70.8 | 96    | 66.2 | <0.0001 |
| Multipara                                     | 5,091   | 52.7 | 4,871                 | 54.8 | 47    | 32.0 | 24    | 19.1 | 100   | 29.2 | 49    | 33.8 |         |
| <b>Child sex</b>                              |         |      |                       |      |       |      |       |      |       |      |       |      |         |
| Male                                          | 4,958   | 51.4 | 4,581                 | 51.5 | 84    | 57.1 | 53    | 42.1 | 158   | 46.2 | 82    | 56.6 | 0.0205  |
| Female                                        | 4,697   | 48.7 | 4,314                 | 48.5 | 63    | 42.9 | 73    | 57.9 | 184   | 53.8 | 63    | 43.5 |         |
| <b>Gestational week</b>                       |         |      |                       |      |       |      |       |      |       |      |       |      |         |
| ≥37                                           | 9,017   | 93.4 | 8,338                 | 93.7 | 130   | 88.4 | 115   | 91.3 | 302   | 88.3 | 132   | 91.0 | <0.0001 |
| 34 to < 37                                    | 482     | 5.0  | 417                   | 4.7  | 17    | 11.6 | 9     | 7.1  | 28    | 8.2  | 11    | 7.6  |         |
| 29 to < 34                                    | 113     | 1.2  | 98                    | 1.1  | 0     | 0.0  | 2     | 1.6  | 11    | 3.2  | 2     | 1.4  |         |
| < 29                                          | 33      | 0.3  | 32                    | 0.4  | 0     | 0.0  | 0     | 0.0  | 1     | 0.3  | 0     | 0.0  |         |
| <b>Birth weight (g)</b>                       |         |      |                       |      |       |      |       |      |       |      |       |      |         |
| ≥2,500                                        | 8,689   | 90.0 | 8,037                 | 90.4 | 126   | 85.7 | 103   | 81.8 | 294   | 86.0 | 129   | 89.0 | 0.0039  |
| < 2,500                                       | 952     | 9.9  | 844                   | 9.5  | 21    | 14.3 | 23    | 18.3 | 48    | 14.0 | 16    | 11.0 |         |
| <b>Birth defect</b>                           |         |      |                       |      |       |      |       |      |       |      |       |      |         |
| No                                            | 9,477   | 98.3 | 8,740                 | 98.4 | 145   | 98.6 | 124   | 98.4 | 330   | 96.5 | 138   | 95.2 | 0.005   |
| Yes                                           | 169     | 1.8  | 146                   | 1.6  | 2     | 1.4  | 2     | 1.6  | 12    | 3.5  | 7     | 4.8  |         |
| <b>Multiple birth</b>                         |         |      |                       |      |       |      |       |      |       |      |       |      |         |
| No                                            | 9,440   | 97.8 | 8,746                 | 98.3 | 128   | 87.1 | 116   | 92.1 | 311   | 90.9 | 139   | 95.9 | <0.0001 |
| Yes                                           | 215     | 2.2  | 149                   | 1.7  | 19    | 12.9 | 10    | 7.9  | 31    | 9.1  | 6     | 4.1  |         |
| <b>ASQ-3 (2Y)</b>                             |         |      |                       |      |       |      |       |      |       |      |       |      |         |
| > Mean -2SD                                   | 8,218   | 85.1 | 7,626                 | 85.7 | 119   | 81.0 | 96    | 76.2 | 265   | 77.5 | 112   | 77.2 | <0.0001 |
| ≤ Mean-2SD                                    | 1,437   | 14.9 | 1,269                 | 14.3 | 28    | 19.1 | 30    | 23.8 | 77    | 22.5 | 33    | 22.8 |         |
| <b>ASQ-3 (3.5Y)</b>                           |         |      |                       |      |       |      |       |      |       |      |       |      |         |
| > Mean -2SD                                   | 8,398   | 87.0 | 7,746                 | 87.1 | 127   | 86.4 | 106   | 84.1 | 295   | 86.3 | 124   | 85.5 | 0.8329  |
| ≤ Mean-2SD                                    | 1,257   | 13.0 | 1,149                 | 12.9 | 20    | 13.6 | 20    | 15.9 | 47    | 13.7 | 21    | 14.5 |         |
| <b>Father's age, mean (SD), y</b>             | n=4,183 |      | n=3,784               |      | n=74  |      | n=68  |      | n=172 |      | n=85  |      |         |
|                                               | 34.5    | 5.7  | 34.2                  | 5.6  | 34.3  | 4.7  | 35.9  | 4.7  | 38.5  | 5.4  | 39.6  | 4.9  | <0.0001 |

Standard deviation: SD, Body mass index: BMI, Ovulation induction: OI, Artificial Insemination with husband's semen: AIH, In vitro fertilization: IVF, intracytoplasmic sperm injection: ICSI, Ages & Stages Questionnaires, Third Edition: ASQ-3.



**Table S2.** Odds ratios (95% CIs) from logistic regression models for infertility treatment and children's neurodevelopment at the age of 2 and 3.5 years (n=9,655)

|                        | N     | 2 years |       |       |        |       |          |        |       |       | 3.5 years |       |        |       |          |        |       |
|------------------------|-------|---------|-------|-------|--------|-------|----------|--------|-------|-------|-----------|-------|--------|-------|----------|--------|-------|
|                        |       | n       | %     | Crude |        |       | Adjusted |        |       | n     | %         | Crude |        |       | Adjusted |        |       |
|                        |       |         |       | OR    | 95% CI |       | OR       | 95% CI |       |       |           | OR    | 95% CI |       | OR       | 95% CI |       |
|                        |       |         |       |       | Lower  | Upper |          | Lower  | Upper |       |           |       | Lower  | Upper |          | Lower  | Upper |
| <b>Total score</b>     |       |         |       |       |        |       |          |        |       |       |           |       |        |       |          |        |       |
| Natural conception     | 8,895 | 1,269   | 14.27 | ref   |        |       | ref      |        |       | 1,149 | 12.92     | ref   |        |       | ref      |        |       |
| OI                     | 147   | 28      | 19.05 | 1.41  | 0.93   | 2.14  | 1.22     | 0.79   | 1.87  | 20    | 13.61     | 1.06  | 0.66   | 1.71  | 1.01     | 0.62   | 1.64  |
| AIH                    | 126   | 30      | 23.81 | 1.88  | 1.24   | 2.84  | 1.53     | 0.99   | 2.34  | 20    | 15.87     | 1.27  | 0.79   | 2.06  | 1.29     | 0.78   | 2.13  |
| IVF                    | 342   | 77      | 22.51 | 1.75  | 1.35   | 2.27  | 1.34     | 1.02   | 1.76  | 47    | 13.74     | 1.07  | 0.79   | 1.47  | 1.02     | 0.73   | 1.42  |
| ICSI                   | 145   | 33      | 22.76 | 1.77  | 1.20   | 2.62  | 1.41     | 0.94   | 2.11  | 21    | 14.48     | 1.14  | 0.72   | 1.82  | 1.07     | 0.66   | 1.74  |
| <b>Communication</b>   |       |         |       |       |        |       |          |        |       |       |           |       |        |       |          |        |       |
| Natural conception     | 8,895 | 445     | 5     | ref   |        |       | ref      |        |       | 482   | 5.42      | ref   |        |       | ref      |        |       |
| OI                     | 147   | 16      | 10.88 | 2.32  | 1.37   | 3.93  | 2.12     | 1.22   | 3.69  | 9     | 6.12      | 1.14  | 0.58   | 2.25  | 1.05     | 0.52   | 2.12  |
| AIH                    | 126   | 11      | 8.73  | 1.82  | 0.97   | 3.40  | 1.71     | 0.88   | 3.30  | 8     | 6.35      | 1.18  | 0.58   | 2.44  | 1.23     | 0.59   | 2.59  |
| IVF                    | 342   | 19      | 5.56  | 1.12  | 0.70   | 1.79  | 0.94     | 0.57   | 1.54  | 20    | 5.85      | 1.08  | 0.68   | 1.72  | 1.02     | 0.63   | 1.64  |
| ICSI                   | 145   | 8       | 5.52  | 1.11  | 0.54   | 2.28  | 0.98     | 0.47   | 2.05  | 9     | 6.21      | 1.16  | 0.59   | 2.28  | 1.10     | 0.55   | 2.20  |
| <b>Gross motor</b>     |       |         |       |       |        |       |          |        |       |       |           |       |        |       |          |        |       |
| Natural conception     | 8,895 | 483     | 5.43  | ref   |        |       | ref      |        |       | 367   | 4.13      | ref   |        |       | ref      |        |       |
| OI                     | 147   | 7       | 4.76  | 0.87  | 0.41   | 1.87  | 0.76     | 0.35   | 1.64  | 8     | 5.44      | 1.34  | 0.65   | 2.75  | 1.19     | 0.57   | 2.48  |
| AIH                    | 126   | 13      | 10.32 | 2.00  | 1.12   | 3.58  | 1.59     | 0.88   | 2.89  | 8     | 6.35      | 1.58  | 0.76   | 3.25  | 1.32     | 0.63   | 2.77  |
| IVF                    | 342   | 32      | 9.36  | 1.80  | 1.24   | 2.62  | 1.38     | 0.93   | 2.05  | 14    | 4.09      | 0.99  | 0.58   | 1.71  | 0.80     | 0.45   | 1.40  |
| ICSI                   | 145   | 17      | 11.72 | 2.31  | 1.38   | 3.87  | 1.81     | 1.07   | 3.07  | 11    | 7.59      | 1.91  | 1.02   | 3.56  | 1.64     | 0.87   | 3.12  |
| <b>Fine motor</b>      |       |         |       |       |        |       |          |        |       |       |           |       |        |       |          |        |       |
| Natural conception     | 8,895 | 389     | 4.37  | ref   |        |       | ref      |        |       | 513   | 5.77      | ref   |        |       | ref      |        |       |
| OI                     | 147   | 7       | 4.76  | 1.09  | 0.51   | 2.35  | 1.02     | 0.47   | 2.22  | 10    | 6.8       | 1.19  | 0.62   | 2.28  | 1.12     | 0.58   | 2.17  |
| AIH                    | 126   | 10      | 7.94  | 1.89  | 0.98   | 3.63  | 1.55     | 0.80   | 3.03  | 9     | 7.14      | 1.26  | 0.63   | 2.49  | 1.29     | 0.64   | 2.62  |
| IVF                    | 342   | 27      | 7.89  | 1.87  | 1.25   | 2.81  | 1.45     | 0.95   | 2.22  | 18    | 5.26      | 0.91  | 0.56   | 1.47  | 0.86     | 0.52   | 1.43  |
| ICSI                   | 145   | 7       | 4.83  | 1.11  | 0.52   | 2.39  | 0.87     | 0.40   | 1.89  | 13    | 8.97      | 1.61  | 0.90   | 2.86  | 1.49     | 0.82   | 2.70  |
| <b>Problem solving</b> |       |         |       |       |        |       |          |        |       |       |           |       |        |       |          |        |       |
| Natural conception     | 8,895 | 354     | 3.98  | ref   |        |       | ref      |        |       | 505   | 5.68      | ref   |        |       | ref      |        |       |
| OI                     | 147   | 6       | 4.08  | 1.03  | 0.45   | 2.34  | 0.80     | 0.34   | 1.84  | 9     | 6.12      | 1.08  | 0.55   | 2.14  | 1.12     | 0.56   | 2.23  |
| AIH                    | 126   | 7       | 5.56  | 1.42  | 0.66   | 3.06  | 1.00     | 0.46   | 2.20  | 9     | 7.14      | 1.28  | 0.65   | 2.53  | 1.31     | 0.65   | 2.64  |
| IVF                    | 342   | 22      | 6.43  | 1.66  | 1.06   | 2.59  | 1.13     | 0.70   | 1.80  | 20    | 5.85      | 1.03  | 0.65   | 1.64  | 0.98     | 0.60   | 1.57  |
| ICSI                   | 145   | 10      | 6.9   | 1.79  | 0.93   | 3.43  | 1.31     | 0.67   | 2.55  | 7     | 4.83      | 0.84  | 0.39   | 1.81  | 0.76     | 0.35   | 1.66  |
| <b>Personal-social</b> |       |         |       |       |        |       |          |        |       |       |           |       |        |       |          |        |       |
| Natural conception     | 8,895 | 449     | 5.05  | ref   |        |       | ref      |        |       | 400   | 4.5       | ref   |        |       | ref      |        |       |
| OI                     | 147   | 10      | 6.8   | 1.37  | 0.72   | 2.63  | 1.17     | 0.60   | 2.27  | 8     | 5.44      | 1.22  | 0.60   | 2.51  | 1.13     | 0.54   | 2.35  |
| AIH                    | 126   | 14      | 11.11 | 2.35  | 1.34   | 4.13  | 1.77     | 0.99   | 3.19  | 8     | 6.35      | 1.44  | 0.70   | 2.97  | 1.28     | 0.60   | 2.70  |
| IVF                    | 342   | 26      | 7.6   | 1.55  | 1.03   | 2.33  | 1.09     | 0.71   | 1.68  | 20    | 5.85      | 1.32  | 0.83   | 2.10  | 1.09     | 0.67   | 1.78  |
| ICSI                   | 145   | 16      | 11.03 | 2.33  | 1.38   | 3.96  | 1.63     | 0.94   | 2.82  | 8     | 5.52      | 1.24  | 0.60   | 2.55  | 0.97     | 0.46   | 2.02  |

Confidence interval: CI, odds ratio: OR, Ovulation induction: OI, Artificial Insemination with husband's semen: AIH, In vitro fertilization: IVF, intracytoplasmic sperm injection: ICSI.

Multivariable logistic models were adjusted for maternal age, parity, gestational week, child sex, birth defect, multiple birth, maternal education level, and household income.

**Table S3.** Characteristics of study population for ET

|                                               | Total   |      | Natural conception |      | ART (n=485) |      |                  |      |         |      | P       |
|-----------------------------------------------|---------|------|--------------------|------|-------------|------|------------------|------|---------|------|---------|
|                                               | n=9,382 | %    | n=8,895            | %    | Fresh ET    |      | Frozen-thawed ET |      | Missing |      |         |
|                                               |         |      |                    |      | n=46        | %    | n=314            | %    | n=127   | %    |         |
| <b>Mother's age, mean (SD), y</b>             | 32.7    | 4.7  | 32.4               | 4.6  | 37.8        | 3.6  | 37.3             | 3.8  | 36.8    | 3.6  | <0.0001 |
| <b>Pre-pregnancy BMI (kg/m<sup>2</sup>)</b>   |         |      |                    |      |             |      |                  |      |         |      |         |
| < 18.5                                        | 1,329   | 14.2 | 1,279              | 14.4 | 9           | 19.6 | 30               | 9.6  | 11      | 8.7  | 0.2997  |
| 18.5 to < 25.0                                | 7,008   | 74.7 | 6,636              | 74.6 | 32          | 69.6 | 242              | 77.1 | 98      | 77.2 |         |
| ≥ 25.0                                        | 1,042   | 11.1 | 977                | 11.0 | 5           | 10.9 | 42               | 13.4 | 18      | 14.2 |         |
| <b>Educational level</b>                      |         |      |                    |      |             |      |                  |      |         |      |         |
| High school graduate or less                  | 2,662   | 28.4 | 2,565              | 28.8 | 9           | 19.6 | 64               | 20.4 | 24      | 18.9 | 0.0018  |
| Junior college or vocational college graduate | 3,413   | 36.4 | 3,215              | 36.1 | 23          | 50.0 | 122              | 38.9 | 53      | 41.7 |         |
| University graduate or above                  | 2,620   | 27.9 | 2,457              | 27.6 | 12          | 26.1 | 111              | 35.4 | 40      | 31.5 |         |
| <b>Household income (JPY/year)</b>            |         |      |                    |      |             |      |                  |      |         |      |         |
| < 4,000,000                                   | 3,054   | 32.6 | 2,974              | 33.4 | 6           | 13.0 | 53               | 16.9 | 21      | 16.5 | <0.0001 |
| 4,000,000 to < 6,000,000                      | 2,977   | 31.7 | 2,810              | 31.6 | 16          | 34.8 | 108              | 34.4 | 43      | 33.9 |         |
| ≥ 6,000,000                                   | 2,881   | 30.7 | 2,658              | 29.9 | 22          | 47.8 | 144              | 45.9 | 57      | 44.9 |         |
| <b>Cigarette smoking</b>                      |         |      |                    |      |             |      |                  |      |         |      |         |
| Never                                         | 5,999   | 64.4 | 5,675              | 64.3 | 24          | 52.2 | 209              | 66.8 | 91      | 71.7 | <0.0001 |
| Stopped before pregnancy                      | 2,231   | 24.0 | 2,075              | 23.5 | 22          | 47.8 | 99               | 31.6 | 35      | 27.6 |         |
| Stopped after pregnancy                       | 933     | 10.0 | 928                | 10.5 | 0           | 0.0  | 4                | 1.3  | 1       | 0.8  |         |
| Smoking at early pregnancy                    | 151     | 1.6  | 150                | 1.7  | 0           | 0.0  | 1                | 0.3  | 0       | 0.0  |         |
| <b>Alcohol drinking</b>                       |         |      |                    |      |             |      |                  |      |         |      |         |
| Drinking at early pregnancy                   | 1,860   | 20.0 | 1,766              | 20.0 | 6           | 13.0 | 60               | 19.2 | 28      | 22.1 | 0.2181  |
| Former                                        | 3,180   | 34.1 | 3,023              | 34.2 | 22          | 47.8 | 98               | 31.3 | 37      | 29.1 |         |
| Never                                         | 3,766   | 40.4 | 3,568              | 40.4 | 16          | 34.8 | 128              | 40.9 | 54      | 42.5 |         |
| Cannot drink because of constitution          | 519     | 5.6  | 482                | 5.5  | 2           | 4.4  | 27               | 8.6  | 8       | 6.3  |         |
| <b>Parity</b>                                 |         |      |                    |      |             |      |                  |      |         |      |         |
| Nullipara                                     | 4,362   | 46.5 | 4,024              | 45.2 | 35          | 76.1 | 212              | 67.5 | 91      | 71.7 | <0.0001 |
| Multipara                                     | 5,020   | 53.5 | 4,871              | 54.8 | 11          | 23.9 | 102              | 32.5 | 36      | 28.4 |         |
| <b>Child sex</b>                              |         |      |                    |      |             |      |                  |      |         |      |         |
| Male                                          | 4,821   | 51.4 | 4,581              | 51.5 | 22          | 47.8 | 156              | 49.7 | 62      | 48.8 | 0.806   |
| Female                                        | 4,561   | 48.6 | 4,314              | 48.5 | 24          | 52.2 | 158              | 50.3 | 65      | 51.2 |         |
| <b>Gestational week</b>                       |         |      |                    |      |             |      |                  |      |         |      |         |
| ≥37                                           | 8,772   | 93.5 | 8,338              | 93.7 | 38          | 82.6 | 285              | 90.8 | 111     | 87.4 | <0.0001 |
| < 37                                          | 610     | 6.5  | 557                | 6.3  | 8           | 17.4 | 29               | 9.2  | 16      | 12.6 |         |
| <b>Birth weight (g)</b>                       |         |      |                    |      |             |      |                  |      |         |      |         |
| ≥2,500                                        | 8,460   | 90.2 | 8,037              | 90.4 | 41          | 89.1 | 277              | 88.2 | 105     | 82.7 | 0.0814  |
| < 2,500                                       | 908     | 9.7  | 844                | 9.5  | 5           | 10.9 | 37               | 11.8 | 22      | 17.3 |         |
| <b>Birth defect</b>                           |         |      |                    |      |             |      |                  |      |         |      |         |
| No                                            | 9,208   | 98.2 | 8,740              | 98.4 | 45          | 97.8 | 302              | 96.2 | 121     | 95.3 | 0.0019  |
| Yes                                           | 165     | 1.8  | 146                | 1.6  | 1           | 2.2  | 12               | 3.8  | 6       | 4.7  |         |
| <b>Multiple birth</b>                         |         |      |                    |      |             |      |                  |      |         |      |         |
| No                                            | 9,196   | 98.0 | 8,746              | 98.3 | 42          | 91.3 | 287              | 91.4 | 121     | 95.3 | <0.0001 |
| Yes                                           | 186     | 2.0  | 149                | 1.7  | 4           | 8.7  | 27               | 8.6  | 6       | 4.7  |         |
| <b>ASQ-3 (2Y)</b>                             |         |      |                    |      |             |      |                  |      |         |      |         |
| > Mean -2SD                                   | 8,003   | 85.3 | 7,626              | 85.7 | 33          | 71.7 | 242              | 77.1 | 102     | 80.3 | <0.0001 |
| ≤ Mean-2SD                                    | 1,379   | 14.7 | 1,269              | 14.3 | 13          | 28.3 | 72               | 22.9 | 25      | 19.7 |         |
| <b>ASQ-3 (3.5Y)</b>                           |         |      |                    |      |             |      |                  |      |         |      |         |
| > Mean -2SD                                   | 8,165   | 87.0 | 7,746              | 87.1 | 39          | 84.8 | 269              | 85.7 | 111     | 87.4 | 0.8594  |
| ≤ Mean-2SD                                    | 1,217   | 13.0 | 1,149              | 12.9 | 7           | 15.2 | 45               | 14.3 | 16      | 12.6 |         |
| <b>Father's age, mean (SD), y</b>             | n=4,041 |      | n=3,784            |      | n=25        |      | n=169            |      | n=63    |      |         |
|                                               | 34.5    | 5.7  | 34.2               | 5.6  | 38.9        | 4.1  | 38.9             | 5.3  | 38.8    | 5.4  | <0.0001 |

Standard deviation: SD, Body mass index: BMI, Embryo transfer: ET, Assisted reproductive technology: ART, Ages &amp; Stages Questionnaires, Third Edition: ASQ-3.

**Table S4.** Odds ratios (95% CIs) from logistic regression models for ET and children's neurodevelopment at the age of 2 and 3.5 years (n=485)

|                    | 2 years |       |       |       |        |       |          |        |       | 3.5 years |       |       |        |       |          |        |       |  |
|--------------------|---------|-------|-------|-------|--------|-------|----------|--------|-------|-----------|-------|-------|--------|-------|----------|--------|-------|--|
|                    | N       | n     | %     | Crude |        |       | Adjusted |        |       | n         | %     | Crude |        |       | Adjusted |        |       |  |
|                    |         |       |       | OR    | 95% CI |       | OR       | 95% CI |       |           |       | OR    | 95% CI |       | OR       | 95% CI |       |  |
|                    |         |       |       |       | Lower  | Upper |          | Lower  | Upper |           |       |       | Lower  | Upper |          | Lower  | Upper |  |
| Total score        |         |       |       |       |        |       |          |        |       |           |       |       |        |       |          |        |       |  |
| Natural conception | 8,895   | 1,269 | 14.27 | ref   |        |       | ref      |        |       | 1,149     | 12.92 | ref   |        |       | ref      |        |       |  |
| Fresh ET           | 46      | 13    | 28.26 | 2.37  | 1.24   | 4.51  | 1.71     | 0.88   | 3.33  | 7         | 15.22 | 1.21  | 0.54   | 2.71  | 1.12     | 0.49   | 2.58  |  |
| Frozen-thawed ET   | 314     | 72    | 22.93 | 1.79  | 1.37   | 2.34  | 1.39     | 1.05   | 1.85  | 45        | 14.33 | 1.13  | 0.82   | 1.56  | 1.07     | 0.76   | 1.50  |  |
| Communication      |         |       |       |       |        |       |          |        |       |           |       |       |        |       |          |        |       |  |
| Natural conception | 8,895   | 445   | 5     | ref   |        |       | ref      |        |       | 482       | 5.42  | ref   |        |       | ref      |        |       |  |
| Fresh ET           | 46      | 4     | 8.7   | 1.81  | 0.65   | 5.07  | 1.43     | 0.49   | 4.19  | 1         | 2.17  | 0.39  | 0.05   | 2.82  | 0.33     | 0.04   | 2.42  |  |
| Frozen-thawed ET   | 314     | 16    | 5.1   | 1.02  | 0.61   | 1.70  | 0.88     | 0.52   | 1.50  | 23        | 7.32  | 1.38  | 0.89   | 2.13  | 1.28     | 0.81   | 2.02  |  |
| Gross motor        |         |       |       |       |        |       |          |        |       |           |       |       |        |       |          |        |       |  |
| Natural conception | 8,895   | 483   | 5.43  | ref   |        |       | ref      |        |       | 367       | 4.13  | ref   |        |       | ref      |        |       |  |
| Fresh ET           | 46      | 5     | 10.87 | 2.12  | 0.84   | 5.40  | 1.51     | 0.59   | 3.90  | 2         | 4.35  | 1.06  | 0.26   | 4.37  | 0.84     | 0.20   | 3.53  |  |
| Frozen-thawed ET   | 314     | 34    | 10.83 | 2.12  | 1.47   | 3.06  | 1.65     | 1.12   | 2.43  | 21        | 6.69  | 1.67  | 1.06   | 2.63  | 1.37     | 0.85   | 2.21  |  |
| Fine motor         |         |       |       |       |        |       |          |        |       |           |       |       |        |       |          |        |       |  |
| Natural conception | 8,895   | 389   | 4.37  | ref   |        |       | ref      |        |       | 513       | 5.77  | ref   |        |       | ref      |        |       |  |
| Fresh ET           | 46      | 3     | 6.52  | 1.53  | 0.47   | 4.94  | 1.06     | 0.32   | 3.47  | 3         | 6.52  | 1.14  | 0.35   | 3.69  | 1.11     | 0.34   | 3.67  |  |
| Frozen-thawed ET   | 314     | 21    | 6.69  | 1.57  | 1.00   | 2.47  | 1.21     | 0.75   | 1.94  | 19        | 6.05  | 1.05  | 0.66   | 1.69  | 1.01     | 0.62   | 1.65  |  |
| Problem solving    |         |       |       |       |        |       |          |        |       |           |       |       |        |       |          |        |       |  |
| Natural conception | 8,895   | 354   | 3.98  | ref   |        |       | ref      |        |       | 505       | 5.68  | ref   |        |       | ref      |        |       |  |
| Fresh ET           | 46      | 3     | 6.52  | 1.68  | 0.52   | 5.45  | 1.07     | 0.32   | 3.56  | 1         | 2.17  | 0.37  | 0.05   | 2.68  | 0.34     | 0.05   | 2.49  |  |
| Frozen-thawed ET   | 314     | 23    | 7.32  | 1.91  | 1.23   | 2.95  | 1.33     | 0.84   | 2.11  | 18        | 5.73  | 1.01  | 0.62   | 1.64  | 0.95     | 0.57   | 1.56  |  |
| Personal-social    |         |       |       |       |        |       |          |        |       |           |       |       |        |       |          |        |       |  |
| Natural conception | 8,895   | 449   | 5.05  | ref   |        |       | ref      |        |       | 400       | 4.5   | ref   |        |       | ref      |        |       |  |
| Fresh ET           | 46      | 3     | 6.52  | 1.31  | 0.41   | 4.25  | 0.82     | 0.25   | 2.74  | 2         | 4.35  | 0.97  | 0.23   | 4.00  | 0.75     | 0.18   | 3.19  |  |
| Frozen-thawed ET   | 314     | 36    | 11.46 | 2.44  | 1.70   | 3.49  | 1.76     | 1.20   | 2.58  | 17        | 5.41  | 1.22  | 0.74   | 2.00  | 0.99     | 0.59   | 1.66  |  |

Confidence interval: CI, odds ratio: OR, Embryo transfer: ET.

Multivariable logistic models were adjusted for maternal age, parity, gestational week, child sex, birth defect, multiple birth, maternal education level, and household income.

**Table S5.** Odds ratios (95% CIs) from logistic regression models for infertility treatment and children's neurodevelopment at the age of 2 and 3.5 years (n=9,271)

|                        | N     | n     | %     | 2 years |        |      |          |        |      | 3.5 years |        |       |          |        |       |       |      |
|------------------------|-------|-------|-------|---------|--------|------|----------|--------|------|-----------|--------|-------|----------|--------|-------|-------|------|
|                        |       |       |       | Crude   |        |      | Adjusted |        |      | Crude     |        |       | Adjusted |        |       |       |      |
|                        |       |       |       | OR      | 95% CI |      | OR       | 95% CI |      | OR        | 95% CI |       | OR       | 95% CI |       |       |      |
|                        |       |       |       | Lower   | Upper  |      | Lower    | Upper  | n    | %         |        | Lower | Upper    |        | Lower | Upper |      |
| <b>Total score</b>     |       |       |       |         |        |      |          |        |      |           |        |       |          |        |       |       |      |
| Natural conception     | 8,602 | 1,200 | 13.95 | ref     |        |      | ref      |        |      | 1,092     | 12.69  | ref   |          |        | ref   |       |      |
| OI/AIH                 | 239   | 48    | 20.08 | 1.55    | 1.12   | 2.14 | 1.36     | 0.98   | 1.89 | 35        | 14.64  | 1.18  | 0.82     | 1.70   | 1.20  | 0.83  | 1.75 |
| ART                    | 430   | 90    | 20.93 | 1.63    | 1.28   | 2.08 | 1.33     | 1.03   | 1.71 | 57        | 13.26  | 1.05  | 0.79     | 1.40   | 1.05  | 0.78  | 1.41 |
| <b>Communication</b>   |       |       |       |         |        |      |          |        |      |           |        |       |          |        |       |       |      |
| Natural conception     | 8,602 | 411   | 4.78  | ref     |        |      | ref      |        |      | 452       | 5.25   | ref   |          |        | ref   |       |      |
| OI/AIH                 | 239   | 19    | 7.95  | 1.72    | 1.07   | 2.78 | 1.77     | 1.08   | 2.90 | 15        | 6.28   | 1.21  | 0.71     | 2.05   | 1.30  | 0.76  | 2.23 |
| ART                    | 430   | 19    | 4.42  | 0.92    | 0.58   | 1.48 | 0.87     | 0.53   | 1.41 | 22        | 5.12   | 0.97  | 0.63     | 1.51   | 1.01  | 0.64  | 1.59 |
| <b>Gross motor</b>     |       |       |       |         |        |      |          |        |      |           |        |       |          |        |       |       |      |
| Spontaneous pregnancy  | 8,602 | 452   | 5.25  | ref     |        |      | ref      |        |      | 336       | 3.91   | ref   |          |        | ref   |       |      |
| OI/AIH                 | 239   | 17    | 7.11  | 1.38    | 0.84   | 2.28 | 1.14     | 0.69   | 1.90 | 13        | 5.44   | 1.42  | 0.80     | 2.50   | 1.26  | 0.71  | 2.24 |
| ART                    | 430   | 40    | 9.30  | 1.85    | 1.32   | 2.60 | 1.50     | 1.05   | 2.14 | 21        | 4.88   | 1.26  | 0.80     | 1.99   | 1.10  | 0.69  | 1.76 |
| <b>Fine motor</b>      |       |       |       |         |        |      |          |        |      |           |        |       |          |        |       |       |      |
| Natural conception     | 8,602 | 363   | 4.22  | ref     |        |      | ref      |        |      | 479       | 5.57   | ref   |          |        | ref   |       |      |
| OI/AIH                 | 239   | 17    | 7.11  | 1.74    | 1.05   | 2.88 | 1.51     | 0.90   | 2.52 | 16        | 6.69   | 1.22  | 0.73     | 2.04   | 1.19  | 0.70  | 2.02 |
| ART                    | 430   | 30    | 6.98  | 1.70    | 1.16   | 2.50 | 1.33     | 0.89   | 2.00 | 26        | 6.05   | 1.09  | 0.73     | 1.64   | 1.09  | 0.71  | 1.67 |
| <b>Problem solving</b> |       |       |       |         |        |      |          |        |      |           |        |       |          |        |       |       |      |
| Natural conception     | 8,602 | 326   | 3.79  | ref     |        |      | ref      |        |      | 475       | 5.52   | ref   |          |        | ref   |       |      |
| OI/AIH                 | 239   | 11    | 4.6   | 1.23    | 0.66   | 2.27 | 0.98     | 0.53   | 1.84 | 17        | 7.11   | 1.31  | 0.79     | 2.17   | 1.34  | 0.80  | 2.24 |
| ART                    | 430   | 25    | 5.81  | 1.57    | 1.03   | 2.38 | 1.20     | 0.77   | 1.85 | 22        | 5.12   | 0.92  | 0.60     | 1.43   | 0.89  | 0.57  | 1.40 |
| <b>Personal-social</b> |       |       |       |         |        |      |          |        |      |           |        |       |          |        |       |       |      |
| Natural conception     | 8,602 | 417   | 4.85  | ref     |        |      | ref      |        |      | 372       | 4.32   | ref   |          |        | ref   |       |      |
| OI/AIH                 | 239   | 21    | 8.79  | 1.89    | 1.20   | 2.99 | 1.55     | 0.97   | 2.49 | 15        | 6.28   | 1.48  | 0.87     | 2.52   | 1.35  | 0.78  | 2.34 |
| ART                    | 430   | 35    | 8.14  | 1.74    | 1.21   | 2.49 | 1.28     | 0.88   | 1.86 | 22        | 5.12   | 1.19  | 0.77     | 1.86   | 1.02  | 0.65  | 1.62 |

Confidence interval: CI, odds ratio: OR, Ovulation induction: OI, Artificial Insemination with husband's semen: AIH, Assisted reproductive technology: ART.

Multivariable logistic models were adjusted for maternal age, parity, gestational week, childsex, maternal education level, and household income.

**Table S6.** Odds ratios (95% CIs) from logistic regression models for infertility treatment and children's neurodevelopment at the age of 2 and 3.5 years (n=9,655)

|                        | N     | n     | %     | 2 years |        |      |          |        |      | 3.5 years |        |       |          |        |       |       |      |  |
|------------------------|-------|-------|-------|---------|--------|------|----------|--------|------|-----------|--------|-------|----------|--------|-------|-------|------|--|
|                        |       |       |       | Crude   |        |      | Adjusted |        |      | Crude     |        |       | Adjusted |        |       |       |      |  |
|                        |       |       |       | OR      | 95% CI |      | OR       | 95% CI |      | OR        | 95% CI |       | OR       | 95% CI |       |       |      |  |
|                        |       |       |       | Lower   | Upper  |      | Lower    | Upper  | n    | %         |        | Lower | Upper    | OR     | Lower | Upper |      |  |
| <b>Total score</b>     |       |       |       |         |        |      |          |        |      |           |        |       |          |        |       |       |      |  |
| Natural conception     | 8,895 | 1,270 | 14.27 | ref     |        |      | ref      |        |      | 1,150     | 12.92  | ref   |          |        | ref   |       |      |  |
| OI/AIH                 | 273   | 58    | 21.32 | 1.55    | 1.12   | 2.14 | 1.38     | 1.01   | 1.87 | 40        | 14.71  | 1.18  | 0.82     | 1.70   | 1.15  | 0.81  | 1.64 |  |
| ART                    | 487   | 109   | 22.47 | 1.63    | 1.28   | 2.08 | 1.37     | 1.08   | 1.73 | 67        | 13.81  | 1.05  | 0.79     | 1.40   | 1.04  | 0.78  | 1.37 |  |
| <b>Communication</b>   |       |       |       |         |        |      |          |        |      |           |        |       |          |        |       |       |      |  |
| Natural conception     | 8,895 | 446   | 5.01  | ref     |        |      | ref      |        |      | 483       | 5.43   | ref   |          |        | ref   |       |      |  |
| OI/AIH                 | 273   | 27    | 9.93  | 1.72    | 1.07   | 2.78 | 1.99     | 1.29   | 3.08 | 17        | 6.25   | 1.21  | 0.71     | 2.05   | 1.16  | 0.69  | 1.94 |  |
| ART                    | 487   | 26    | 5.36  | 0.92    | 0.58   | 1.48 | 0.96     | 0.63   | 1.47 | 28        | 5.77   | 0.97  | 0.63     | 1.51   | 1.05  | 0.70  | 1.57 |  |
| <b>Gross motor</b>     |       |       |       |         |        |      |          |        |      |           |        |       |          |        |       |       |      |  |
| Spontaneous pregnancy  | 8,895 | 484   | 5.44  | ref     |        |      | ref      |        |      | 367       | 4.12   | ref   |          |        | ref   |       |      |  |
| OI/AIH                 | 273   | 20    | 7.35  | 1.38    | 0.84   | 2.28 | 1.18     | 0.73   | 1.89 | 16        | 5.88   | 1.42  | 0.80     | 2.50   | 1.32  | 0.78  | 2.24 |  |
| ART                    | 487   | 48    | 9.90  | 1.85    | 1.32   | 2.60 | 1.53     | 1.10   | 2.13 | 25        | 5.15   | 1.26  | 0.80     | 1.99   | 1.04  | 0.67  | 1.62 |  |
| <b>Fine motor</b>      |       |       |       |         |        |      |          |        |      |           |        |       |          |        |       |       |      |  |
| Natural conception     | 8,895 | 389   | 4.37  | ref     |        |      | ref      |        |      | 514       | 5.78   | ref   |          |        | ref   |       |      |  |
| OI/AIH                 | 273   | 17    | 6.25  | 1.74    | 1.05   | 2.88 | 1.34     | 0.80   | 2.23 | 19        | 6.99   | 1.22  | 0.73     | 2.04   | 1.24  | 0.76  | 2.02 |  |
| ART                    | 487   | 34    | 7.01  | 1.70    | 1.16   | 2.50 | 1.29     | 0.88   | 1.90 | 30        | 6.19   | 1.09  | 0.73     | 1.64   | 1.05  | 0.71  | 1.57 |  |
| <b>Problem solving</b> |       |       |       |         |        |      |          |        |      |           |        |       |          |        |       |       |      |  |
| Natural conception     | 8,895 | 354   | 3.98  | ref     |        |      | ref      |        |      | 506       | 5.69   | ref   |          |        | ref   |       |      |  |
| OI/AIH                 | 273   | 13    | 4.78  | 1.23    | 0.66   | 2.27 | 0.93     | 0.52   | 1.67 | 18        | 6.62   | 1.31  | 0.79     | 2.17   | 1.24  | 0.75  | 2.05 |  |
| ART                    | 487   | 32    | 6.60  | 1.57    | 1.03   | 2.38 | 1.19     | 0.80   | 1.77 | 26        | 5.36   | 0.92  | 0.60     | 1.43   | 0.91  | 0.60  | 1.37 |  |
| <b>Personal-social</b> |       |       |       |         |        |      |          |        |      |           |        |       |          |        |       |       |      |  |
| Natural conception     | 8,895 | 449   | 5.05  | ref     |        |      | ref      |        |      | 401       | 4.51   | ref   |          |        | ref   |       |      |  |
| OI/AIH                 | 273   | 24    | 8.82  | 1.89    | 1.20   | 2.99 | 1.52     | 0.98   | 2.38 | 16        | 5.88   | 1.48  | 0.87     | 2.52   | 1.23  | 0.72  | 2.09 |  |
| ART                    | 487   | 42    | 8.66  | 1.74    | 1.21   | 2.49 | 1.27     | 0.89   | 1.80 | 27        | 5.57   | 1.19  | 0.77     | 1.86   | 1.06  | 0.70  | 1.60 |  |

Confidence interval: CI, odds ratio: OR, Ovulation induction: OI, Artificial Insemination with husband's semen: AIH, Assisted reproductive technology: ART.

Multivariable logistic models were adjusted for maternal age, parity, gestational week (< 29, 29–34, 34–37, ≥ 37 weeks), child sex, birth defect, multiple birth, maternal education level, and household income.

**Table S7.** Odds ratios (95% CIs) from logistic regression models for infertility treatment and children's neurodevelopment at the age of 2 and 3.5 years (n=9,655)

|                        | N     | n     | %     | 2 years |        |      |          |        |      | 3.5 years |        |       |          |        |       |       |      |  |
|------------------------|-------|-------|-------|---------|--------|------|----------|--------|------|-----------|--------|-------|----------|--------|-------|-------|------|--|
|                        |       |       |       | Crude   |        |      | Adjusted |        |      | Crude     |        |       | Adjusted |        |       |       |      |  |
|                        |       |       |       | OR      | 95% CI |      | OR       | 95% CI |      | OR        | 95% CI |       | OR       | 95% CI |       |       |      |  |
|                        |       |       |       | Lower   | Upper  |      | Lower    | Upper  | n    | %         |        | Lower | Upper    | OR     | Lower | Upper |      |  |
| <b>Total score</b>     |       |       |       |         |        |      |          |        |      |           |        |       |          |        |       |       |      |  |
| Natural conception     | 8,895 | 1,270 | 14.27 | ref     |        |      | ref      |        |      | 1,150     | 12.92  | ref   |          |        | ref   |       |      |  |
| OI/AIH                 | 273   | 58    | 21.32 | 1.55    | 1.12   | 2.14 | 1.35     | 0.99   | 1.84 | 40        | 14.71  | 1.18  | 0.82     | 1.70   | 1.12  | 0.79  | 1.60 |  |
| ART                    | 487   | 109   | 22.47 | 1.63    | 1.28   | 2.08 | 1.37     | 1.08   | 1.73 | 67        | 13.81  | 1.05  | 0.79     | 1.40   | 1.04  | 0.79  | 1.38 |  |
| <b>Communication</b>   |       |       |       |         |        |      |          |        |      |           |        |       |          |        |       |       |      |  |
| Natural conception     | 8,895 | 446   | 5.01  | ref     |        |      | ref      |        |      | 483       | 5.43   | ref   |          |        | ref   |       |      |  |
| OI/AIH                 | 273   | 27    | 9.93  | 1.72    | 1.07   | 2.78 | 1.93     | 1.25   | 2.97 | 17        | 6.25   | 1.21  | 0.71     | 2.05   | 1.12  | 0.67  | 1.88 |  |
| ART                    | 487   | 26    | 5.36  | 0.92    | 0.58   | 1.48 | 0.96     | 0.63   | 1.46 | 28        | 5.77   | 0.97  | 0.63     | 1.51   | 1.06  | 0.70  | 1.59 |  |
| <b>Gross motor</b>     |       |       |       |         |        |      |          |        |      |           |        |       |          |        |       |       |      |  |
| Spontaneous pregnancy  | 8,895 | 484   | 5.44  | ref     |        |      | ref      |        |      | 367       | 4.12   | ref   |          |        | ref   |       |      |  |
| OI/AIH                 | 273   | 20    | 7.35  | 1.38    | 0.84   | 2.28 | 1.14     | 0.71   | 1.84 | 16        | 5.88   | 1.42  | 0.80     | 2.50   | 1.24  | 0.73  | 2.11 |  |
| ART                    | 487   | 48    | 9.90  | 1.85    | 1.32   | 2.60 | 1.52     | 1.09   | 2.11 | 25        | 5.15   | 1.26  | 0.80     | 1.99   | 1.05  | 0.68  | 1.62 |  |
| <b>Fine motor</b>      |       |       |       |         |        |      |          |        |      |           |        |       |          |        |       |       |      |  |
| Natural conception     | 8,895 | 389   | 4.37  | ref     |        |      | ref      |        |      | 514       | 5.78   | ref   |          |        | ref   |       |      |  |
| OI/AIH                 | 273   | 17    | 6.25  | 1.74    | 1.05   | 2.88 | 1.27     | 0.76   | 2.12 | 19        | 6.99   | 1.22  | 0.73     | 2.04   | 1.19  | 0.73  | 1.94 |  |
| ART                    | 487   | 34    | 7.01  | 1.70    | 1.16   | 2.50 | 1.28     | 0.88   | 1.89 | 30        | 6.19   | 1.09  | 0.73     | 1.64   | 1.06  | 0.71  | 1.57 |  |
| <b>Problem solving</b> |       |       |       |         |        |      |          |        |      |           |        |       |          |        |       |       |      |  |
| Natural conception     | 8,895 | 354   | 3.98  | ref     |        |      | ref      |        |      | 506       | 5.69   | ref   |          |        | ref   |       |      |  |
| OI/AIH                 | 273   | 13    | 4.78  | 1.23    | 0.66   | 2.27 | 0.89     | 0.50   | 1.59 | 18        | 6.62   | 1.31  | 0.79     | 2.17   | 1.19  | 0.72  | 1.97 |  |
| ART                    | 487   | 32    | 6.60  | 1.57    | 1.03   | 2.38 | 1.19     | 0.80   | 1.77 | 26        | 5.36   | 0.92  | 0.60     | 1.43   | 0.92  | 0.60  | 1.39 |  |
| <b>Personal-social</b> |       |       |       |         |        |      |          |        |      |           |        |       |          |        |       |       |      |  |
| Natural conception     | 8,895 | 449   | 5.05  | ref     |        |      | ref      |        |      | 401       | 4.51   | ref   |          |        | ref   |       |      |  |
| OI/AIH                 | 273   | 24    | 8.82  | 1.89    | 1.20   | 2.99 | 1.45     | 0.93   | 2.27 | 16        | 5.88   | 1.48  | 0.87     | 2.52   | 1.19  | 0.70  | 2.02 |  |
| ART                    | 487   | 42    | 8.66  | 1.74    | 1.21   | 2.49 | 1.25     | 0.88   | 1.78 | 27        | 5.57   | 1.19  | 0.77     | 1.86   | 1.07  | 0.70  | 1.62 |  |

Confidence interval: CI, odds ratio: OR, Ovulation induction: OI, Artificial Insemination with husband's semen: AIH, Assisted reproductive technology: ART.

Multivariable logistic models were adjusted for maternal age, parity, gestational week, birth weight, child sex, birth defect, multiple birth, maternal education level, and household income.

STROBE Statement—Checklist of items that should be included in reports of *cohort studies*

|                              | Item No | Recommendation                                                                                                                                                                                                                                                                                                         | Page No |
|------------------------------|---------|------------------------------------------------------------------------------------------------------------------------------------------------------------------------------------------------------------------------------------------------------------------------------------------------------------------------|---------|
| <b>Title and abstract</b>    | 1       | (a) Indicate the study's design with a commonly used term in the title or the abstract<br>(b) Provide in the abstract an informative and balanced summary of what was done and what was found                                                                                                                          | 1, 2    |
| <b>Introduction</b>          |         |                                                                                                                                                                                                                                                                                                                        |         |
| Background/rationale         | 2       | Explain the scientific background and rationale for the investigation being reported                                                                                                                                                                                                                                   | 4       |
| Objectives                   | 3       | State specific objectives, including any prespecified hypotheses                                                                                                                                                                                                                                                       | 4       |
| <b>Methods</b>               |         |                                                                                                                                                                                                                                                                                                                        |         |
| Study design                 | 4       | Present key elements of study design early in the paper                                                                                                                                                                                                                                                                | 5,6     |
| Setting                      | 5       | Describe the setting, locations, and relevant dates, including periods of recruitment, exposure, follow-up, and data collection                                                                                                                                                                                        | 6,      |
| Participants                 | 6       | (a) Give the eligibility criteria, and the sources and methods of selection of participants. Describe methods of follow-up<br>(b) For matched studies, give matching criteria and number of exposed and unexposed                                                                                                      | 6       |
| Variables                    | 7       | Clearly define all outcomes, exposures, predictors, potential confounders, and effect modifiers. Give diagnostic criteria, if applicable                                                                                                                                                                               | 6, 7    |
| Data sources/<br>measurement | 8*      | For each variable of interest, give sources of data and details of methods of assessment (measurement). Describe comparability of assessment methods if there is more than one group                                                                                                                                   | 6, 7    |
| Bias                         | 9       | Describe any efforts to address potential sources of bias                                                                                                                                                                                                                                                              |         |
| Study size                   | 10      | Explain how the study size was arrived at                                                                                                                                                                                                                                                                              | 5,6,9   |
| Quantitative variables       | 11      | Explain how quantitative variables were handled in the analyses. If applicable, describe which groupings were chosen and why                                                                                                                                                                                           | 8       |
| Statistical methods          | 12      | (a) Describe all statistical methods, including those used to control for confounding<br>(b) Describe any methods used to examine subgroups and interactions<br>(c) Explain how missing data were addressed<br>(d) If applicable, explain how loss to follow-up was addressed<br>(e) Describe any sensitivity analyses | 8       |
| <b>Results</b>               |         |                                                                                                                                                                                                                                                                                                                        |         |
| Participants                 | 13*     | (a) Report numbers of individuals at each stage of study—eg numbers potentially eligible, examined for eligibility, confirmed eligible, included in the study, completing follow-up, and analysed<br>(b) Give reasons for non-participation at each stage<br>(c) Consider use of a flow diagram                        | 9       |
| Descriptive data             | 14*     | (a) Give characteristics of study participants (eg demographic, clinical, social) and information on exposures and potential confounders<br>(b) Indicate number of participants with missing data for each variable of interest<br>(c) Summarise follow-up time (eg, average and total amount)                         | 9,10    |
| Outcome data                 | 15*     | Report numbers of outcome events or summary measures over time                                                                                                                                                                                                                                                         | 9,10    |



|    |                          |    |                                                                                                                                                                                                              |       |
|----|--------------------------|----|--------------------------------------------------------------------------------------------------------------------------------------------------------------------------------------------------------------|-------|
| 1  | Main results             | 16 | (a) Give unadjusted estimates and, if applicable, confounder-adjusted estimates and their precision (eg, 95% confidence interval). Make clear which confounders were adjusted for and why they were included | 9,10  |
| 2  |                          |    | (b) Report category boundaries when continuous variables were categorized                                                                                                                                    |       |
| 3  |                          |    | (c) If relevant, consider translating estimates of relative risk into absolute risk for a meaningful time period                                                                                             |       |
| 4  |                          |    |                                                                                                                                                                                                              |       |
| 5  |                          |    |                                                                                                                                                                                                              |       |
| 6  |                          |    |                                                                                                                                                                                                              |       |
| 7  |                          |    |                                                                                                                                                                                                              |       |
| 8  |                          |    |                                                                                                                                                                                                              |       |
| 9  | Other analyses           | 17 | Report other analyses done—eg analyses of subgroups and interactions, and sensitivity analyses                                                                                                               | 10    |
| 10 |                          |    |                                                                                                                                                                                                              |       |
| 11 | <b>Discussion</b>        |    |                                                                                                                                                                                                              |       |
| 12 |                          |    |                                                                                                                                                                                                              |       |
| 13 | Key results              | 18 | Summarise key results with reference to study objectives                                                                                                                                                     | 10,11 |
| 14 | Limitations              | 19 | Discuss limitations of the study, taking into account sources of potential bias or imprecision. Discuss both direction and magnitude of any potential bias                                                   | 14    |
| 15 |                          |    |                                                                                                                                                                                                              |       |
| 16 | Interpretation           | 20 | Give a cautious overall interpretation of results considering objectives, limitations, multiplicity of analyses, results from similar studies, and other relevant evidence                                   | 11-14 |
| 17 |                          |    |                                                                                                                                                                                                              |       |
| 18 |                          |    |                                                                                                                                                                                                              |       |
| 19 | Generalisability         | 21 | Discuss the generalisability (external validity) of the study results                                                                                                                                        | 14    |
| 20 |                          |    |                                                                                                                                                                                                              |       |
| 21 | <b>Other information</b> |    |                                                                                                                                                                                                              |       |
| 22 | Funding                  | 22 | Give the source of funding and the role of the funders for the present study and, if applicable, for the original study on which the present article is based                                                | 16    |
| 23 |                          |    |                                                                                                                                                                                                              |       |
| 24 |                          |    |                                                                                                                                                                                                              |       |

\*Give information separately for exposed and unexposed groups.

**Note:** An Explanation and Elaboration article discusses each checklist item and gives methodological background and published examples of transparent reporting. The STROBE checklist is best used in conjunction with this article (freely available on the Web sites of PLoS Medicine at <http://www.plosmedicine.org/>, Annals of Internal Medicine at <http://www.annals.org/>, and Epidemiology at <http://www.epidem.com/>). Information on the STROBE Initiative is available at <http://www.strobe-statement.org>.
