# Supplementary material for: Association between maternal infertility treatment and child neurodevelopment: findings from the Tohoku Medical Megabank Project Birth and Three-Generation Cohort Study in Miyagi and Iwate Prefectures, Japan
Source: PubMed Central journal article supplement — BMJ Open. 2022 Jun 7;12(6):e060944. doi: 10.1136/bmjopen-2022-060944 (PMC9174802; doi:10.1136/bmjopen-2022-060944), 2022-06-07
Supplement: bmjopen-2022-060944supp001.pdf [file bmjopen-2022-060944supp001.pdf]

**Table S1.** Characteristics of the study population

|                                               | Total   |      | Infertility treatment |      |       |      |       |      |       |      |       |      | p       |
|-----------------------------------------------|---------|------|-----------------------|------|-------|------|-------|------|-------|------|-------|------|---------|
|                                               |         |      | Natural conception    |      | OI    |      | AIH   |      | IVF   |      | ICSI  |      |         |
|                                               | n=9,655 | %    | n=8,895               | %    | n=147 | %    | n=126 | %    | n=342 | %    | n=145 | %    |         |
| <b>Mother's age, mean (SD), y</b>             | 32.7    | 4.7  | 32.4                  | 4.6  | 33.1  | 3.7  | 35.6  | 3.7  | 37.1  | 3.7  | 37.3  | 3.9  | <0.0001 |
| <b>Pre-pregnancy BMI (kg/m<sup>2</sup>)</b>   |         |      |                       |      |       |      |       |      |       |      |       |      |         |
| < 18.5                                        | 1,365   | 14.1 | 1,279                 | 14.4 | 16    | 10.9 | 20    | 15.9 | 29    | 8.5  | 21    | 14.5 | 0.0283  |
| 18.5 to < 25.0                                | 7,204   | 74.6 | 6,636                 | 74.6 | 104   | 70.8 | 92    | 73.0 | 261   | 76.3 | 111   | 76.6 |         |
| ≥ 25.0                                        | 1,083   | 11.2 | 977                   | 11.0 | 27    | 18.4 | 14    | 11.1 | 52    | 15.2 | 13    | 9.0  |         |
| <b>Educational level</b>                      |         |      |                       |      |       |      |       |      |       |      |       |      |         |
| High school graduate or less                  | 2,711   | 28.1 | 2,565                 | 28.8 | 28    | 19.1 | 21    | 16.7 | 74    | 21.6 | 23    | 15.9 | <0.0001 |
| Junior college or vocational college graduate | 3,513   | 36.4 | 3,215                 | 36.1 | 51    | 34.7 | 49    | 38.9 | 135   | 39.5 | 63    | 43.5 |         |
| University graduate or above                  | 2,722   | 28.2 | 2,457                 | 27.6 | 56    | 38.1 | 46    | 36.5 | 111   | 32.5 | 52    | 35.9 |         |
| <b>Household income (JPY/year)</b>            |         |      |                       |      |       |      |       |      |       |      |       |      |         |
| < 4,000,000                                   | 3,117   | 32.3 | 2,974                 | 33.4 | 42    | 28.6 | 21    | 16.7 | 64    | 18.7 | 16    | 11.0 | <0.0001 |
| 4,000,000 to < 6,000,000                      | 3,063   | 31.7 | 2,810                 | 31.6 | 37    | 25.2 | 49    | 38.9 | 120   | 35.1 | 47    | 32.4 |         |
| ≥ 6,000,000                                   | 2,992   | 31.0 | 2,658                 | 29.9 | 62    | 42.2 | 49    | 38.9 | 145   | 42.4 | 78    | 53.8 |         |
| <b>Cigarette smoking</b>                      |         |      |                       |      |       |      |       |      |       |      |       |      |         |
| Never                                         | 6,194   | 64.6 | 5,675                 | 64.3 | 100   | 68.0 | 95    | 75.4 | 221   | 64.8 | 103   | 71.0 | <0.0001 |
| Stopped before pregnancy                      | 2,291   | 23.9 | 2,075                 | 23.5 | 31    | 21.1 | 29    | 23.0 | 115   | 33.7 | 41    | 28.3 |         |
| Stopped after pregnancy                       | 950     | 9.9  | 928                   | 10.5 | 15    | 10.2 | 2     | 1.6  | 5     | 1.5  | 0     | 0.0  |         |
| Smoking at early pregnancy                    | 152     | 1.6  | 150                   | 1.7  | 1     | 0.7  | 0     | 0.0  | 0     | 0.0  | 1     | 0.7  |         |
| <b>Alcohol drinking</b>                       |         |      |                       |      |       |      |       |      |       |      |       |      |         |
| Drinking at early pregnancy                   | 1,917   | 20.0 | 1,766                 | 20.0 | 25    | 17.0 | 32    | 25.6 | 75    | 22.0 | 19    | 13.1 | 0.0741  |
| Former                                        | 3,273   | 34.1 | 3,023                 | 34.2 | 55    | 37.4 | 38    | 30.4 | 112   | 32.8 | 45    | 31.0 |         |
| Never                                         | 3,871   | 40.3 | 3,568                 | 40.4 | 54    | 36.7 | 51    | 40.8 | 128   | 37.5 | 70    | 48.3 |         |
| Cannot drink because of constitution          | 536     | 5.6  | 482                   | 5.5  | 13    | 8.8  | 4     | 3.2  | 26    | 7.6  | 11    | 7.6  |         |
| <b>Parity</b>                                 |         |      |                       |      |       |      |       |      |       |      |       |      |         |
| Nullipara                                     | 4,564   | 47.3 | 4,024                 | 45.2 | 100   | 68.0 | 102   | 81.0 | 242   | 70.8 | 96    | 66.2 | <0.0001 |
| Multipara                                     | 5,091   | 52.7 | 4,871                 | 54.8 | 47    | 32.0 | 24    | 19.1 | 100   | 29.2 | 49    | 33.8 |         |
| <b>Child sex</b>                              |         |      |                       |      |       |      |       |      |       |      |       |      |         |
| Male                                          | 4,958   | 51.4 | 4,581                 | 51.5 | 84    | 57.1 | 53    | 42.1 | 158   | 46.2 | 82    | 56.6 | 0.0205  |
| Female                                        | 4,697   | 48.7 | 4,314                 | 48.5 | 63    | 42.9 | 73    | 57.9 | 184   | 53.8 | 63    | 43.5 |         |
| <b>Gestational week</b>                       |         |      |                       |      |       |      |       |      |       |      |       |      |         |
| ≥37                                           | 9,017   | 93.4 | 8,338                 | 93.7 | 130   | 88.4 | 115   | 91.3 | 302   | 88.3 | 132   | 91.0 | <0.0001 |
| 34 to < 37                                    | 482     | 5.0  | 417                   | 4.7  | 17    | 11.6 | 9     | 7.1  | 28    | 8.2  | 11    | 7.6  |         |
| 29 to < 34                                    | 113     | 1.2  | 98                    | 1.1  | 0     | 0.0  | 2     | 1.6  | 11    | 3.2  | 2     | 1.4  |         |
| < 29                                          | 33      | 0.3  | 32                    | 0.4  | 0     | 0.0  | 0     | 0.0  | 1     | 0.3  | 0     | 0.0  |         |
| <b>Birth weight (g)</b>                       |         |      |                       |      |       |      |       |      |       |      |       |      |         |
| ≥2,500                                        | 8,689   | 90.0 | 8,037                 | 90.4 | 126   | 85.7 | 103   | 81.8 | 294   | 86.0 | 129   | 89.0 | 0.0039  |
| < 2,500                                       | 952     | 9.9  | 844                   | 9.5  | 21    | 14.3 | 23    | 18.3 | 48    | 14.0 | 16    | 11.0 |         |
| <b>Birth defect</b>                           |         |      |                       |      |       |      |       |      |       |      |       |      |         |
| No                                            | 9,477   | 98.3 | 8,740                 | 98.4 | 145   | 98.6 | 124   | 98.4 | 330   | 96.5 | 138   | 95.2 | 0.005   |
| Yes                                           | 169     | 1.8  | 146                   | 1.6  | 2     | 1.4  | 2     | 1.6  | 12    | 3.5  | 7     | 4.8  |         |
| <b>Multiple birth</b>                         |         |      |                       |      |       |      |       |      |       |      |       |      |         |
| No                                            | 9,440   | 97.8 | 8,746                 | 98.3 | 128   | 87.1 | 116   | 92.1 | 311   | 90.9 | 139   | 95.9 | <0.0001 |
| Yes                                           | 215     | 2.2  | 149                   | 1.7  | 19    | 12.9 | 10    | 7.9  | 31    | 9.1  | 6     | 4.1  |         |
| <b>ASQ-3 (2Y)</b>                             |         |      |                       |      |       |      |       |      |       |      |       |      |         |
| > Mean -2SD                                   | 8,218   | 85.1 | 7,626                 | 85.7 | 119   | 81.0 | 96    | 76.2 | 265   | 77.5 | 112   | 77.2 | <0.0001 |
| ≤ Mean-2SD                                    | 1,437   | 14.9 | 1,269                 | 14.3 | 28    | 19.1 | 30    | 23.8 | 77    | 22.5 | 33    | 22.8 |         |
| <b>ASQ-3 (3.5Y)</b>                           |         |      |                       |      |       |      |       |      |       |      |       |      |         |
| > Mean -2SD                                   | 8,398   | 87.0 | 7,746                 | 87.1 | 127   | 86.4 | 106   | 84.1 | 295   | 86.3 | 124   | 85.5 | 0.8329  |
| ≤ Mean-2SD                                    | 1,257   | 13.0 | 1,149                 | 12.9 | 20    | 13.6 | 20    | 15.9 | 47    | 13.7 | 21    | 14.5 |         |
| <b>Father's age, mean (SD), y</b>             | n=4,183 |      | n=3,784               |      | n=74  |      | n=68  |      | n=172 |      | n=85  |      |         |
|                                               | 34.5    | 5.7  | 34.2                  | 5.6  | 34.3  | 4.7  | 35.9  | 4.7  | 38.5  | 5.4  | 39.6  | 4.9  | <0.0001 |

Standard deviation: SD, Body mass index: BMI, Ovulation induction: OI, Artificial Insemination with husband's semen: AIH, In vitro fertilization: IVF, intracytoplasmic sperm injection: ICSI,

Ages &amp; Stages Questionnaires, Third Edition: ASQ-3.

**Table S2.** Odds ratios (95% CIs) from logistic regression models for infertility treatment and children's neurodevelopment at the age of 2 and 3.5 years (n=9,655)

|                        | 2 years |       |       |       |        |      |          |        |      |       | 3.5 years |       |        |      |          |        |      |
|------------------------|---------|-------|-------|-------|--------|------|----------|--------|------|-------|-----------|-------|--------|------|----------|--------|------|
|                        | N       | n     | %     | Crude |        |      | Adjusted |        |      | n     | %         | Crude |        |      | Adjusted |        |      |
|                        |         |       |       | OR    | 95% CI |      | OR       | 95% CI |      |       |           | OR    | 95% CI |      | OR       | 95% CI |      |
|                        |         |       |       | Lower | Upper  |      | Lower    | Upper  |      |       |           | Lower | Upper  |      | Lower    | Upper  |      |
| <b>Total score</b>     |         |       |       |       |        |      |          |        |      |       |           |       |        |      |          |        |      |
| Natural conception     | 8,895   | 1,269 | 14.27 | ref   |        |      | ref      |        |      | 1,149 | 12.92     | ref   |        |      |          | ref    |      |
| OI                     | 147     | 28    | 19.05 | 1.41  | 0.93   | 2.14 | 1.22     | 0.79   | 1.87 | 20    | 13.61     | 1.06  | 0.66   | 1.71 | 1.01     | 0.62   | 1.64 |
| AIH                    | 126     | 30    | 23.81 | 1.88  | 1.24   | 2.84 | 1.53     | 0.99   | 2.34 | 20    | 15.87     | 1.27  | 0.79   | 2.06 | 1.29     | 0.78   | 2.13 |
| IVF                    | 342     | 77    | 22.51 | 1.75  | 1.35   | 2.27 | 1.34     | 1.02   | 1.76 | 47    | 13.74     | 1.07  | 0.79   | 1.47 | 1.02     | 0.73   | 1.42 |
| ICSI                   | 145     | 33    | 22.76 | 1.77  | 1.20   | 2.62 | 1.41     | 0.94   | 2.11 | 21    | 14.48     | 1.14  | 0.72   | 1.82 | 1.07     | 0.66   | 1.74 |
| <b>Communication</b>   |         |       |       |       |        |      |          |        |      |       |           |       |        |      |          |        |      |
| Natural conception     | 8,895   | 445   | 5     | ref   |        |      | ref      |        |      | 482   | 5.42      | ref   |        |      |          | ref    |      |
| OI                     | 147     | 16    | 10.88 | 2.32  | 1.37   | 3.93 | 2.12     | 1.22   | 3.69 | 9     | 6.12      | 1.14  | 0.58   | 2.25 | 1.05     | 0.52   | 2.12 |
| AIH                    | 126     | 11    | 8.73  | 1.82  | 0.97   | 3.40 | 1.71     | 0.88   | 3.30 | 8     | 6.35      | 1.18  | 0.58   | 2.44 | 1.23     | 0.59   | 2.59 |
| IVF                    | 342     | 19    | 5.56  | 1.12  | 0.70   | 1.79 | 0.94     | 0.57   | 1.54 | 20    | 5.85      | 1.08  | 0.68   | 1.72 | 1.02     | 0.63   | 1.64 |
| ICSI                   | 145     | 8     | 5.52  | 1.11  | 0.54   | 2.28 | 0.98     | 0.47   | 2.05 | 9     | 6.21      | 1.16  | 0.59   | 2.28 | 1.10     | 0.55   | 2.20 |
| <b>Gross motor</b>     |         |       |       |       |        |      |          |        |      |       |           |       |        |      |          |        |      |
| Natural conception     | 8,895   | 483   | 5.43  | ref   |        |      | ref      |        |      | 367   | 4.13      | ref   |        |      |          | ref    |      |
| OI                     | 147     | 7     | 4.76  | 0.87  | 0.41   | 1.87 | 0.76     | 0.35   | 1.64 | 8     | 5.44      | 1.34  | 0.65   | 2.75 | 1.19     | 0.57   | 2.48 |
| AIH                    | 126     | 13    | 10.32 | 2.00  | 1.12   | 3.58 | 1.59     | 0.88   | 2.89 | 8     | 6.35      | 1.58  | 0.76   | 3.25 | 1.32     | 0.63   | 2.77 |
| IVF                    | 342     | 32    | 9.36  | 1.80  | 1.24   | 2.62 | 1.38     | 0.93   | 2.05 | 14    | 4.09      | 0.99  | 0.58   | 1.71 | 0.80     | 0.45   | 1.40 |
| ICSI                   | 145     | 17    | 11.72 | 2.31  | 1.38   | 3.87 | 1.81     | 1.07   | 3.07 | 11    | 7.59      | 1.91  | 1.02   | 3.56 | 1.64     | 0.87   | 3.12 |
| <b>Fine motor</b>      |         |       |       |       |        |      |          |        |      |       |           |       |        |      |          |        |      |
| Natural conception     | 8,895   | 389   | 4.37  | ref   |        |      | ref      |        |      | 513   | 5.77      | ref   |        |      |          | ref    |      |
| OI                     | 147     | 7     | 4.76  | 1.09  | 0.51   | 2.35 | 1.02     | 0.47   | 2.22 | 10    | 6.8       | 1.19  | 0.62   | 2.28 | 1.12     | 0.58   | 2.17 |
| AIH                    | 126     | 10    | 7.94  | 1.89  | 0.98   | 3.63 | 1.55     | 0.80   | 3.03 | 9     | 7.14      | 1.26  | 0.63   | 2.49 | 1.29     | 0.64   | 2.62 |
| IVF                    | 342     | 27    | 7.89  | 1.87  | 1.25   | 2.81 | 1.45     | 0.95   | 2.22 | 18    | 5.26      | 0.91  | 0.56   | 1.47 | 0.86     | 0.52   | 1.43 |
| ICSI                   | 145     | 7     | 4.83  | 1.11  | 0.52   | 2.39 | 0.87     | 0.40   | 1.89 | 13    | 8.97      | 1.61  | 0.90   | 2.86 | 1.49     | 0.82   | 2.70 |
| <b>Problem solving</b> |         |       |       |       |        |      |          |        |      |       |           |       |        |      |          |        |      |
| Natural conception     | 8,895   | 354   | 3.98  | ref   |        |      | ref      |        |      | 505   | 5.68      | ref   |        |      |          | ref    |      |
| OI                     | 147     | 6     | 4.08  | 1.03  | 0.45   | 2.34 | 0.80     | 0.34   | 1.84 | 9     | 6.12      | 1.08  | 0.55   | 2.14 | 1.12     | 0.56   | 2.23 |
| AIH                    | 126     | 7     | 5.56  | 1.42  | 0.66   | 3.06 | 1.00     | 0.46   | 2.20 | 9     | 7.14      | 1.28  | 0.65   | 2.53 | 1.31     | 0.65   | 2.64 |
| IVF                    | 342     | 22    | 6.43  | 1.66  | 1.06   | 2.59 | 1.13     | 0.70   | 1.80 | 20    | 5.85      | 1.03  | 0.65   | 1.64 | 0.98     | 0.60   | 1.57 |
| ICSI                   | 145     | 10    | 6.9   | 1.79  | 0.93   | 3.43 | 1.31     | 0.67   | 2.55 | 7     | 4.83      | 0.84  | 0.39   | 1.81 | 0.76     | 0.35   | 1.66 |
| <b>Personal-social</b> |         |       |       |       |        |      |          |        |      |       |           |       |        |      |          |        |      |
| Natural conception     | 8,895   | 449   | 5.05  | ref   |        |      | ref      |        |      | 400   | 4.5       | ref   |        |      |          | ref    |      |
| OI                     | 147     | 10    | 6.8   | 1.37  | 0.72   | 2.63 | 1.17     | 0.60   | 2.27 | 8     | 5.44      | 1.22  | 0.60   | 2.51 | 1.13     | 0.54   | 2.35 |
| AIH                    | 126     | 14    | 11.11 | 2.35  | 1.34   | 4.13 | 1.77     | 0.99   | 3.19 | 8     | 6.35      | 1.44  | 0.70   | 2.97 | 1.28     | 0.60   | 2.70 |
| IVF                    | 342     | 26    | 7.6   | 1.55  | 1.03   | 2.33 | 1.09     | 0.71   | 1.68 | 20    | 5.85      | 1.32  | 0.83   | 2.10 | 1.09     | 0.67   | 1.78 |
| ICSI                   | 145     | 16    | 11.03 | 2.33  | 1.38   | 3.96 | 1.63     | 0.94   | 2.82 | 8     | 5.52      | 1.24  | 0.60   | 2.55 | 0.97     | 0.46   | 2.02 |

Confidence interval: CI, odds ratio: OR, Ovulation induction: OI, Artificial Insemination with husband's semen: AIH, In vitro fertilization: IVF, intracytoplasmic sperm injection: ICSI.

Multivariable logistic models were adjusted for maternal age, parity, gestational week, child sex, birth defect, multiple birth, maternal education level, and household income.

**Table S3.** Characteristics of study population for ET

|                                               | Total   |      | Natural conception |      | ART (n=485) |      |                  |      |         |      | P       |
|-----------------------------------------------|---------|------|--------------------|------|-------------|------|------------------|------|---------|------|---------|
|                                               | n=9,382 | %    | n=8,895            | %    | Fresh ET    |      | Frozen-thawed ET |      | Missing |      |         |
|                                               |         |      |                    |      | n=46        | %    | n=314            | %    | n=127   | %    |         |
| <b>Mother's age, mean (SD), y</b>             | 32.7    | 4.7  | 32.4               | 4.6  | 37.8        | 3.6  | 37.3             | 3.8  | 36.8    | 3.6  | <0.0001 |
| <b>Pre-pregnancy BMI (kg/m<sup>2</sup>)</b>   |         |      |                    |      |             |      |                  |      |         |      |         |
| < 18.5                                        | 1,329   | 14.2 | 1,279              | 14.4 | 9           | 19.6 | 30               | 9.6  | 11      | 8.7  | 0.2997  |
| 18.5 to < 25.0                                | 7,008   | 74.7 | 6,636              | 74.6 | 32          | 69.6 | 242              | 77.1 | 98      | 77.2 |         |
| ≥ 25.0                                        | 1,042   | 11.1 | 977                | 11.0 | 5           | 10.9 | 42               | 13.4 | 18      | 14.2 |         |
| <b>Educational level</b>                      |         |      |                    |      |             |      |                  |      |         |      |         |
| High school graduate or less                  | 2,662   | 28.4 | 2,565              | 28.8 | 9           | 19.6 | 64               | 20.4 | 24      | 18.9 | 0.0018  |
| Junior college or vocational college graduate | 3,413   | 36.4 | 3,215              | 36.1 | 23          | 50.0 | 122              | 38.9 | 53      | 41.7 |         |
| University graduate or above                  | 2,620   | 27.9 | 2,457              | 27.6 | 12          | 26.1 | 111              | 35.4 | 40      | 31.5 |         |
| <b>Household income (JPY/year)</b>            |         |      |                    |      |             |      |                  |      |         |      |         |
| < 4,000,000                                   | 3,054   | 32.6 | 2,974              | 33.4 | 6           | 13.0 | 53               | 16.9 | 21      | 16.5 | <0.0001 |
| 4,000,000 to < 6,000,000                      | 2,977   | 31.7 | 2,810              | 31.6 | 16          | 34.8 | 108              | 34.4 | 43      | 33.9 |         |
| ≥ 6,000,000                                   | 2,881   | 30.7 | 2,658              | 29.9 | 22          | 47.8 | 144              | 45.9 | 57      | 44.9 |         |
| <b>Cigarette smoking</b>                      |         |      |                    |      |             |      |                  |      |         |      |         |
| Never                                         | 5,999   | 64.4 | 5,675              | 64.3 | 24          | 52.2 | 209              | 66.8 | 91      | 71.7 | <0.0001 |
| Stopped before pregnancy                      | 2,231   | 24.0 | 2,075              | 23.5 | 22          | 47.8 | 99               | 31.6 | 35      | 27.6 |         |
| Stopped after pregnancy                       | 933     | 10.0 | 928                | 10.5 | 0           | 0.0  | 4                | 1.3  | 1       | 0.8  |         |
| Smoking at early pregnancy                    | 151     | 1.6  | 150                | 1.7  | 0           | 0.0  | 1                | 0.3  | 0       | 0.0  |         |
| <b>Alcohol drinking</b>                       |         |      |                    |      |             |      |                  |      |         |      |         |
| Drinking at early pregnancy                   | 1,860   | 20.0 | 1,766              | 20.0 | 6           | 13.0 | 60               | 19.2 | 28      | 22.1 | 0.2181  |
| Former                                        | 3,180   | 34.1 | 3,023              | 34.2 | 22          | 47.8 | 98               | 31.3 | 37      | 29.1 |         |
| Never                                         | 3,766   | 40.4 | 3,568              | 40.4 | 16          | 34.8 | 128              | 40.9 | 54      | 42.5 |         |
| Cannot drink because of constitution          | 519     | 5.6  | 482                | 5.5  | 2           | 4.4  | 27               | 8.6  | 8       | 6.3  |         |
| <b>Parity</b>                                 |         |      |                    |      |             |      |                  |      |         |      |         |
| Nullipara                                     | 4,362   | 46.5 | 4,024              | 45.2 | 35          | 76.1 | 212              | 67.5 | 91      | 71.7 | <0.0001 |
| Multipara                                     | 5,020   | 53.5 | 4,871              | 54.8 | 11          | 23.9 | 102              | 32.5 | 36      | 28.4 |         |
| <b>Child sex</b>                              |         |      |                    |      |             |      |                  |      |         |      |         |
| Male                                          | 4,821   | 51.4 | 4,581              | 51.5 | 22          | 47.8 | 156              | 49.7 | 62      | 48.8 | 0.806   |
| Female                                        | 4,561   | 48.6 | 4,314              | 48.5 | 24          | 52.2 | 158              | 50.3 | 65      | 51.2 |         |
| <b>Gestational week</b>                       |         |      |                    |      |             |      |                  |      |         |      |         |
| ≥37                                           | 8,772   | 93.5 | 8,338              | 93.7 | 38          | 82.6 | 285              | 90.8 | 111     | 87.4 | <0.0001 |
| < 37                                          | 610     | 6.5  | 557                | 6.3  | 8           | 17.4 | 29               | 9.2  | 16      | 12.6 |         |
| <b>Birth weight (g)</b>                       |         |      |                    |      |             |      |                  |      |         |      |         |
| ≥2,500                                        | 8,460   | 90.2 | 8,037              | 90.4 | 41          | 89.1 | 277              | 88.2 | 105     | 82.7 | 0.0814  |
| < 2,500                                       | 908     | 9.7  | 844                | 9.5  | 5           | 10.9 | 37               | 11.8 | 22      | 17.3 |         |
| <b>Birth defect</b>                           |         |      |                    |      |             |      |                  |      |         |      |         |
| No                                            | 9,208   | 98.2 | 8,740              | 98.4 | 45          | 97.8 | 302              | 96.2 | 121     | 95.3 | 0.0019  |
| Yes                                           | 165     | 1.8  | 146                | 1.6  | 1           | 2.2  | 12               | 3.8  | 6       | 4.7  |         |
| <b>Multiple birth</b>                         |         |      |                    |      |             |      |                  |      |         |      |         |
| No                                            | 9,196   | 98.0 | 8,746              | 98.3 | 42          | 91.3 | 287              | 91.4 | 121     | 95.3 | <0.0001 |
| Yes                                           | 186     | 2.0  | 149                | 1.7  | 4           | 8.7  | 27               | 8.6  | 6       | 4.7  |         |
| <b>ASQ-3 (2Y)</b>                             |         |      |                    |      |             |      |                  |      |         |      |         |
| > Mean -2SD                                   | 8,003   | 85.3 | 7,626              | 85.7 | 33          | 71.7 | 242              | 77.1 | 102     | 80.3 | <0.0001 |
| ≤ Mean-2SD                                    | 1,379   | 14.7 | 1,269              | 14.3 | 13          | 28.3 | 72               | 22.9 | 25      | 19.7 |         |
| <b>ASQ-3 (3.5Y)</b>                           |         |      |                    |      |             |      |                  |      |         |      |         |
| > Mean -2SD                                   | 8,165   | 87.0 | 7,746              | 87.1 | 39          | 84.8 | 269              | 85.7 | 111     | 87.4 | 0.8594  |
| ≤ Mean-2SD                                    | 1,217   | 13.0 | 1,149              | 12.9 | 7           | 15.2 | 45               | 14.3 | 16      | 12.6 |         |
| <b>Father's age, mean (SD), y</b>             | n=4,041 |      | n=3,784            |      | n=25        |      | n=169            |      | n=63    |      |         |
|                                               | 34.5    | 5.7  | 34.2               | 5.6  | 38.9        | 4.1  | 38.9             | 5.3  | 38.8    | 5.4  | <0.0001 |

Standard deviation: SD, Body mass index: BMI, Embryo transfer: ET, Assisted reproductive technology: ART, Ages &amp; Stages Questionnaires, Third Edition: ASQ-3.

**Table S4.** Odds ratios (95% CIs) from logistic regression models for ET and children's neurodevelopment at the age of 2 and 3.5 years (n=485)

|                        | 2 years |       |       |       |        |       |          |        |       | 3.5 years |       |       |        |       |          |        |       |  |
|------------------------|---------|-------|-------|-------|--------|-------|----------|--------|-------|-----------|-------|-------|--------|-------|----------|--------|-------|--|
|                        | N       | n     | %     | Crude |        |       | Adjusted |        |       | n         | %     | Crude |        |       | Adjusted |        |       |  |
|                        |         |       |       | OR    | 95% CI |       | OR       | 95% CI |       |           |       | OR    | 95% CI |       | OR       | 95% CI |       |  |
|                        |         |       |       |       | Lower  | Upper |          | Lower  | Upper |           |       |       | Lower  | Upper |          | Lower  | Upper |  |
| <b>Total score</b>     |         |       |       |       |        |       |          |        |       |           |       |       |        |       |          |        |       |  |
| Natural conception     | 8,895   | 1,269 | 14.27 | ref   |        |       | ref      |        |       | 1,149     | 12.92 | ref   |        |       | ref      |        |       |  |
| Fresh ET               | 46      | 13    | 28.26 | 2.37  | 1.24   | 4.51  | 1.71     | 0.88   | 3.33  | 7         | 15.22 | 1.21  | 0.54   | 2.71  | 1.12     | 0.49   | 2.58  |  |
| Frozen-thawed ET       | 314     | 72    | 22.93 | 1.79  | 1.37   | 2.34  | 1.39     | 1.05   | 1.85  | 45        | 14.33 | 1.13  | 0.82   | 1.56  | 1.07     | 0.76   | 1.50  |  |
| <b>Communication</b>   |         |       |       |       |        |       |          |        |       |           |       |       |        |       |          |        |       |  |
| Natural conception     | 8,895   | 445   | 5     | ref   |        |       | ref      |        |       | 482       | 5.42  | ref   |        |       | ref      |        |       |  |
| Fresh ET               | 46      | 4     | 8.7   | 1.81  | 0.65   | 5.07  | 1.43     | 0.49   | 4.19  | 1         | 2.17  | 0.39  | 0.05   | 2.82  | 0.33     | 0.04   | 2.42  |  |
| Frozen-thawed ET       | 314     | 16    | 5.1   | 1.02  | 0.61   | 1.70  | 0.88     | 0.52   | 1.50  | 23        | 7.32  | 1.38  | 0.89   | 2.13  | 1.28     | 0.81   | 2.02  |  |
| <b>Gross motor</b>     |         |       |       |       |        |       |          |        |       |           |       |       |        |       |          |        |       |  |
| Natural conception     | 8,895   | 483   | 5.43  | ref   |        |       | ref      |        |       | 367       | 4.13  | ref   |        |       | ref      |        |       |  |
| Fresh ET               | 46      | 5     | 10.87 | 2.12  | 0.84   | 5.40  | 1.51     | 0.59   | 3.90  | 2         | 4.35  | 1.06  | 0.26   | 4.37  | 0.84     | 0.20   | 3.53  |  |
| Frozen-thawed ET       | 314     | 34    | 10.83 | 2.12  | 1.47   | 3.06  | 1.65     | 1.12   | 2.43  | 21        | 6.69  | 1.67  | 1.06   | 2.63  | 1.37     | 0.85   | 2.21  |  |
| <b>Fine motor</b>      |         |       |       |       |        |       |          |        |       |           |       |       |        |       |          |        |       |  |
| Natural conception     | 8,895   | 389   | 4.37  | ref   |        |       | ref      |        |       | 513       | 5.77  | ref   |        |       | ref      |        |       |  |
| Fresh ET               | 46      | 3     | 6.52  | 1.53  | 0.47   | 4.94  | 1.06     | 0.32   | 3.47  | 3         | 6.52  | 1.14  | 0.35   | 3.69  | 1.11     | 0.34   | 3.67  |  |
| Frozen-thawed ET       | 314     | 21    | 6.69  | 1.57  | 1.00   | 2.47  | 1.21     | 0.75   | 1.94  | 19        | 6.05  | 1.05  | 0.66   | 1.69  | 1.01     | 0.62   | 1.65  |  |
| <b>Problem solving</b> |         |       |       |       |        |       |          |        |       |           |       |       |        |       |          |        |       |  |
| Natural conception     | 8,895   | 354   | 3.98  | ref   |        |       | ref      |        |       | 505       | 5.68  | ref   |        |       | ref      |        |       |  |
| Fresh ET               | 46      | 3     | 6.52  | 1.68  | 0.52   | 5.45  | 1.07     | 0.32   | 3.56  | 1         | 2.17  | 0.37  | 0.05   | 2.68  | 0.34     | 0.05   | 2.49  |  |
| Frozen-thawed ET       | 314     | 23    | 7.32  | 1.91  | 1.23   | 2.95  | 1.33     | 0.84   | 2.11  | 18        | 5.73  | 1.01  | 0.62   | 1.64  | 0.95     | 0.57   | 1.56  |  |
| <b>Personal-social</b> |         |       |       |       |        |       |          |        |       |           |       |       |        |       |          |        |       |  |
| Natural conception     | 8,895   | 449   | 5.05  | ref   |        |       | ref      |        |       | 400       | 4.5   | ref   |        |       | ref      |        |       |  |
| Fresh ET               | 46      | 3     | 6.52  | 1.31  | 0.41   | 4.25  | 0.82     | 0.25   | 2.74  | 2         | 4.35  | 0.97  | 0.23   | 4.00  | 0.75     | 0.18   | 3.19  |  |
| Frozen-thawed ET       | 314     | 36    | 11.46 | 2.44  | 1.70   | 3.49  | 1.76     | 1.20   | 2.58  | 17        | 5.41  | 1.22  | 0.74   | 2.00  | 0.99     | 0.59   | 1.66  |  |

Confidence interval: CI, odds ratio: OR, Embryo transfer: ET.

Multivariable logistic models were adjusted for maternal age, parity, gestational week, child sex, birth defect, multiple birth, maternal education level, and household income.

**Table S5.** Odds ratios (95% CIs) from logistic regression models for infertility treatment and children's neurodevelopment at the age of 2 and 3.5 years (n=9,271)

|                       | 2 years |       |       |       |        |       |          |        |       |       | 3.5 years |       |        |       |          |        |       |
|-----------------------|---------|-------|-------|-------|--------|-------|----------|--------|-------|-------|-----------|-------|--------|-------|----------|--------|-------|
|                       | N       | n     | %     | Crude |        |       | Adjusted |        |       | n     | %         | Crude |        |       | Adjusted |        |       |
|                       |         |       |       | OR    | 95% CI |       | OR       | 95% CI |       |       |           | OR    | 95% CI |       | OR       | 95% CI |       |
|                       |         |       |       |       | Lower  | Upper |          | Lower  | Upper |       |           |       | Lower  | Upper |          | Lower  | Upper |
| Total score           |         |       |       |       |        |       |          |        |       |       |           |       |        |       |          |        |       |
| Natural conception    | 8,602   | 1,200 | 13.95 | ref   |        |       | ref      |        |       | 1,092 | 12.69     | ref   |        |       | ref      |        |       |
| OI/AIH                | 239     | 48    | 20.08 | 1.55  | 1.12   | 2.14  | 1.36     | 0.98   | 1.89  | 35    | 14.64     | 1.18  | 0.82   | 1.70  | 1.20     | 0.83   | 1.75  |
| ART                   | 430     | 90    | 20.93 | 1.63  | 1.28   | 2.08  | 1.33     | 1.03   | 1.71  | 57    | 13.26     | 1.05  | 0.79   | 1.40  | 1.05     | 0.78   | 1.41  |
| Communication         |         |       |       |       |        |       |          |        |       |       |           |       |        |       |          |        |       |
| Natural conception    | 8,602   | 411   | 4.78  | ref   |        |       | ref      |        |       | 452   | 5.25      | ref   |        |       | ref      |        |       |
| OI/AIH                | 239     | 19    | 7.95  | 1.72  | 1.07   | 2.78  | 1.77     | 1.08   | 2.90  | 15    | 6.28      | 1.21  | 0.71   | 2.05  | 1.30     | 0.76   | 2.23  |
| ART                   | 430     | 19    | 4.42  | 0.92  | 0.58   | 1.48  | 0.87     | 0.53   | 1.41  | 22    | 5.12      | 0.97  | 0.63   | 1.51  | 1.01     | 0.64   | 1.59  |
| Gross motor           |         |       |       |       |        |       |          |        |       |       |           |       |        |       |          |        |       |
| Spontaneous pregnancy | 8,602   | 452   | 5.25  | ref   |        |       | ref      |        |       | 336   | 3.91      | ref   |        |       | ref      |        |       |
| OI/AIH                | 239     | 17    | 7.11  | 1.38  | 0.84   | 2.28  | 1.14     | 0.69   | 1.90  | 13    | 5.44      | 1.42  | 0.80   | 2.50  | 1.26     | 0.71   | 2.24  |
| ART                   | 430     | 40    | 9.30  | 1.85  | 1.32   | 2.60  | 1.50     | 1.05   | 2.14  | 21    | 4.88      | 1.26  | 0.80   | 1.99  | 1.10     | 0.69   | 1.76  |
| Fine motor            |         |       |       |       |        |       |          |        |       |       |           |       |        |       |          |        |       |
| Natural conception    | 8,602   | 363   | 4.22  | ref   |        |       | ref      |        |       | 479   | 5.57      | ref   |        |       | ref      |        |       |
| OI/AIH                | 239     | 17    | 7.11  | 1.74  | 1.05   | 2.88  | 1.51     | 0.90   | 2.52  | 16    | 6.69      | 1.22  | 0.73   | 2.04  | 1.19     | 0.70   | 2.02  |
| ART                   | 430     | 30    | 6.98  | 1.70  | 1.16   | 2.50  | 1.33     | 0.89   | 2.00  | 26    | 6.05      | 1.09  | 0.73   | 1.64  | 1.09     | 0.71   | 1.67  |
| Problem solving       |         |       |       |       |        |       |          |        |       |       |           |       |        |       |          |        |       |
| Natural conception    | 8,602   | 326   | 3.79  | ref   |        |       | ref      |        |       | 475   | 5.52      | ref   |        |       | ref      |        |       |
| OI/AIH                | 239     | 11    | 4.6   | 1.23  | 0.66   | 2.27  | 0.98     | 0.53   | 1.84  | 17    | 7.11      | 1.31  | 0.79   | 2.17  | 1.34     | 0.80   | 2.24  |
| ART                   | 430     | 25    | 5.81  | 1.57  | 1.03   | 2.38  | 1.20     | 0.77   | 1.85  | 22    | 5.12      | 0.92  | 0.60   | 1.43  | 0.89     | 0.57   | 1.40  |
| Personal-social       |         |       |       |       |        |       |          |        |       |       |           |       |        |       |          |        |       |
| Natural conception    | 8,602   | 417   | 4.85  | ref   |        |       | ref      |        |       | 372   | 4.32      | ref   |        |       | ref      |        |       |
| OI/AIH                | 239     | 21    | 8.79  | 1.89  | 1.20   | 2.99  | 1.55     | 0.97   | 2.49  | 15    | 6.28      | 1.48  | 0.87   | 2.52  | 1.35     | 0.78   | 2.34  |
| ART                   | 430     | 35    | 8.14  | 1.74  | 1.21   | 2.49  | 1.28     | 0.88   | 1.86  | 22    | 5.12      | 1.19  | 0.77   | 1.86  | 1.02     | 0.65   | 1.62  |

Confidence interval: CI, odds ratio: OR, Ovulation induction: OI, Artificial Insemination with husband's semen: AIH, Assisted reproductive technology: ART.

Multivariable logistic models were adjusted for maternal age, parity, gestational week, childsex, maternal education level, and household income.

**Table S6.** Odds ratios (95% CIs) from logistic regression models for infertility treatment and children's neurodevelopment at the age of 2 and 3.5 years (n=9,655)

|                       | N     | n     | %     | 2 years |        |       |          |        |       | 3.5 years |        |       |          |        |       |      |      |
|-----------------------|-------|-------|-------|---------|--------|-------|----------|--------|-------|-----------|--------|-------|----------|--------|-------|------|------|
|                       |       |       |       | Crude   |        |       | Adjusted |        |       | Crude     |        |       | Adjusted |        |       |      |      |
|                       |       |       |       | OR      | 95% CI |       | OR       | 95% CI |       | OR        | 95% CI |       | OR       | 95% CI |       |      |      |
|                       |       |       |       |         | Lower  | Upper |          | Lower  | Upper |           | Lower  | Upper |          | Lower  | Upper |      |      |
| Total score           |       |       |       |         |        |       |          |        |       |           |        |       |          |        |       |      |      |
| Natural conception    | 8,895 | 1,270 | 14.27 | ref     |        |       | ref      |        |       | 1,150     | 12.92  | ref   |          |        | ref   |      |      |
| OI/AIH                | 273   | 58    | 21.32 | 1.55    | 1.12   | 2.14  | 1.38     | 1.01   | 1.87  | 40        | 14.71  | 1.18  | 0.82     | 1.70   | 1.15  | 0.81 | 1.64 |
| ART                   | 487   | 109   | 22.47 | 1.63    | 1.28   | 2.08  | 1.37     | 1.08   | 1.73  | 67        | 13.81  | 1.05  | 0.79     | 1.40   | 1.04  | 0.78 | 1.37 |
| Communication         |       |       |       |         |        |       |          |        |       |           |        |       |          |        |       |      |      |
| Natural conception    | 8,895 | 446   | 5.01  | ref     |        |       | ref      |        |       | 483       | 5.43   | ref   |          |        | ref   |      |      |
| OI/AIH                | 273   | 27    | 9.93  | 1.72    | 1.07   | 2.78  | 1.99     | 1.29   | 3.08  | 17        | 6.25   | 1.21  | 0.71     | 2.05   | 1.16  | 0.69 | 1.94 |
| ART                   | 487   | 26    | 5.36  | 0.92    | 0.58   | 1.48  | 0.96     | 0.63   | 1.47  | 28        | 5.77   | 0.97  | 0.63     | 1.51   | 1.05  | 0.70 | 1.57 |
| Gross motor           |       |       |       |         |        |       |          |        |       |           |        |       |          |        |       |      |      |
| Spontaneous pregnancy | 8,895 | 484   | 5.44  | ref     |        |       | ref      |        |       | 367       | 4.12   | ref   |          |        | ref   |      |      |
| OI/AIH                | 273   | 20    | 7.35  | 1.38    | 0.84   | 2.28  | 1.18     | 0.73   | 1.89  | 16        | 5.88   | 1.42  | 0.80     | 2.50   | 1.32  | 0.78 | 2.24 |
| ART                   | 487   | 48    | 9.90  | 1.85    | 1.32   | 2.60  | 1.53     | 1.10   | 2.13  | 25        | 5.15   | 1.26  | 0.80     | 1.99   | 1.04  | 0.67 | 1.62 |
| Fine motor            |       |       |       |         |        |       |          |        |       |           |        |       |          |        |       |      |      |
| Natural conception    | 8,895 | 389   | 4.37  | ref     |        |       | ref      |        |       | 514       | 5.78   | ref   |          |        | ref   |      |      |
| OI/AIH                | 273   | 17    | 6.25  | 1.74    | 1.05   | 2.88  | 1.34     | 0.80   | 2.23  | 19        | 6.99   | 1.22  | 0.73     | 2.04   | 1.24  | 0.76 | 2.02 |
| ART                   | 487   | 34    | 7.01  | 1.70    | 1.16   | 2.50  | 1.29     | 0.88   | 1.90  | 30        | 6.19   | 1.09  | 0.73     | 1.64   | 1.05  | 0.71 | 1.57 |
| Problem solving       |       |       |       |         |        |       |          |        |       |           |        |       |          |        |       |      |      |
| Natural conception    | 8,895 | 354   | 3.98  | ref     |        |       | ref      |        |       | 506       | 5.69   | ref   |          |        | ref   |      |      |
| OI/AIH                | 273   | 13    | 4.78  | 1.23    | 0.66   | 2.27  | 0.93     | 0.52   | 1.67  | 18        | 6.62   | 1.31  | 0.79     | 2.17   | 1.24  | 0.75 | 2.05 |
| ART                   | 487   | 32    | 6.60  | 1.57    | 1.03   | 2.38  | 1.19     | 0.80   | 1.77  | 26        | 5.36   | 0.92  | 0.60     | 1.43   | 0.91  | 0.60 | 1.37 |
| Personal-social       |       |       |       |         |        |       |          |        |       |           |        |       |          |        |       |      |      |
| Natural conception    | 8,895 | 449   | 5.05  | ref     |        |       | ref      |        |       | 401       | 4.51   | ref   |          |        | ref   |      |      |
| OI/AIH                | 273   | 24    | 8.82  | 1.89    | 1.20   | 2.99  | 1.52     | 0.98   | 2.38  | 16        | 5.88   | 1.48  | 0.87     | 2.52   | 1.23  | 0.72 | 2.09 |
| ART                   | 487   | 42    | 8.66  | 1.74    | 1.21   | 2.49  | 1.27     | 0.89   | 1.80  | 27        | 5.57   | 1.19  | 0.77     | 1.86   | 1.06  | 0.70 | 1.60 |

Confidence interval: CI, odds ratio: OR, Ovulation induction: OI, Artificial Insemination with husband's semen: AIH, Assisted reproductive technology: ART.

Multivariable logistic models were adjusted for maternal age, parity, gestational week (< 29, 29–34, 34–37, ≥ 37 weeks), child sex, birth defect, multiple birth, maternal education level, and household income.

**Table S7.** Odds ratios (95% CIs) from logistic regression models for infertility treatment and children's neurodevelopment at the age of 2 and 3.5 years (n=9,655)

|                        | 2 years |       |       |       |        |       |          |        |       | 3.5 years |       |       |        |       |          |        |       |  |
|------------------------|---------|-------|-------|-------|--------|-------|----------|--------|-------|-----------|-------|-------|--------|-------|----------|--------|-------|--|
|                        | N       | n     | %     | Crude |        |       | Adjusted |        |       | n         | %     | Crude |        |       | Adjusted |        |       |  |
|                        |         |       |       | OR    | 95% CI |       | OR       | 95% CI |       |           |       | OR    | 95% CI |       | OR       | 95% CI |       |  |
|                        |         |       |       |       | Lower  | Upper |          | Lower  | Upper |           |       |       | Lower  | Upper |          | Lower  | Upper |  |
| <b>Total score</b>     |         |       |       |       |        |       |          |        |       |           |       |       |        |       |          |        |       |  |
| Natural conception     | 8,895   | 1,270 | 14.27 | ref   |        |       | ref      |        |       | 1,150     | 12.92 | ref   |        |       | ref      |        |       |  |
| OI/AIH                 | 273     | 58    | 21.32 | 1.55  | 1.12   | 2.14  | 1.35     | 0.99   | 1.84  | 40        | 14.71 | 1.18  | 0.82   | 1.70  | 1.12     | 0.79   | 1.60  |  |
| ART                    | 487     | 109   | 22.47 | 1.63  | 1.28   | 2.08  | 1.37     | 1.08   | 1.73  | 67        | 13.81 | 1.05  | 0.79   | 1.40  | 1.04     | 0.79   | 1.38  |  |
| <b>Communication</b>   |         |       |       |       |        |       |          |        |       |           |       |       |        |       |          |        |       |  |
| Natural conception     | 8,895   | 446   | 5.01  | ref   |        |       | ref      |        |       | 483       | 5.43  | ref   |        |       | ref      |        |       |  |
| OI/AIH                 | 273     | 27    | 9.93  | 1.72  | 1.07   | 2.78  | 1.93     | 1.25   | 2.97  | 17        | 6.25  | 1.21  | 0.71   | 2.05  | 1.12     | 0.67   | 1.88  |  |
| ART                    | 487     | 26    | 5.36  | 0.92  | 0.58   | 1.48  | 0.96     | 0.63   | 1.46  | 28        | 5.77  | 0.97  | 0.63   | 1.51  | 1.06     | 0.70   | 1.59  |  |
| <b>Gross motor</b>     |         |       |       |       |        |       |          |        |       |           |       |       |        |       |          |        |       |  |
| Spontaneous pregnancy  | 8,895   | 484   | 5.44  | ref   |        |       | ref      |        |       | 367       | 4.12  | ref   |        |       | ref      |        |       |  |
| OI/AIH                 | 273     | 20    | 7.35  | 1.38  | 0.84   | 2.28  | 1.14     | 0.71   | 1.84  | 16        | 5.88  | 1.42  | 0.80   | 2.50  | 1.24     | 0.73   | 2.11  |  |
| ART                    | 487     | 48    | 9.90  | 1.85  | 1.32   | 2.60  | 1.52     | 1.09   | 2.11  | 25        | 5.15  | 1.26  | 0.80   | 1.99  | 1.05     | 0.68   | 1.62  |  |
| <b>Fine motor</b>      |         |       |       |       |        |       |          |        |       |           |       |       |        |       |          |        |       |  |
| Natural conception     | 8,895   | 389   | 4.37  | ref   |        |       | ref      |        |       | 514       | 5.78  | ref   |        |       | ref      |        |       |  |
| OI/AIH                 | 273     | 17    | 6.25  | 1.74  | 1.05   | 2.88  | 1.27     | 0.76   | 2.12  | 19        | 6.99  | 1.22  | 0.73   | 2.04  | 1.19     | 0.73   | 1.94  |  |
| ART                    | 487     | 34    | 7.01  | 1.70  | 1.16   | 2.50  | 1.28     | 0.88   | 1.89  | 30        | 6.19  | 1.09  | 0.73   | 1.64  | 1.06     | 0.71   | 1.57  |  |
| <b>Problem solving</b> |         |       |       |       |        |       |          |        |       |           |       |       |        |       |          |        |       |  |
| Natural conception     | 8,895   | 354   | 3.98  | ref   |        |       | ref      |        |       | 506       | 5.69  | ref   |        |       | ref      |        |       |  |
| OI/AIH                 | 273     | 13    | 4.78  | 1.23  | 0.66   | 2.27  | 0.89     | 0.50   | 1.59  | 18        | 6.62  | 1.31  | 0.79   | 2.17  | 1.19     | 0.72   | 1.97  |  |
| ART                    | 487     | 32    | 6.60  | 1.57  | 1.03   | 2.38  | 1.19     | 0.80   | 1.77  | 26        | 5.36  | 0.92  | 0.60   | 1.43  | 0.92     | 0.60   | 1.39  |  |
| <b>Personal-social</b> |         |       |       |       |        |       |          |        |       |           |       |       |        |       |          |        |       |  |
| Natural conception     | 8,895   | 449   | 5.05  | ref   |        |       | ref      |        |       | 401       | 4.51  | ref   |        |       | ref      |        |       |  |
| OI/AIH                 | 273     | 24    | 8.82  | 1.89  | 1.20   | 2.99  | 1.45     | 0.93   | 2.27  | 16        | 5.88  | 1.48  | 0.87   | 2.52  | 1.19     | 0.70   | 2.02  |  |
| ART                    | 487     | 42    | 8.66  | 1.74  | 1.21   | 2.49  | 1.25     | 0.88   | 1.78  | 27        | 5.57  | 1.19  | 0.77   | 1.86  | 1.07     | 0.70   | 1.62  |  |

Confidence interval: CI, odds ratio: OR, Ovulation induction: OI, Artificial Insemination with husband's semen: AIH, Assisted reproductive technology: ART.

Multivariable logistic models were adjusted for maternal age, parity, gestational week, birth weight, child sex, birth defect, multiple birth, maternal education level, and household income.
